# Supplementary material for: An argument for abandoning the “allowed” and “forbidden” classification of electrocyclic reactions
Source: Royal Society of Chemistry journal article supplement (doi:10.1039/d4sc08748h), 2025-01-01
Supplement: d4sc08748h1.pdf [file d4sc08748h1.pdf]

# An Argument for Abandoning the “Allowed” and “Forbidden” Designation of Electrocyclic Reactions.

## Electronic Supplementary Information

Calculations were carried out with Gaussian 09 Revision D.01<sup>1</sup>, GAMESS-US version 30 SEP 2023 (R2)<sup>2</sup> and ORCA version 5.0.4.<sup>3-5</sup> All calculations used the cc-pVTZ basis set, except for those associated with Scheme 10 in the main text, which used aug-cc-pVTZ. All enthalpies and free energies listed here are at 1.0 atm, 298.15 K. The free energies listed as (HO) used the harmonic oscillator approximation, while those listed as (GR) used the Grimme formula for interpolating between harmonic oscillator and free rotor partition functions for low frequency vibrations. See the main text for citations of the basis set and the Grimme free energy interpolation. The descriptions of CASSCF active spaces and details of the NEVPT2 calculations are also provided in the main text.

The data here are organised to match their appearance in the main text. Consequently, references are given to Table, Figure, and Scheme numbers in the main text.

### Data for main text Table 1.

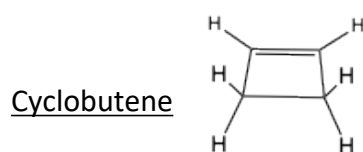

#### CASSCF(4,4) Optimized Geometry

|   |             |             |             |
|---|-------------|-------------|-------------|
| C | -0.66900611 | 0.00000000  | 0.78022879  |
| C | 0.66900611  | 0.00000000  | 0.78022879  |
| C | -0.79909372 | 0.00000000  | -0.72723973 |
| C | 0.79909372  | 0.00000000  | -0.72723973 |
| H | -1.25028634 | -0.88275439 | -1.16333926 |
| H | 1.25028634  | -0.88275439 | -1.16333926 |
| H | -1.25028634 | 0.88275439  | -1.16333926 |
| H | 1.25028634  | 0.88275439  | -1.16333926 |
| H | -1.40451407 | 0.00000000  | 1.56126869  |
| H | 1.40451407  | 0.00000000  | 1.56126869  |

|               |   |                |
|---------------|---|----------------|
| CASSCF Energy | = | -154.998588277 |
| NEVPT2 Energy | = | -155.670028593 |
| NIMAG         | = | 0              |
| CASSCF H      | = | -154.903470644 |
| CASSCF G (HO) | = | -154.933114675 |
| CASSCF G (GR) | = | -154.933116698 |

#### M06-2X Optimized Geometry

|   |             |             |             |
|---|-------------|-------------|-------------|
| C | -0.78074804 | 0.00000000  | -0.72224702 |
| C | -0.66533654 | 0.00000000  | 0.78544381  |
| C | 0.66533654  | 0.00000000  | 0.78544381  |
| C | 0.78074804  | 0.00000000  | -0.72224702 |
| H | 1.23613725  | 0.88720784  | -1.16170844 |
| H | 1.23613725  | -0.88720784 | -1.16170844 |
| H | 1.40944302  | 0.00000000  | 1.57038439  |
| H | -1.40944302 | 0.00000000  | 1.57038439  |
| H | -1.23613725 | -0.88720784 | -1.16170844 |

H -1.23613725 0.88720784 -1.16170844

M06-2X Energy = -155.950732745

NIMAG = 0

M06-2X H = -155.858795234

M06-2X G (HO) = -155.888503779

M06-2X G (GR) = -155.888506018

#### ωB97X-D Optimized Geometry

C 0.78126024 0.00000000 -0.69691767

C 0.66546990 0.00000000 0.81043291

C -0.66546990 0.00000000 0.81043291

C -0.78126024 0.00000000 -0.69691767

H -1.23779328 0.88687033 -1.13777697

H -1.23779328 -0.88687033 -1.13777697

H -1.41020061 0.00000000 1.59446246

H 1.41020061 0.00000000 1.59446246

H 1.23779328 -0.88687033 -1.13777697

H 1.23779328 0.88687033 -1.13777697

ωB97X-D Energy = -155.975191355

NIMAG = 0

ωB97X-D H = -155.882892506

ωB97X-D G (HO) = -155.912532628

ωB97X-D G (GR) = -155.912534644

#### PBE0-D3BJ Optimized Geometry

C 0.77939606 0.00000000 -0.69512644

C 0.66693178 0.00000000 0.80889875

C -0.66693178 0.00000000 0.80889875

C -0.77939606 0.00000000 -0.69512644

H -1.23752506 0.88735980 -1.13857679

H -1.23752506 -0.88735980 -1.13857679

H -1.41305026 0.00000000 1.59451969

H 1.41305026 0.00000000 1.59451969

H 1.23752506 -0.88735980 -1.13857679

H 1.23752506 0.88735980 -1.13857679

PBE0-D3BJ Energy = -155.838136837

NIMAG = 0

PBE0-D3BJ H = -155.746677038

PBE0-D3BJ G (HO) = -155.776382404

PBE0-D3BJ G (GR) = -155.776384608

#### s-Trans-1,3-butadiene

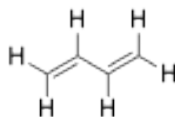

#### CASSCF(4,4) Optimized Geometry

C -1.84643352 0.12347838 0.00000000

C 1.84643352 -0.12347838 0.00000000

C -0.61323613 -0.39838782 0.00000000

C 0.61323613 0.39838782 0.00000000

H -0.49325129 -1.46797657 0.00000000

H 0.49325129 1.46797657 0.00000000

H -2.71859264 -0.50123978 0.00000000

H 2.71859264 0.50123978 0.00000000

H -2.00759745 1.18599832 0.00000000

H 2.00759745 -1.18599832 0.00000000

CASSCF Energy = -155.031768944  
NEVPT2 Energy = -155.694377011  
NIMAG = 0  
CASSCF H = -154.938106049  
CASSCF G (HO) = -154.968843765  
CASSCF G (GR) = -154.968837367

#### M06-2X Optimized Geometry

C 0.60571119 1.73377900 0.00000000  
C -0.60571119 -1.73377900 0.00000000  
C 0.60572420 0.40499320 0.00000000  
C -0.60572420 -0.40499320 0.00000000  
H 1.54696632 -0.13560431 0.00000000  
H -1.54696632 0.13560431 0.00000000  
H 1.52485135 2.30213636 0.00000000  
H -1.52485135 -2.30213636 0.00000000  
H -0.32245185 2.29229582 0.00000000  
H 0.32245185 -2.29229582 0.00000000

M06-2X Energy = -155.967859648  
NIMAG = 0  
M06-2X H = -155.876475052  
M06-2X G (HO) = -155.907832185  
M06-2X G (GR) = -155.907829644

#### ωB97X-D Optimized Geometry

C 0.60367545 1.73634390 0.00000000  
C -0.60367545 -1.73634390 0.00000000  
C 0.60367545 0.40770630 0.00000000  
C -0.60367545 -0.40770630 0.00000000  
H 1.54797931 -0.12784494 0.00000000  
H -1.54797931 0.12784494 0.00000000  
H 1.52492821 2.30195563 0.00000000  
H -1.52492821 -2.30195563 0.00000000  
H -0.32252677 2.29844914 0.00000000  
H 0.32252677 -2.29844914 0.00000000

ωB97X-D Energy = -155.989803645  
NIMAG = 0  
ωB97X-D H = -155.898461409  
ωB97X-D G (HO) = -155.929226108  
ωB97X-D G (GR) = -155.929219990

#### PBE0-D3BJ Optimized Geometry

C 0.60017652 1.73748979 0.00000000  
C -0.60017652 -1.73748979 0.00000000  
C 0.60017652 0.40572623 0.00000000  
C -0.60017652 -0.40572623 0.00000000  
H 1.54608730 -0.13046825 -0.00000000  
H -1.54608730 0.13046825 0.00000000  
H 1.52133437 2.30579951 0.00000000  
H -1.52133437 -2.30579951 0.00000000  
H -0.32777250 2.29928150 -0.00000000  
H 0.32777250 -2.29928150 0.00000000

PBE0-D3BJ Energy = -155.851366462  
NIMAG = 0  
PBE0-D3BJ H = -155.760522478  
PBE0-D3BJ G (HO) = -155.791263538

PBE0-D3BJ G (GR) = -155.791262069

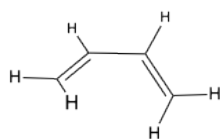

s-Cis-1,3-butadiene

**CASSCF(4,4) Optimized Geometry**

|   |             |             |             |
|---|-------------|-------------|-------------|
| C | -0.72829452 | 0.11771020  | 0.53708780  |
| C | 0.72829452  | -0.11771020 | 0.53708780  |
| C | -1.54665875 | -0.07382533 | -0.50320619 |
| C | 1.54665875  | 0.07382533  | -0.50320619 |
| H | -1.19135314 | -0.45304015 | -1.44293427 |
| H | 1.19135314  | 0.45304015  | -1.44293427 |
| H | -2.59671688 | 0.13420536  | -0.42705521 |
| H | 2.59671688  | -0.13420536 | -0.42705621 |
| H | -1.14674896 | 0.46182266  | 1.46710372  |
| H | 1.14674896  | -0.46182266 | 1.46710372  |

CASSCF Energy = -155.026959579  
NEVPT2 Energy = -155.688672474  
NIMAG = 0  
CASSCF H = -154.933301986  
CASSCF G (HO) = -154.965028492  
CASSCF G (GR) = -154.965005019

**M06-2X Optimized Geometry**

|   |             |             |             |
|---|-------------|-------------|-------------|
| C | 0.10846941  | -1.52008560 | -0.50319507 |
| C | -0.10943485 | -0.72613433 | 0.53803809  |
| C | 0.10943485  | 0.72613433  | 0.53803809  |
| C | -0.10846941 | 1.52008560  | -0.50319507 |
| H | -0.50564941 | 1.12983714  | -1.43199182 |
| H | 0.08855203  | 2.58176126  | -0.45318457 |
| H | 0.45547271  | 1.16060154  | 1.46999823  |
| H | -0.45547271 | -1.16060154 | 1.46999823  |
| H | -0.08855203 | -2.58176126 | -0.45318457 |
| H | 0.50564941  | -1.12983714 | -1.43199182 |

M06-2X Energy = -155.963269792  
NIMAG = 0  
M06-2X H = -155.871935794  
M06-2X G (HO) = -155.904062138  
M06-2X G (GR) = -155.904063700

**ωB97X-D Optimized Geometry**

|   |             |             |             |
|---|-------------|-------------|-------------|
| C | 0.11009224  | -1.52967145 | -0.48622223 |
| C | -0.11009224 | -0.72535687 | 0.54662506  |
| C | 0.11009224  | 0.72535687  | 0.54662506  |
| C | -0.11009224 | 1.52967145  | -0.48622223 |
| H | -0.51162356 | 1.15264323  | -1.41868300 |
| H | 0.08787943  | 2.59079273  | -0.42337526 |
| H | 0.46137480  | 1.15420582  | 1.47964128  |
| H | -0.46137480 | -1.15420582 | 1.47964128  |
| H | -0.08787943 | -2.59079273 | -0.42337526 |
| H | 0.51162356  | -1.15264323 | -1.41868300 |

ωB97X-D Energy = -155.985346553  
NIMAG = 0

$\omega$ B97X-D H = -155.893959695  
 $\omega$ B97X-D G (HO) = -155.925437037  
 $\omega$ B97X-D G (GR) = -155.925437783

#### PBE0-D3BJ Optimized Geometry

C 0.10318456 -1.52757225 -0.48911224  
C -0.10318456 -0.72324630 0.54974165  
C 0.10318456 0.72324630 0.54974165  
C -0.10318456 1.52757225 -0.48911224  
H -0.48417204 1.14806644 -1.43061630  
H 0.08804246 2.59121638 -0.42403955  
H 0.43004908 1.15844176 1.49087936  
H -0.43004908 -1.15844176 1.49087936  
H -0.08804246 -2.59121638 -0.42403955  
H 0.48417204 -1.14806644 -1.43061630

PBE0-D3BJ Energy = -155.846014201  
NIMAG = 0  
PBE0-D3BJ H = -155.755205180  
PBE0-D3BJ G (HO) = -155.786809479  
PBE0-D3BJ G (GR) = -155.786807599

#### First-Order Saddle Point for Conrotatory Ring Opening of Cyclobutene

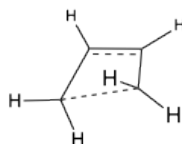

#### CASSCF(4,4) Optimized Geometry

C -1.10956824 -0.10397121 0.66741037  
C 1.10956824 0.10397121 0.66741037  
C -0.67501724 0.07505514 -0.69446248  
C 0.67501724 -0.07505514 -0.69446248  
H -1.31667936 0.31506959 -1.52266693  
H 1.31667936 -0.31506959 -1.52266693  
H -0.96844411 -1.06569004 1.11482871  
H 0.96844411 1.06569004 1.11482871  
H -1.91464007 0.47512308 1.09410882  
H 1.91464007 -0.47512308 1.09410882

CASSCF Energy = -154.942407103  
NEVPT2 Energy = -155.617808792  
NIMAG = 1  
CASSCF H = -154.851067409  
CASSCF G (HO) = -154.880968195  
CASSCF G (GR) = -154.880969789

#### M06-2X Optimized Geometry

C -0.12570777 -1.05178268 -0.64409340  
C 0.08727184 -0.68119160 0.70460266  
C -0.08727184 0.68119160 0.70460266  
C 0.12570777 1.05178268 -0.64409340  
H 0.41146249 -1.86764547 -1.12598242  
H -1.07570132 -0.81895140 -1.09877541  
H 0.41146277 -1.33562247 1.50374926  
H -0.41146277 1.33562247 1.50374926  
H -0.41146249 1.86764547 -1.12598242  
H 1.07570132 0.81895140 -1.09877541

M06-2X Energy = -155.892513287  
NIMAG = 1

M06-2X H = -155.803165393  
M06-2X G (HO) = -155.833446412  
M06-2X G (GR) = -155.833447455

$\omega$ B97X-D Optimized Geometry

|   |             |             |             |
|---|-------------|-------------|-------------|
| C | -1.05592278 | -0.61987155 | -0.12331702 |
| C | -0.68049484 | 0.72718514  | 0.08620619  |
| C | 0.68049483  | 0.72718515  | -0.08620619 |
| C | 1.05592278  | -0.61987156 | 0.12331702  |
| H | -1.87649765 | -1.09376988 | 0.41489627  |
| H | -0.83181123 | -1.07842899 | -1.07380087 |
| H | -1.33416334 | 1.52831734  | 0.40770874  |
| H | 1.33416336  | 1.52831735  | -0.40770872 |
| H | 1.87649767  | -1.09376988 | -0.41489627 |
| H | 0.83181124  | -1.07842901 | 1.07380087  |

$\omega$ B97X-D Energy = -155.914284298  
NIMAG = 1  
 $\omega$ B97X-D H = -155.825002247  
 $\omega$ B97X-D G (HO) = -155.854633028  
 $\omega$ B97X-D G (GR) = -155.854634074

PBE0-D3BJ Optimized Geometry

|   |             |             |             |
|---|-------------|-------------|-------------|
| C | -1.05674240 | -0.62071390 | -0.12237017 |
| C | -0.68044483 | 0.72838636  | 0.08465386  |
| C | 0.68044486  | 0.72838631  | -0.08465385 |
| C | 1.05674243  | -0.62071386 | 0.12237019  |
| H | -1.87396432 | -1.10020538 | 0.41951572  |
| H | -0.82930201 | -1.07909537 | -1.07429899 |
| H | -1.33577419 | 1.53326603  | 0.40053896  |
| H | 1.33577410  | 1.53326597  | -0.40053907 |
| H | 1.87396420  | -1.10020541 | -0.41951571 |
| H | 0.82930191  | -1.07909530 | 1.07429895  |

PBE0-D3BJ Energy = -155.779607386  
NIMAG = 1  
PBE0-D3BJ H = -155.690887526  
PBE0-D3BJ G (HO) = -155.720559040  
PBE0-D3BJ G (GR) = -155.720560136

Second-Order Saddle Point for Disrotatory  
Ring Opening of Cyclobutene

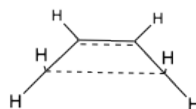

CASSCF(4,4) Optimized Geometry

|   |             |             |             |
|---|-------------|-------------|-------------|
| C | 0.68506002  | -0.03945762 | -1.43060720 |
| C | 0.68506002  | -0.03945762 | 1.43060720  |
| C | -0.58239275 | -0.03713223 | -0.66792512 |
| C | -0.58239275 | -0.03713223 | 0.66792512  |
| H | -1.51249266 | -0.03461505 | -1.21239758 |
| H | -1.51249266 | -0.03461505 | 1.21239758  |
| H | 0.88218814  | 0.73685557  | -2.14519739 |
| H | 0.88218814  | 0.73685557  | 2.14519739  |
| H | 1.25986648  | -0.94124514 | -1.52146375 |
| H | 1.25986648  | -0.94124514 | 1.52146375  |

CASSCF Energy = -154.920735969  
NEVPT2 Energy = -155.571313041  
NIMAG = 2

CASSCF H = -154.833966027  
 CASSCF G (HO) = -154.866069357  
 CASSCF G (GR) = -154.866072169

First-Order Saddle Point for Internal Rotation of Terminal Methylene in s-Cis-1,3-butadiene

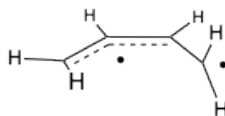

**CASSCF(4,4) Optimized Geometry**

|   |             |             |             |
|---|-------------|-------------|-------------|
| C | -0.00126686 | 0.00399511  | 0.00000000  |
| C | 0.86888671  | -1.18529117 | 0.00000000  |
| C | 2.25872660  | -1.15504634 | 0.00000000  |
| C | 3.05062056  | -0.01699630 | 0.00000000  |
| H | 2.62430048  | 0.96639556  | 0.00000000  |
| H | 4.11943674  | -0.09431411 | 0.00000000  |
| H | 2.76071572  | -2.10675812 | 0.00000000  |
| H | 0.39070296  | -2.14984035 | 0.00000000  |
| H | -0.41018537 | 0.38268486  | -0.91736770 |
| H | -0.41018537 | 0.38268486  | 0.91736770  |

CASSCF Energy = -154.939172612  
 NEVPT2 Energy = -155.597173247  
 NIMAG = 1  
 CASSCF H = -154.851021822  
 CASSCF G (HO) = -154.883431481  
 CASSCF G (GR) = -154.883438068

Bicyclo[4.2.0]octa-1,3,5-triene (Benzocyclobutene)

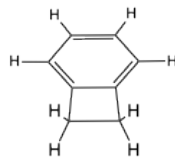

**CASSCF(8,8) Optimized Geometry**

|   |             |             |             |
|---|-------------|-------------|-------------|
| C | -0.80508596 | 0.00000000  | -1.98805881 |
| C | 0.80508596  | 0.00000000  | -1.98805881 |
| C | -0.69200629 | 0.00000000  | -0.47625870 |
| C | 0.69200629  | 0.00000000  | -0.47625870 |
| C | -1.43341994 | 0.00000000  | 0.69244635  |
| C | 1.43341994  | 0.00000000  | 0.69244635  |
| C | -0.69923484 | 0.00000000  | 1.88377833  |
| C | 0.69923484  | 0.00000000  | 1.88377833  |
| H | -1.21715415 | 0.00000000  | 2.82434940  |
| H | 1.21715415  | 0.00000000  | 2.82434940  |
| H | -2.50686049 | 0.00000000  | 0.70774430  |
| H | 2.50686049  | 0.00000000  | 0.70774430  |
| H | -1.25160301 | -0.88253999 | -2.42714977 |
| H | 1.25160301  | -0.88253999 | -2.42714977 |
| H | -1.25160301 | 0.88253999  | -2.42714977 |
| H | 1.25160301  | 0.88253999  | -2.42714977 |

CASSCF Energy = -307.752734636  
 NEVPT2 Energy = -309.056601280  
 NIMAG = 0  
 CASSCF H = -307.605622235  
 CASSCF G (HO) = -307.642050810  
 CASSCF G (GR) = -307.642057269

**M06-2X Optimized Geometry**

|   |             |             |             |
|---|-------------|-------------|-------------|
| C | -0.07092536 | 1.42959176  | -0.69262309 |
| C | -0.03454756 | 0.69622309  | -1.87952257 |
| C | 0.03454756  | -0.69622309 | -1.87952257 |

|   |             |             |             |
|---|-------------|-------------|-------------|
| C | 0.07092536  | -1.42959176 | -0.69262309 |
| C | 0.03416661  | -0.69234826 | 0.47399653  |
| C | -0.03416661 | 0.69234826  | 0.47399653  |
| C | -0.03833956 | 0.78452144  | 1.98733679  |
| C | 0.03833956  | -0.78452144 | 1.98733679  |
| H | -0.12453034 | 2.50998684  | -0.70870964 |
| H | -0.06079478 | 1.21732940  | -2.82725454 |
| H | 0.06079478  | -1.21732940 | -2.82725454 |
| H | 0.12453034  | -2.50998684 | -0.70870964 |
| H | -0.94601165 | 1.19336421  | 2.42849981  |
| H | 0.82573919  | 1.27942416  | 2.42786810  |
| H | 0.94601165  | -1.19336421 | 2.42849981  |
| H | -0.82573919 | -1.27942416 | 2.42786810  |

M06-2X Energy = -309.596466113

NIMAG = 0

M06-2X H = -309.454007017

M06-2X G (HO) = -309.490048758

M06-2X G (GR) = -309.490053705

#### ωB97X-D Optimized Geometry

|   |             |             |             |
|---|-------------|-------------|-------------|
| C | 0.00000000  | 1.43011564  | -0.69166902 |
| C | 0.00000000  | 0.69649340  | -1.87751054 |
| C | 0.00000000  | -0.69649340 | -1.87751054 |
| C | 0.00000000  | -1.43011564 | -0.69166902 |
| C | 0.00000000  | -0.69250408 | 0.47282276  |
| C | 0.00000000  | 0.69250408  | 0.47282276  |
| C | 0.00000000  | 0.78612433  | 1.98535571  |
| C | 0.00000000  | -0.78612433 | 1.98535571  |
| H | 0.00000000  | 2.51200266  | -0.70733973 |
| H | 0.00000000  | 1.21785901  | -2.82566669 |
| H | 0.00000000  | -1.21785901 | -2.82566669 |
| H | 0.00000000  | -2.51200266 | -0.70733973 |
| H | -0.88657258 | 1.23948311  | 2.42733869  |
| H | 0.88657258  | 1.23948311  | 2.42733869  |
| H | 0.88657258  | -1.23948311 | 2.42733869  |
| H | -0.88657258 | -1.23948311 | 2.42733869  |

ωB97X-D Energy = -309.624873661

NIMAG = 0

ωB97X-D H = -309.482221214

ωB97X-D G (HO) = -309.518181889

ωB97X-D G (GR) = -309.518188347

#### PBE0-D3BJ Optimized Geometry

|   |             |             |             |
|---|-------------|-------------|-------------|
| C | 0.00000000  | -1.43165222 | -0.69141434 |
| C | 0.00000000  | -0.69666504 | -1.87709486 |
| C | 0.00000000  | 0.69666504  | -1.87709486 |
| C | 0.00000000  | 1.43165222  | -0.69141434 |
| C | 0.00000000  | 0.69395993  | 0.47397339  |
| C | 0.00000000  | -0.69395993 | 0.47397339  |
| C | 0.00000000  | -0.78440670 | 1.98354299  |
| C | 0.00000000  | 0.78440670  | 1.98354299  |
| H | 0.00000000  | -2.51526971 | -0.70802922 |
| H | 0.00000000  | -1.21871203 | -2.82682501 |
| H | 0.00000000  | 1.21871203  | -2.82682501 |
| H | 0.00000000  | 2.51526971  | -0.70802922 |
| H | 0.88703137  | -1.23940039 | 2.42821337  |
| H | -0.88703137 | -1.23940039 | 2.42821337  |
| H | -0.88703137 | 1.23940039  | 2.42821337  |



H 0.88703137 1.23940039 2.42821337

PBE0-D3BJ Energy = -309.371054882  
NIMAG = 0  
PBE0-D3BJ H = -309.229210234  
PBE0-D3BJ G (HO) = -309.265296383  
PBE0-D3BJ G (GR) = -309.265300911

5,6-Dimethylenecyclohexa-1,3-diene  
(Orthoquinodimethane, Orthoxylylene)

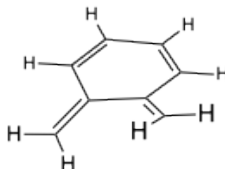

**CASSCF(8,8) Optimized Geometry**

|   |             |             |             |
|---|-------------|-------------|-------------|
| C | 1.41101837  | 0.00881500  | 0.66438454  |
| C | 0.72871190  | 0.00576092  | 1.82344151  |
| C | -0.72871190 | -0.00576092 | 1.82344151  |
| C | -1.41101837 | -0.00881500 | 0.66438454  |
| C | -0.74464327 | 0.00024540  | -0.64101148 |
| C | 0.74464327  | -0.00024540 | -0.64101148 |
| C | 1.49850297  | -0.01116256 | -1.76161242 |
| C | -1.49850297 | 0.01116256  | -1.76161242 |
| H | 2.48447680  | 0.01551438  | 0.66800553  |
| H | 1.25043094  | 0.01092274  | 2.76104045  |
| H | -1.25043094 | -0.01092274 | 2.76104045  |
| H | -2.48447680 | -0.01551438 | 0.66800553  |
| H | 1.08036745  | -0.02218246 | -2.74723339 |
| H | 2.56932783  | -0.00972383 | -1.69495046 |
| H | -2.56932783 | 0.00972383  | -1.69495046 |
| H | -1.08036745 | 0.02218246  | -2.74723339 |

CASSCF Energy = -307.752608966  
NEVPT2 Energy = -309.037818184  
NIMAG = 0  
CASSCF H = -307.608059156  
CASSCF G (HO) = -307.647851272  
CASSCF G (GR) = -307.646380198

**M06-2X Optimized Geometry**

|   |             |             |             |
|---|-------------|-------------|-------------|
| C | 1.40134395  | -0.17889956 | -0.65457021 |
| C | 0.71795505  | -0.11485707 | -1.80363201 |
| C | -0.71795505 | 0.11485707  | -1.80363201 |
| C | -1.40134395 | 0.17889956  | -0.65457021 |
| C | -0.74368167 | -0.00277277 | 0.63727847  |
| C | 0.74368167  | 0.00277277  | 0.63727847  |
| C | 1.47190152  | 0.22483929  | 1.73835762  |
| C | -1.47190152 | -0.22483929 | 1.73835762  |
| H | 2.47540964  | -0.31414786 | -0.65293827 |
| H | 1.23110713  | -0.21346469 | -2.75043587 |
| H | -1.23110713 | 0.21346469  | -2.75043587 |
| H | -2.47540964 | 0.31414786  | -0.65293827 |
| H | 1.01727433  | 0.46368709  | 2.68929511  |
| H | 2.55245519  | 0.19347427  | 1.69791016  |
| H | -2.55245519 | -0.19347427 | 1.69791016  |
| H | -1.01727433 | -0.46368709 | 2.68929511  |

M06-2X Energy = -309.571264875  
NIMAG = 0  
M06-2X H = -309.430218317  
M06-2X G (HO) = -309.468533752  
M06-2X G (GR) = -309.468323496

#### $\omega$ B97X-D Optimized Geometry

|   |             |             |             |
|---|-------------|-------------|-------------|
| C | -0.71635038 | -0.11617912 | 1.80302250  |
| C | 0.71635038  | 0.11617912  | 1.80302250  |
| C | -1.39907205 | -0.18029378 | 0.65404046  |
| C | 1.39907205  | 0.18029378  | 0.65404046  |
| C | -0.74359840 | 0.00413116  | -0.63747132 |
| C | 0.74359840  | -0.00413116 | -0.63747132 |
| C | -1.47298110 | 0.22982639  | -1.73709118 |
| C | 1.47298110  | -0.22982639 | -1.73709118 |
| H | -1.22848403 | -0.21921068 | 2.75001049  |
| H | 1.22848403  | 0.21921068  | 2.75001049  |
| H | -2.47256565 | -0.31969902 | 0.65518832  |
| H | 2.47256565  | 0.31969902  | 0.65518832  |
| H | -2.55366874 | 0.19983539  | -1.69647777 |
| H | 2.55366874  | -0.19983539 | -1.69647777 |
| H | -1.02093625 | 0.46676171  | -2.68973398 |
| H | 1.02093625  | -0.46676171 | -2.68973398 |

$\omega$ B97X-D Energy = -309.595930841  
NIMAG = 0  
 $\omega$ B97X-D H = -309.454818589  
 $\omega$ B97X-D G (HO) = -309.492475700  
 $\omega$ B97X-D G (GR) = -309.492260255

#### PBE0-D3BJ Optimized Geometry

|   |             |             |             |
|---|-------------|-------------|-------------|
| C | 0.71381563  | 0.10921979  | 1.80418587  |
| C | -0.71381563 | -0.10921979 | 1.80418587  |
| C | 1.39791882  | 0.17166351  | 0.65051645  |
| C | -1.39791882 | -0.17166351 | 0.65051645  |
| C | 0.74141848  | -0.00146877 | -0.63305074 |
| C | -0.74141848 | 0.00146877  | -0.63305074 |
| C | 1.47303581  | -0.21808818 | -1.73853815 |
| C | -1.47303581 | 0.21808818  | -1.73853815 |
| H | 1.23131633  | 0.20104086  | 2.75143147  |
| H | -1.23131633 | -0.20104086 | 2.75143147  |
| H | 2.47462487  | 0.29694176  | 0.65003902  |
| H | -2.47462487 | -0.29694176 | 0.65003902  |
| H | 2.55465221  | -0.18206777 | -1.69802070 |
| H | -2.55465221 | 0.18206777  | -1.69802070 |
| H | 1.01968551  | -0.45587587 | -2.69175053 |
| H | -1.01968551 | 0.45587587  | -2.69175053 |

PBE0-D3BJ Energy = -309.341108636  
NIMAG = 0  
PBE0-D3BJ H = -309.200836066  
PBE0-D3BJ G (HO) = -309.238626671  
PBE0-D3BJ G (GR) = -309.238377490

#### First-Order Saddle Point for Conrotatory Ring Opening of Bicyclo[4.2.0]hexa-1,3,5-triene (Benzocyclobutene)

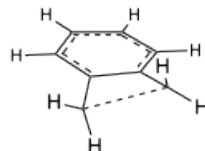

#### CASSCF(8,8) Optimized Geometry

|   |             |             |            |
|---|-------------|-------------|------------|
| C | -0.69533193 | 0.00405641  | 0.53526127 |
| C | 0.69533193  | -0.00405641 | 0.53526127 |
| C | -1.17517841 | -0.20772499 | 1.88936555 |
| C | 1.17517841  | 0.20772499  | 1.88936555 |

|   |             |             |             |
|---|-------------|-------------|-------------|
| C | -1.41031313 | 0.12254327  | -0.66871893 |
| C | 1.41031313  | -0.12254327 | -0.66871893 |
| C | -0.70086849 | 0.07690535  | -1.85397148 |
| C | 0.70086849  | -0.07690535 | -1.85397148 |
| H | -0.93934876 | -1.13999677 | 2.35868144  |
| H | 0.93934876  | 1.13999677  | 2.35868144  |
| H | -2.04632878 | 0.29810685  | 2.27095270  |
| H | 2.04632878  | -0.29810685 | 2.27095270  |
| H | -1.22150779 | 0.12977061  | -2.79118967 |
| H | 1.22150779  | -0.12977061 | -2.79118967 |
| H | -2.48191571 | 0.19160488  | -0.67237234 |
| H | 2.48191571  | -0.19160488 | -0.67237234 |

CASSCF Energy = -307.692846788  
NEVPT2 Energy = -308.992775250  
NIMAG = 1  
CASSCF H = -307.550629239  
CASSCF G (HO) = -307.586892626  
CASSCF G (GR) = -307.586898970

### M06-2X Optimized Geometry

|   |             |             |             |
|---|-------------|-------------|-------------|
| C | 0.21032518  | 1.41450959  | -0.66439241 |
| C | 0.12896261  | 0.69743157  | -1.83126920 |
| C | -0.12896261 | -0.69743157 | -1.83126920 |
| C | -0.21032518 | -1.41450959 | -0.66439241 |
| C | -0.00014769 | -0.70533103 | 0.53529810  |
| C | 0.00014769  | 0.70533103  | 0.53529810  |
| C | -0.29146045 | 1.09651237  | 1.86162922  |
| C | 0.29146045  | -1.09651237 | 1.86162922  |
| H | 0.34285622  | 2.48853108  | -0.67245100 |
| H | 0.22387758  | 1.20693924  | -2.78064675 |
| H | -0.22387758 | -1.20693924 | -2.78064675 |
| H | -0.34285622 | -2.48853108 | -0.67245100 |
| H | -1.17183125 | 0.68408924  | 2.32570749  |
| H | 0.08342550  | 2.01620048  | 2.30387581  |
| H | -0.08342550 | -2.01620048 | 2.30387581  |
| H | 1.17183125  | -0.68408924 | 2.32570749  |

M06-2X Energy = -309.523779488  
NIMAG = 1  
M06-2X H = -309.384570281  
M06-2X G (HO) = -309.421232216  
M06-2X G (GR) = -309.421240455

### ωB97X-D Optimized Geometry

|   |             |             |             |
|---|-------------|-------------|-------------|
| C | 0.20754791  | 1.41246794  | -0.66332867 |
| C | 0.12739525  | 0.69660147  | -1.83000392 |
| C | -0.12739525 | -0.69660147 | -1.83000392 |
| C | -0.20754791 | -1.41246794 | -0.66332867 |
| C | 0.00000000  | -0.70426482 | 0.53488443  |
| C | 0.00000000  | 0.70426482  | 0.53488443  |
| C | -0.28885353 | 1.09957291  | 1.85991654  |
| C | 0.28885353  | -1.09957291 | 1.85991654  |
| H | 0.33991774  | 2.48654637  | -0.67203344 |
| H | 0.22253082  | 1.20597777  | -2.77960866 |
| H | -0.22253082 | -1.20597777 | -2.77960866 |
| H | -0.33991774 | -2.48654637 | -0.67203344 |
| H | -1.17138661 | 0.69460252  | 2.32628684  |
| H | 0.08983034  | 2.01950916  | 2.29855430  |
| H | -0.08983034 | -2.01950916 | 2.29855430  |

H 1.17138661 -0.69460252 2.32628684

ωB97X-D Energy = -309.549316432  
NIMAG = 1  
ωB97X-D H = -309.409962709  
ωB97X-D G (HO) = -309.445912653  
ωB97X-D G (GR) = -309.445920863

#### PBE0-D3BJ Optimized Geometry

C 0.20504777 1.41348609 -0.66129875  
C 0.12558475 0.69485018 -1.83122093  
C -0.12558475 -0.69485018 -1.83122093  
C -0.20504777 -1.41348609 -0.66129875  
C 0.00000000 -0.70587141 0.53316309  
C 0.00000000 0.70587141 0.53316309  
C -0.28913152 1.09980717 1.86038940  
C 0.28913152 -1.09980717 1.86038940  
H 0.32993416 2.49010132 -0.67115331  
H 0.21604297 1.20712999 -2.78170317  
H -0.21604297 -1.20712999 -2.78170317  
H -0.32993416 -2.49010132 -0.67115331  
H -1.17342224 0.69052661 2.32440342  
H 0.09146184 2.01712906 2.30683839  
H -0.09146184 -2.01712906 2.30683839  
H 1.17342224 -0.69052661 2.32440342

PBE0-D3BJ Energy = -309.299881829  
NIMAG = 1  
PBE0-D3BJ H = -309.161446500  
PBE0-D3BJ G (HO) = -309.197533456  
PBE0-D3BJ G (GR) = -309.197541659

#### Second-Order Saddle Point for Disrotatory Ring Opening of Bicyclo[4.2.0]hexa-1,3,5-triene (Benzocyclobutene)

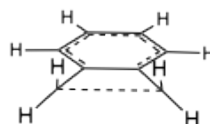

#### CASSCF(8,8) Optimized Geometry

C -1.86526775 0.04559825 -1.34946764  
C -1.86526775 0.04559825 1.34946764  
C -0.53482860 -0.00871353 -0.70003396  
C -0.53482860 -0.00871353 0.70003396  
C 1.87841296 -0.03391083 -0.69407254  
C 1.87841296 -0.03391083 0.69407254  
C 0.66935503 -0.01586942 -1.39362609  
C 0.66935503 -0.01586942 1.39362609  
H 0.67086536 0.00718431 -2.46747422  
H 0.67086536 0.00718431 2.46747422  
H 2.80708528 -0.03544297 -1.23204482  
H 2.80708528 -0.03544297 1.23204482  
H -2.05022502 0.75104165 -2.13706636  
H -2.05022502 0.75104165 2.13706636  
H -2.51571584 -0.80610675 -1.30216420  
H -2.51571584 -0.80610675 1.30216420

CASSCF Energy = -307.680606452  
NEVPT2 Energy = -308.966124980  
NIMAG = 2  
CASSCF H = -307.541558757  
CASSCF G (HO) = -307.578881844

CASSCF G (GR) = -307.578892252

First-Order Saddle Point for Internal Rotation  
of Methylene in 5,6-Dimethylenecyclohexa-1,3-diene  
(Orthoquinodimethane, Orthoxylylene)

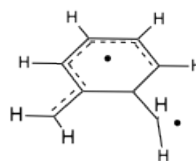

**CASSCF(8,8) Optimized Geometry**

|   |             |             |             |
|---|-------------|-------------|-------------|
| C | -0.55499148 | 0.73802633  | 0.00000000  |
| C | -0.61222583 | -0.69414471 | 0.00000000  |
| C | 0.57160255  | -1.41885599 | 0.00000000  |
| C | 1.82004722  | -0.78930988 | 0.00000000  |
| C | 1.88904922  | 0.60609668  | 0.00000000  |
| C | 0.72823514  | 1.35269075  | 0.00000000  |
| C | -1.90939345 | -1.41190935 | 0.00000000  |
| C | -1.71059695 | 1.53607078  | 0.00000000  |
| H | 0.78191318  | 2.42500846  | 0.00000000  |
| H | 2.84279353  | 1.09833355  | 0.00000000  |
| H | 2.71687857  | -1.37767980 | 0.00000000  |
| H | 0.52293700  | -2.49134327 | 0.00000000  |
| H | -2.44527087 | -1.56374642 | -0.91720751 |
| H | -2.44527087 | -1.56374642 | 0.91720751  |
| H | -2.69324963 | 1.11307930  | 0.00000000  |
| H | -1.63081310 | 2.60481311  | 0.00000000  |

CASSCF Energy = -307.692673020  
NEVPT2 Energy = -308.980583413  
NIMAG = 1  
CASSCF H = -307.552745091  
CASSCF G (HO) = -307.590745619  
CASSCF G (GR) = -307.590743877

**Data for main text Scheme 5.**

Data for reactions **A** and **C** are provided above.

**Reaction B**

1,2-Divinylcyclobutene

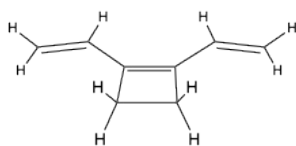

**CASSCF(8,8) Optimized Geometry**

|   |             |             |             |
|---|-------------|-------------|-------------|
| C | -3.00458503 | 0.00000000  | -0.74461900 |
| C | 3.00458503  | 0.00000000  | -0.74461900 |
| C | -1.68365812 | 0.00000000  | -0.97338788 |
| C | 1.68365812  | 0.00000000  | -0.97338788 |
| C | -0.79678398 | 0.00000000  | 1.58191295  |
| C | 0.79678398  | 0.00000000  | 1.58191295  |
| C | -0.67634839 | 0.00000000  | 0.07336356  |
| C | 0.67634839  | 0.00000000  | 0.07336356  |
| H | -3.71056485 | 0.00000000  | -1.55239551 |
| H | 3.71056485  | -0.00000000 | -1.55239551 |
| H | -3.40418196 | 0.00000000  | 0.25231807  |
| H | 3.40418196  | -0.00000000 | 0.25231807  |
| H | -1.32893872 | 0.00000000  | -1.98907821 |
| H | 1.32893872  | 0.00000000  | -1.98907821 |
| H | -1.24795234 | -0.88299727 | 2.01803763  |
| H | 1.24795234  | -0.88299727 | 2.01803763  |

|   |             |            |            |
|---|-------------|------------|------------|
| H | -1.24795234 | 0.88299727 | 2.01803763 |
| H | 1.24795234  | 0.88299727 | 2.01803763 |

|               |   |                |
|---------------|---|----------------|
| CASSCF Energy | = | -308.884323491 |
| NEVPT2 Energy | = | -310.201584710 |
| NIMAG         | = | 0              |
| CASSCF H      | = | -308.715703482 |
| CASSCF G (HO) | = | -308.756695860 |
| CASSCF G (GR) | = | -308.756491579 |

First-Order Saddle Point for Conrotatory Ring Opening of 1,2-Divinylcyclobutene

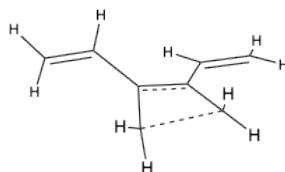

CASSCF(8,8) Optimized Geometry

|   |             |             |             |
|---|-------------|-------------|-------------|
| C | -1.59848607 | 0.19483744  | -0.89014441 |
| C | 1.59848607  | -0.19483744 | -0.89014441 |
| C | -2.91801953 | -0.04082541 | -0.86940992 |
| C | 2.91801953  | 0.04082541  | -0.86940992 |
| C | -0.68851745 | -0.03600493 | 0.23147944  |
| C | 0.68851745  | 0.03600493  | 0.23147944  |
| C | -1.07662761 | -0.29719692 | 1.59152460  |
| C | 1.07662761  | 0.29719692  | 1.59152460  |
| H | -1.16132188 | 0.60308456  | -1.78391194 |
| H | 1.16132188  | -0.60308456 | -1.78391194 |
| H | -3.53546715 | 0.19029383  | -1.71587026 |
| H | 3.53546715  | -0.19029383 | -1.71587026 |
| H | -3.40586209 | -0.46712855 | -0.01322674 |
| H | 3.40586209  | 0.46712855  | -0.01322674 |
| H | -0.75629306 | -1.21036792 | 2.04739332  |
| H | 0.75629306  | 1.21036792  | 2.04739332  |
| H | -1.96476150 | 0.14004421  | 2.02210450  |
| H | 1.96476150  | -0.14004421 | 2.02210450  |

|               |   |                |
|---------------|---|----------------|
| CASSCF Energy | = | -308.823159574 |
| NEVPT2 Energy | = | -310.146138567 |
| NIMAG         | = | 1              |
| CASSCF H      | = | -308.658440262 |
| CASSCF G (HO) | = | -308.699407403 |
| CASSCF G (GR) | = | -308.699166086 |

Second-Order Saddle Point for Disrotatory Ring Opening of 1,2-Divinylcyclobutene

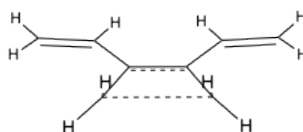

CASSCF(8,8) Optimized Geometry

|   |             |             |             |
|---|-------------|-------------|-------------|
| C | 0.25007772  | -0.00841715 | -0.68239874 |
| C | 0.25007772  | -0.00841715 | 0.68239874  |
| C | 1.58376539  | -0.03509228 | -1.32241488 |
| C | 1.58376539  | -0.03509228 | 1.32241488  |
| C | -0.95167154 | -0.02410028 | -1.52128649 |
| C | -0.95167154 | -0.02410028 | 1.52128649  |
| C | -0.96106052 | 0.04710506  | -2.86145234 |
| C | -0.96106052 | 0.04710506  | 2.86145234  |
| H | -1.89831674 | -0.10073759 | -1.02358639 |
| H | -1.89831674 | -0.10073759 | 1.02358639  |
| H | 2.25695872  | 0.79180956  | -1.21698070 |
| H | 2.25695872  | 0.79180956  | 1.21698070  |
| H | 1.78597081  | -0.72893047 | -2.11496305 |

|   |             |             |             |
|---|-------------|-------------|-------------|
| H | 1.78597081  | -0.72893047 | 2.11496305  |
| H | -0.06336749 | 0.13611864  | -3.44167018 |
| H | -0.06336749 | 0.13611864  | 3.44167018  |
| H | -1.88678753 | 0.02282986  | -3.40326786 |
| H | -1.88678753 | 0.02282986  | 3.40326786  |

|               |   |                |
|---------------|---|----------------|
| CASSCF Energy | = | -308.795513076 |
| NEVPT2 Energy | = | -310.099308563 |
| NIMAG         | = | 2              |
| CASSCF H      | = | -308.635113261 |
| CASSCF G (HO) | = | -308.677332352 |
| CASSCF G (GR) | = | -308.677118876 |

First-Order Saddle Point for Internal Rotation  
of Methylene in 3,4-Dimethylenehexa-1,5-diene

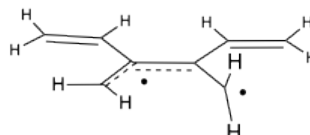

**CASSCF(8,8) Optimized Geometry**

|   |             |             |             |
|---|-------------|-------------|-------------|
| C | -1.46258795 | -0.90903246 | 0.00000000  |
| C | -2.82284951 | -0.99478179 | 0.00000000  |
| C | -0.71057564 | 0.30695269  | 0.00000000  |
| C | -1.46865499 | 1.58074129  | 0.00000000  |
| C | 0.73118645  | 0.35738510  | 0.00000000  |
| C | 1.37461686  | 1.56876242  | 0.00000000  |
| C | 1.52452183  | -0.90076905 | 0.00000000  |
| C | 2.85875964  | -1.01191235 | 0.00000000  |
| H | -3.45553994 | -0.12987463 | 0.00000000  |
| H | -3.30423522 | -1.95305407 | 0.00000000  |
| H | -1.71453428 | 2.07508349  | -0.91950971 |
| H | -1.71453428 | 2.07508349  | 0.91950971  |
| H | 2.44181299  | 1.64034462  | 0.00000000  |
| H | 0.83455420  | 2.49183321  | 0.00000000  |
| H | 3.52604795  | -0.17292345 | 0.00000000  |
| H | 3.31598306  | -1.98266006 | 0.00000000  |
| H | 0.97595668  | -1.81890368 | 0.00000000  |
| H | -0.93086571 | -1.83818400 | 0.00000000  |

|               |   |                |
|---------------|---|----------------|
| CASSCF Energy | = | -308.809678981 |
| NEVPT2 Energy | = | -310.119214601 |
| NIMAG         | = | 1              |
| CASSCF H      | = | -308.649125080 |
| CASSCF G (HO) | = | -308.691384663 |
| CASSCF G (GR) | = | -308.690923099 |

**Reaction D**

1,2-Dihydrocyclobuta[b]naphthalene

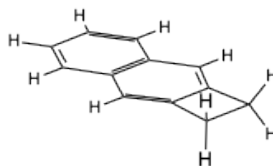

**CASSCF(12,12) Optimized Geometry**

|   |             |             |             |
|---|-------------|-------------|-------------|
| C | -0.80489999 | 0.00000000  | -3.22754326 |
| C | 0.80489999  | -0.00000000 | -3.22754326 |
| C | -0.70449769 | 0.00000000  | -1.71394220 |
| C | 0.70449769  | 0.00000000  | -1.71394220 |
| C | -1.43801999 | 0.00000000  | -0.56934842 |
| C | 1.43801999  | 0.00000000  | -0.56934842 |
| C | -0.71053272 | 0.00000000  | 0.66426036  |
| C | 0.71053272  | 0.00000000  | 0.66426036  |
| C | -1.39221334 | 0.00000000  | 1.91238687  |
| C | 1.39221334  | -0.00000000 | 1.91238687  |

|   |             |             |             |
|---|-------------|-------------|-------------|
| C | -0.70759457 | 0.00000000  | 3.09764394  |
| C | 0.70759457  | 0.00000000  | 3.09764394  |
| H | -1.25114882 | -0.88231409 | -3.66658893 |
| H | 1.25114882  | -0.88231409 | -3.66658893 |
| H | -1.25114882 | 0.88231409  | -3.66658893 |
| H | 1.25114882  | 0.88231409  | -3.66658893 |
| H | -2.51195049 | 0.00000000  | -0.55362281 |
| H | 2.51195049  | 0.00000000  | -0.55362281 |
| H | -2.46628141 | 0.00000000  | 1.91160426  |
| H | 2.46628141  | -0.00000000 | 1.91160426  |
| H | -1.24093640 | 0.00000000  | 4.02893815  |
| H | 1.24093640  | -0.00000000 | 4.02893815  |

CASSCF Energy = -460.499167155  
 NEVPT2 Energy = -462.432357274  
 NIMAG = 0  
 CASSCF H = -460.300845020  
 CASSCF G (HO) = -460.342606345  
 CASSCF G (GR) = -460.342529526

First-Order Saddle Point for Conrotatory  
Ring Opening of Cyclobuta[b]naphthalene

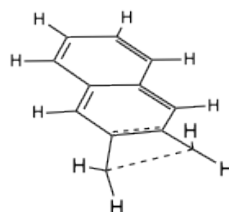

CASSCF(12,12) Optimized Geometry

|   |             |             |             |
|---|-------------|-------------|-------------|
| C | -0.70996088 | 0.05425118  | -3.07458425 |
| C | 0.70996088  | -0.05425118 | -3.07458425 |
| C | -1.39362049 | 0.10646672  | -1.89574897 |
| C | 1.39362049  | -0.10646672 | -1.89574897 |
| C | -0.70903796 | 0.05586032  | -0.64189601 |
| C | 0.70903796  | -0.05586032 | -0.64189601 |
| C | -1.41135824 | 0.07254007  | 0.58335543  |
| C | 1.41135824  | -0.07254007 | 0.58335543  |
| C | -0.70560551 | -0.01840045 | 1.76601207  |
| C | 0.70560551  | 0.01840045  | 1.76601207  |
| C | -1.20537925 | -0.24495600 | 3.11624599  |
| C | 1.20537925  | 0.24495600  | 3.11624599  |
| H | -1.23801422 | 0.09516236  | -4.00791264 |
| H | 1.23801422  | -0.09516236 | -4.00791264 |
| H | -2.46452165 | 0.18680932  | -1.89421546 |
| H | 2.46452165  | -0.18680932 | -1.89421546 |
| H | -2.48556995 | 0.09077634  | 0.57873887  |
| H | 2.48556995  | -0.09077634 | 0.57873887  |
| H | -2.09696031 | 0.23605144  | 3.47871470  |
| H | 2.09696031  | -0.23605144 | 3.47871470  |
| H | -0.93970686 | -1.16469932 | 3.59515071  |
| H | 0.93970686  | 1.16469932  | 3.59515071  |

CASSCF Energy = -460.435816885  
 NEVPT2 Energy = -462.362662338  
 NIMAG = 1  
 CASSCF H = -460.242991662  
 CASSCF G (HO) = -460.286105842  
 CASSCF G (GR) = -460.286019983

First-Order Saddle Point for Disrotatory

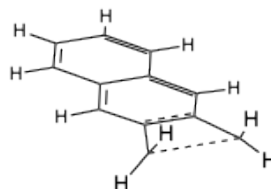



## Ring Opening of Cyclobuta[b]naphthalene

### CASSCF(12,12) Optimized Geometry

|   |             |             |             |
|---|-------------|-------------|-------------|
| C | -3.08526754 | 0.00372421  | -0.70619899 |
| C | -3.08526754 | 0.00372421  | 0.70619899  |
| C | -1.89775360 | -0.00040371 | -1.39388001 |
| C | -1.89775360 | -0.00040371 | 1.39388001  |
| C | -0.65913892 | -0.01063880 | -0.70544654 |
| C | -0.65913892 | -0.01063880 | 0.70544654  |
| C | 0.59056777  | -0.00409021 | -1.40239108 |
| C | 0.59056777  | -0.00409021 | 1.40239108  |
| C | 1.76788485  | -0.02758634 | -0.71355891 |
| C | 1.76788485  | -0.02758634 | 0.71355891  |
| C | 3.11778998  | 0.03419228  | -1.31267393 |
| C | 3.11778998  | 0.03419228  | 1.31267393  |
| H | -4.01681137 | 0.00824076  | -1.23899090 |
| H | -4.01681137 | 0.00824076  | 1.23899090  |
| H | -1.89613175 | 0.00263990  | -2.46786666 |
| H | -1.89613175 | 0.00263990  | 2.46786666  |
| H | 0.58687508  | 0.04008704  | -2.47608447 |
| H | 0.58687508  | 0.04008704  | 2.47608447  |
| H | 3.31291366  | 0.70522177  | -2.12783360 |
| H | 3.31291366  | 0.70522177  | 2.12783360  |
| H | 3.77245593  | -0.81062520 | -1.22405803 |
| H | 3.77245593  | -0.81062520 | 1.22405803  |

CASSCF Energy = -460.428804175

NEVPT2 Energy = -462.345167306

NIMAG = 1

CASSCF H = -460.237046380

CASSCF G (HO) = -460.282254860

CASSCF G (GR) = -460.281521555

### First-Order Saddle Point for Internal Rotation of Methylene in 2,3-Dimethylene-2,3-dihydronaphthalene

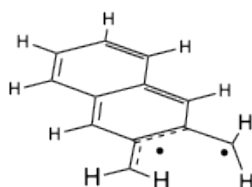

### CASSCF(12,12) Optimized Geometry

|   |             |             |             |
|---|-------------|-------------|-------------|
| C | -3.05614223 | -1.52032530 | 0.00000000  |
| C | -3.01185967 | 1.43084198  | 0.00000000  |
| C | -1.79195971 | -0.74603476 | 0.00000000  |
| C | -1.81443648 | 0.71209388  | 0.00000000  |
| C | -0.59499479 | -1.39577843 | 0.00000000  |
| C | -0.57998936 | 1.38915215  | 0.00000000  |
| C | 0.66121902  | -0.70416352 | 0.00000000  |
| C | 0.65674012  | 0.71020014  | 0.00000000  |
| C | 1.89318697  | -1.39182817 | 0.00000000  |
| C | 1.89954640  | 1.40072723  | 0.00000000  |
| C | 3.08456835  | -0.70258511 | 0.00000000  |
| C | 3.08490848  | 0.71057066  | 0.00000000  |
| H | -3.96586761 | 0.94686244  | 0.00000000  |
| H | -3.59295677 | -1.67541399 | -0.91634560 |
| H | -3.59295677 | -1.67541399 | 0.91634560  |
| H | -3.00090629 | 2.50270817  | 0.00000000  |
| H | -0.58127778 | -2.46979998 | 0.00000000  |
| H | -0.58164286 | 2.46304215  | 0.00000000  |
| H | 1.89226359  | -2.46576849 | 0.00000000  |
| H | 1.89837502  | 2.47455926  | 0.00000000  |

H 4.01577204 -1.23558076 0.00000000  
H 4.01730466 1.24188946 0.00000000

CASSCF Energy = -460.440718898  
NEVPT2 Energy = -462.357566804  
NIMAG = 1  
CASSCF H = -460.249386978  
CASSCF G (HO) = -460.293270553  
CASSCF G (GR) = -460.293126918

## Data for main text Scheme 6.

### Reaction E

#### (Z)-1,3,5-Hexatriene $C_2$ conformation

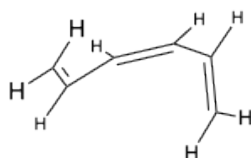

#### CASSCF(6,6) Optimized Geometry

C -0.65093774 -0.16128159 -1.12498856  
C 0.65093774 0.16128159 -1.12498856  
C -1.56153905 -0.34649995 0.02648215  
C 1.56153905 0.34649995 0.02648215  
C -1.73440325 0.51366121 1.03336835  
C 1.73440325 -0.51366121 1.03336835  
H -1.11480439 -0.29922909 -2.08718204  
H 1.11480439 0.29922909 -2.08718204  
H -2.16677117 -1.23718369 -0.00190451  
H 2.16677117 1.23718369 -0.00190451  
H -1.17813265 1.42937386 1.09852970  
H 1.17813265 -1.42937386 1.09852970  
H -2.44037485 0.31314224 1.81689787  
H 2.44037485 -0.31314224 1.81689787

CASSCF Energy = -231.956938147  
NEVPT2 Energy = -232.938678677  
NIMAG = 0  
CASSCF H = -231.826505917  
CASSCF G (HO) = -231.864344160  
CASSCF G (GR) = -231.863985980

#### M06-2X Optimized Geometry

C 0.01578611 0.66706797 1.13201677  
C -0.01578611 -0.66706797 1.13201677  
C -0.01578611 1.58476494 -0.01782076  
C 0.01578611 -1.58476494 -0.01782076  
C -0.85019815 1.49959733 -1.04492778  
C 0.85019815 -1.49959733 -1.04492778  
H 0.06271055 1.15564559 2.10054475  
H -0.06271055 -1.15564559 2.10054475  
H 0.66694768 2.42761536 0.03484459  
H -0.66694768 -2.42761536 0.03484459  
H -1.56948855 0.69426872 -1.11986772  
H 1.56948855 -0.69426872 -1.11986772  
H -0.83631988 2.23216361 -1.84028658  
H 0.83631988 -2.23216361 -1.84028658

M06-2X Energy = -233.348972573  
NIMAG = 0  
M06-2X H = -233.222483389

M06-2X G (HO) = -233.260768261  
M06-2X G (GR) = -233.260181260

$\omega$ B97X-D Optimized Geometry

C 0.01441672 0.66682518 1.12680059  
C -0.01441672 -0.66682518 1.12680059  
C -0.01441672 1.59024299 -0.01653230  
C 0.01441672 -1.59024299 -0.01653230  
C -0.85283216 1.52971163 -1.04168145  
C 0.85283216 -1.52971163 -1.04168145  
H 0.06120143 1.15370662 2.09618922  
H -0.06120143 -1.15370662 2.09618922  
H 0.68138066 2.42225389 0.04009449  
H -0.68138066 -2.42225389 0.04009449  
H -1.58674102 0.73891191 -1.12572088  
H 1.58674102 -0.73891191 -1.12572088  
H -0.82977601 2.27257527 -1.82721458  
H 0.82977601 -2.27257527 -1.82721458

$\omega$ B97X-D Energy = -233.377884516  
NIMAG = 0  
 $\omega$ B97X-D H = -233.250298221  
 $\omega$ B97X-D G (HO) = -233.287384542  
 $\omega$ B97X-D G (GR) = -233.287286185

PBE0-D3BJ Optimized Geometry

C 0.01561474 0.66894093 1.12905379  
C -0.01561474 -0.66894093 1.12905379  
C -0.01561474 1.60506599 0.00553143  
C 0.01561474 -1.60506599 0.00553143  
C -0.79735588 1.52521849 -1.06580684  
C 0.79735588 -1.52521849 -1.06580684  
H 0.06625841 1.14678425 2.10489333  
H -0.06625841 -1.14678425 2.10489333  
H 0.62052433 2.48072549 0.11736847  
H -0.62052433 -2.48072549 0.11736847  
H -1.47620224 0.69393026 -1.21151541  
H 1.47620224 -0.69393026 -1.21151541  
H -0.77733780 2.29248957 -1.82967880  
H 0.77733780 -2.29248957 -1.82967880

PBE0-D3BJ Energy = -233.173987399  
NIMAG = 0  
PBE0-D3BJ H = -233.047483746  
PBE0-D3BJ G (HO) = -233.085496765  
PBE0-D3BJ G (GR) = -233.085081098

(Z)-1,3,5-Hexatriene  $C_{2v}$  conformation

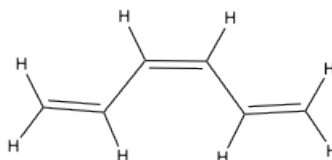

CASSCF(6,6) Optimized Geometry

C -0.67381054 -0.01713595 -0.75486577  
C 0.67381054 0.01713595 -0.75486577  
C -1.55333340 -0.03950074 0.41121214  
C 1.55333340 0.03950074 0.41121214  
C -2.89044571 -0.07319111 0.32275399  
C 2.89044571 0.07319111 0.32275399  
H -1.10351050 -0.02800602 1.38610190  
H 1.10351050 0.02800602 1.38610190

|   |             |             |             |
|---|-------------|-------------|-------------|
| H | -1.16981208 | -0.02985657 | -1.70927066 |
| H | 1.16981208  | 0.02985657  | -1.70927066 |
| H | -3.50838876 | -0.08866983 | 1.19954913  |
| H | 3.50838876  | 0.08866983  | 1.19954913  |
| H | -3.39200234 | -0.08571823 | -0.62753177 |
| H | 3.39200234  | 0.08571823  | -0.62753177 |

CASSCF Energy = -231.969658793  
 NEVPT2 Energy = -232.954612190  
 NIMAG = 0  
 CASSCF H = -231.838478712  
 CASSCF G (HO) = -231.880407752  
 CASSCF G (GR) = -231.879423035

### Cyclohexa-1,3-diene

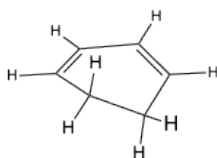

### CASSCF(6,6) Optimized Geometry

|   |             |             |             |
|---|-------------|-------------|-------------|
| C | -0.72626354 | 0.11654629  | 1.23252641  |
| C | 0.72626354  | -0.11654629 | 1.23252641  |
| C | -1.42313268 | 0.09512160  | 0.08841224  |
| C | 1.42313268  | -0.09512160 | 0.08841224  |
| C | -0.74818368 | -0.21952402 | -1.22214403 |
| C | 0.74818368  | 0.21952402  | -1.22214403 |
| H | -1.21849034 | 0.29414685  | 2.17029962  |
| H | 1.21849034  | -0.29414685 | 2.17029962  |
| H | -2.48884112 | 0.23139824  | 0.09756048  |
| H | 2.48884112  | -0.23139824 | 0.09756048  |
| H | -0.80726591 | -1.29158181 | -1.39937465 |
| H | 0.80726591  | 1.29158181  | -1.39937465 |
| H | -1.26453852 | 0.26022570  | -2.04481607 |
| H | 1.26453852  | -0.26022570 | -2.04481607 |

CASSCF Energy = -231.980997054  
 NEVPT2 Energy = -232.974078974  
 NIMAG = 0  
 CASSCF H = -231.847211972  
 CASSCF G (HO) = -231.880807373  
 CASSCF G (GR) = -231.880810926

### M06-2X Optimized Geometry

|   |             |             |             |
|---|-------------|-------------|-------------|
| C | 0.05514133  | 0.73108493  | 1.22201896  |
| C | -0.05514133 | -0.73108493 | 1.22201896  |
| C | -0.05514133 | 1.41501275  | 0.08364256  |
| C | 0.05514133  | -1.41501275 | 0.08364256  |
| C | -0.32168081 | 0.69251234  | -1.20958757 |
| C | 0.32168081  | -0.69251234 | -1.20958757 |
| H | 0.20423417  | 1.24288643  | 2.16377834  |
| H | -0.20423417 | -1.24288643 | 2.16377834  |
| H | -0.01246461 | 2.49676762  | 0.08263787  |
| H | 0.01246461  | -2.49676762 | 0.08263787  |
| H | -1.40777160 | 0.59119496  | -1.33053116 |
| H | 1.40777160  | -0.59119496 | -1.33053116 |
| H | 0.03264305  | 1.27453286  | -2.05982104 |
| H | -0.03264305 | -1.27453286 | -2.05982104 |

M06-2X Energy = -233.389027765  
 NIMAG = 0

M06-2X H = -233.259860597  
M06-2X G (HO) = -233.293515301  
M06-2X G (GR) = -233.293519845

$\omega$ B97X-D Optimized Geometry

|   |             |             |             |
|---|-------------|-------------|-------------|
| C | 0.05191075  | 0.73020261  | 1.22346651  |
| C | -0.05191075 | -0.73020261 | 1.22346651  |
| C | -0.05191075 | 1.41473014  | 0.08566500  |
| C | 0.05191075  | -1.41473014 | 0.08566500  |
| C | -0.30821440 | 0.69930305  | -1.21198951 |
| C | 0.30821440  | -0.69930305 | -1.21198951 |
| H | 0.19331729  | 1.24203948  | 2.16636683  |
| H | -0.19331729 | -1.24203948 | 2.16636683  |
| H | -0.00943400 | 2.49649845  | 0.08642266  |
| H | 0.00943400  | -2.49649845 | 0.08642266  |
| H | -1.39357318 | 0.62184613  | -1.35478694 |
| H | 1.39357318  | -0.62184613 | -1.35478694 |
| H | 0.07173685  | 1.27682808  | -2.05465562 |
| H | -0.07173685 | -1.27682808 | -2.05465562 |

$\omega$ B97X-D Energy = -233.419054623  
NIMAG = 0  
 $\omega$ B97X-D H = -233.289558364  
 $\omega$ B97X-D G (HO) = -233.323173961  
 $\omega$ B97X-D G (GR) = -233.323178446

PBE0-D3BJ Optimized Geometry

|   |             |             |             |
|---|-------------|-------------|-------------|
| C | 0.05264978  | 0.72695300  | 1.22252992  |
| C | -0.05264978 | -0.72695300 | 1.22252992  |
| C | -0.05264978 | 1.41327605  | 0.08237274  |
| C | 0.05264978  | -1.41327605 | 0.08237274  |
| C | -0.31117255 | 0.69553841  | -1.20811358 |
| C | 0.31117255  | -0.69553841 | -1.20811358 |
| H | 0.19344749  | 1.24179626  | 2.16599789  |
| H | -0.19344749 | -1.24179626 | 2.16599789  |
| H | -0.01458711 | 2.49684996  | 0.08364334  |
| H | 0.01458711  | -2.49684996 | 0.08364334  |
| H | -1.39954667 | 0.61267878  | -1.34517542 |
| H | 1.39954667  | -0.61267878 | -1.34517542 |
| H | 0.05829016  | 1.27453492  | -2.05691676 |
| H | -0.05829016 | -1.27453492 | -2.05691676 |

PBE0-D3BJ Energy = -233.219684599  
NIMAG = 0  
PBE0-D3BJ H = -233.090956633  
PBE0-D3BJ G (HO) = -233.124641868  
PBE0-D3BJ G (GR) = -233.124646053

First-Order Saddle Point for Disrotatory  
Ring Closure of (Z)-1,3,5-Hexatriene

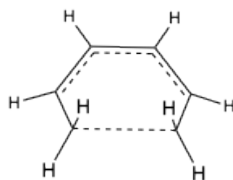

CASSCF(6,6) Optimized Geometry

|   |             |             |             |
|---|-------------|-------------|-------------|
| C | -1.23434329 | -0.05981619 | -1.14155853 |
| C | -1.23434329 | -0.05981619 | 1.14155853  |
| C | 0.10983559  | 0.17382605  | -1.49438524 |
| C | 0.10983559  | 0.17382605  | 1.49438524  |
| C | 1.21142817  | -0.12708642 | -0.70397913 |
| C | 1.21142817  | -0.12708642 | 0.70397913  |

H -1.98859441 0.51130998 -1.65770292  
H -1.98859441 0.51130998 1.65770292  
H -1.53004706 -1.06358290 -0.94497365  
H -1.53004706 -1.06358290 0.94497365  
H 0.30547366 0.76167899 -2.37542200  
H 0.30547366 0.76167899 2.37542200  
H 2.17959785 -0.05391282 -1.16629851  
H 2.17959785 -0.05391282 1.16629851

CASSCF Energy = -231.897238130  
NEVPT2 Energy = -232.904996138  
NIMAG = 1  
CASSCF H = -231.767265497  
CASSCF G (HO) = -231.802476540  
CASSCF G (GR) = -231.802342086

### M06-2X Optimized Geometry

C -0.10769861 -1.21715927 1.12047669  
C -0.10769861 -1.21715927 -1.12047669  
C 0.20145768 0.09142370 1.46261038  
C 0.20145768 0.09142370 -1.46261038  
C -0.10769861 1.21252935 0.69835245  
C -0.10769861 1.21252935 -0.69835245  
H 0.44150671 -2.01847875 1.60334645  
H 0.44150671 -2.01847875 -1.60334645  
H -1.13207352 -1.45990157 0.91488806  
H -1.13207352 -1.45990157 -0.91488806  
H 0.86972706 0.26054899 2.30229047  
H 0.86972706 0.26054899 -2.30229047  
H -0.01318453 2.18439263 1.16882430  
H -0.01318453 2.18439263 -1.16882430

M06-2X Energy = -233.313351194  
NIMAG = 1  
M06-2X H = -233.187035993  
M06-2X G (HO) = -233.222504985  
M06-2X G (GR) = -233.222158219

### ωB97X-D Optimized Geometry

C -0.10605026 -1.21744658 1.12498128  
C -0.10605026 -1.21744658 -1.12498128  
C 0.19837451 0.09264097 1.46460116  
C 0.19837451 0.09264097 -1.46460116  
C -0.10605026 1.21152755 0.69796744  
C -0.10605026 1.21152755 -0.69796744  
H 0.44205479 -2.01604364 1.61405485  
H 0.44205479 -2.01604364 -1.61405485  
H -1.12950425 -1.46378410 0.91884664  
H -1.12950425 -1.46378410 -0.91884664  
H 0.86100390 0.26414813 2.30826397  
H 0.86100390 0.26414813 -2.30826397  
H -0.01012125 2.18309629 1.16890685  
H -0.01012125 2.18309629 -1.16890685

ωB97X-D Energy = -233.341109049  
NIMAG = 1  
ωB97X-D H = -233.214737797  
ωB97X-D G (HO) = -233.249904718  
ωB97X-D G (GR) = -233.249758573

### PBE0-D3BJ Optimized Geometry

|   |             |             |             |
|---|-------------|-------------|-------------|
| C | -0.10602123 | -1.21780405 | 1.13247577  |
| C | -0.10602123 | -1.21780405 | -1.13247577 |
| C | 0.19789337  | 0.09261466  | 1.46502803  |
| C | 0.19789337  | 0.09261466  | -1.46502803 |
| C | -0.10602123 | 1.21207565  | 0.69748697  |
| C | -0.10602123 | 1.21207565  | -0.69748697 |
| H | 0.44321488  | -2.01609516 | 1.62414809  |
| H | 0.44321488  | -2.01609516 | -1.62414809 |
| H | -1.12651477 | -1.46967935 | 0.91098408  |
| H | -1.12651477 | -1.46967935 | -0.91098408 |
| H | 0.86428908  | 0.26583847  | 2.30819340  |
| H | 0.86428908  | 0.26583847  | -2.30819340 |
| H | -0.01251832 | 2.18539619  | 1.16933684  |
| H | -0.01251832 | 2.18539619  | -1.16933684 |

PBE0-D3BJ Energy = -233.145232320

NIMAG = 1

PBE0-D3BJ H = -233.019575259

PBE0-D3BJ G (HO) = -233.054967315

PBE0-D3BJ G (GR) = -233.054729831

### First-Order Saddle Point for Conrotatory Ring Closure of (Z)-1,3,5-Hexatriene

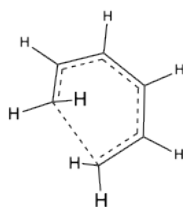

### CASSCF(6,6) Optimized Geometry

|   |             |             |             |
|---|-------------|-------------|-------------|
| C | 1.17022347  | -0.48113438 | 1.15333509  |
| C | -1.17022347 | 0.48113438  | 1.15333509  |
| C | 1.50509536  | 0.19479851  | -0.07168052 |
| C | -1.50509536 | -0.19479851 | -0.07168052 |
| C | 0.68311310  | 0.25868133  | -1.16403544 |
| C | -0.68311310 | -0.25868133 | -1.16403544 |
| H | 1.77125764  | -0.30921894 | 2.02572203  |
| H | -1.77125764 | 0.30921894  | 2.02572203  |
| H | 0.61278403  | -1.39320314 | 1.12975764  |
| H | -0.61278403 | 1.39320314  | 1.12975764  |
| H | 2.44317603  | 0.71930230  | -0.11136726 |
| H | -2.44317603 | -0.71930230 | -0.11136726 |
| H | 1.05054605  | 0.71537554  | -2.06452298 |
| H | -1.05054605 | -0.71537554 | -2.06452298 |

CASSCF Energy = -231.880040966

NEVPT2 Energy = -232.867486508

NIMAG = 1

CASSCF H = -231.754488175

CASSCF G (HO) = -231.789497071

CASSCF G (GR) = -231.789505441

### UM06-2X Optimized Geometry

|   |             |             |             |
|---|-------------|-------------|-------------|
| C | -0.40478413 | 1.11617879  | -1.14553362 |
| C | 0.40478413  | -1.11617879 | -1.14553362 |
| C | 0.28313083  | 1.45565503  | 0.05554383  |
| C | -0.28313083 | -1.45565503 | 0.05554383  |
| C | 0.28313083  | 0.66388705  | 1.17311323  |
| C | -0.28313083 | -0.66388705 | 1.17311323  |
| H | -0.18777147 | 1.65260233  | -2.05809635 |
| H | 0.18777147  | -1.65260233 | -2.05809635 |
| H | -1.35851275 | 0.61259213  | -1.09365036 |

|   |             |             |             |
|---|-------------|-------------|-------------|
| H | 1.35851275  | -0.61259213 | -1.09365036 |
| H | 0.85835949  | 2.37462886  | 0.07226364  |
| H | -0.85835949 | -2.37462886 | 0.07226364  |
| H | 0.71574475  | 1.04511300  | 2.08974651  |
| H | -0.71574475 | -1.04511300 | 2.08974651  |

|                   |   |                |
|-------------------|---|----------------|
| UM06-2X Energy    | = | -233.276741680 |
| NIMAG             | = | 1              |
| <S <sup>2</sup> > | = | 1.0032         |
| UM06-2X H         | = | -233.155073450 |
| UM06-2X G (HO)    | = | -233.189812685 |
| UM06-2X G (GR)    | = | -233.189821239 |

Second-Order Saddle Point for Terminal Methylene  
Internal Rotation of (Z)-1,3,5-Hexatriene

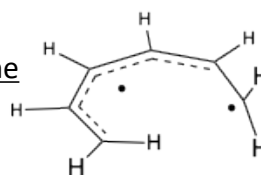

**CASSCF(6,6) Optimized Geometry**

|   |             |             |             |
|---|-------------|-------------|-------------|
| C | -0.81854093 | -1.07538939 | 0.00000000  |
| C | -1.70600295 | -0.03811785 | 0.00000000  |
| C | -1.47962058 | 1.41585088  | 0.00000000  |
| C | 0.60889095  | -1.19561136 | 0.00000000  |
| C | 1.70710957  | -0.28320712 | 0.00000000  |
| C | 1.75800455  | 1.07610500  | 0.00000000  |
| H | -1.29494488 | -2.04057741 | 0.00000000  |
| H | -2.74366164 | -0.33349109 | 0.00000000  |
| H | -1.55407739 | 1.97022831  | -0.91658366 |
| H | -1.55407739 | 1.97022831  | 0.91658366  |
| H | 2.71224999  | 1.56649232  | 0.00000000  |
| H | 0.89135396  | 1.69871843  | 0.00000000  |
| H | 2.66046333  | -0.78344733 | 0.00000000  |
| H | 0.92567533  | -2.22233772 | 0.00000000  |

|               |   |                |
|---------------|---|----------------|
| CASSCF Energy | = | -231.869747918 |
| NEVPT2 Energy | = | -232.851639719 |
| NIMAG         | = | 2              |
| CASSCF H      | = | -231.745039536 |
| CASSCF G (HO) | = | -231.781141785 |
| CASSCF G (GR) | = | -231.781150098 |

**Reaction F**

3,4-Divinyl-1,3,5-Hexatriene

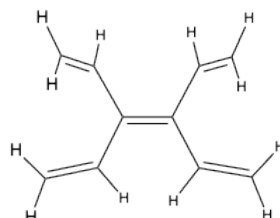

**CASSCF(10,10) Optimized Geometry**

|   |             |             |             |
|---|-------------|-------------|-------------|
| C | -0.68179333 | 0.00000000  | 0.00000000  |
| C | 0.68179333  | 0.00000000  | 0.00000000  |
| C | -1.43470728 | -1.27629542 | 0.05706059  |
| C | 1.43470728  | -1.27629542 | -0.05706059 |
| C | -1.43470728 | 1.27629542  | -0.05706059 |
| C | 1.43470728  | 1.27629542  | 0.05706059  |
| C | -2.61462522 | -1.52476776 | -0.52460575 |
| C | 2.61462522  | -1.52476776 | 0.52460575  |



|   |             |             |             |
|---|-------------|-------------|-------------|
| C | -2.61462522 | 1.52476776  | 0.52460575  |
| C | 2.61462522  | 1.52476776  | -0.52460575 |
| H | -0.97092140 | -2.07464623 | 0.60482168  |
| H | 0.97092140  | -2.07464623 | -0.60482168 |
| H | -0.97092140 | 2.07464623  | -0.60482168 |
| H | 0.97092140  | 2.07464623  | 0.60482168  |
| H | -3.07135081 | -2.49207902 | -0.43594608 |
| H | 3.07135081  | -2.49207902 | 0.43594608  |
| H | -3.07135081 | 2.49207902  | 0.43594608  |
| H | 3.07135081  | 2.49207902  | -0.43594608 |
| H | -3.14179707 | -0.78820682 | -1.09876275 |
| H | 3.14179707  | -0.78820682 | 1.09876275  |
| H | -3.14179707 | 0.78820682  | 1.09876275  |
| H | 3.14179707  | 0.78820682  | -1.09876275 |

CASSCF Energy = -385.825523973  
 NEVPT2 Energy = -387.460962231  
 NIMAG = 0  
 CASSCF H = -385.621443112  
 CASSCF G (HO) = -385.670117750  
 CASSCF G (GR) = -385.668547192

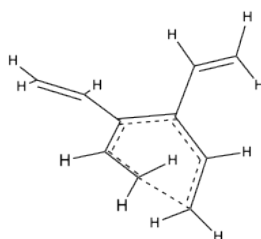

First-order Saddle Point for Conrotatory  
Ring closure of 3,4-Divinyl-1,3,5-Hexatriene

**CASSCF(10,10) Optimized Geometry**

|   |             |             |             |
|---|-------------|-------------|-------------|
| C | 0.87087313  | 0.88238729  | 2.17927209  |
| C | -0.87089283 | -0.88231555 | 2.17928856  |
| C | 0.32132902  | 1.45424601  | 0.98893595  |
| C | -0.32147702 | -1.45426337 | 0.98894366  |
| C | -0.03605377 | 0.74078160  | -0.13470761 |
| C | 0.03628594  | -0.74076271 | -0.13470877 |
| C | -0.29668879 | 2.66612382  | -1.72536546 |
| C | 0.29682209  | -2.66621808 | -1.72529597 |
| C | -0.54399144 | 1.40313685  | -1.34527005 |
| C | 0.54390691  | -1.40309019 | -1.34533659 |
| H | 0.93767808  | 1.49272964  | 3.05973639  |
| H | -0.93806975 | -1.49295912 | 3.05968814  |
| H | -1.53523811 | -0.04644256 | 2.13103618  |
| H | 1.53550138  | 0.04691758  | 2.13095801  |
| H | 0.07499703  | 2.49944198  | 1.01897681  |
| H | -0.07601861 | -2.49990740 | 1.01887905  |
| H | 0.35007153  | 3.31814227  | -1.16988561 |
| H | -0.34937179 | -3.31862083 | -1.16954135 |
| H | -0.73845895 | 3.06605361  | -2.61769525 |
| H | 0.73819215  | -3.06593851 | -2.61781929 |
| H | -1.16725877 | 0.79832063  | -1.97995782 |
| H | 1.16662777  | -0.79804293 | -1.98036230 |

CASSCF Energy = -385.751795014  
 NEVPT2 Energy = -387.391450201  
 NIMAG = 1  
 CASSCF H = -385.552750508  
 CASSCF G (HO) = -385.599404217  
 CASSCF G (GR) = -385.598623347

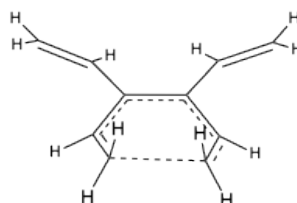

First-order Saddle Point for Disrotatory

## Ring closure of 3,4-Divinyl-1,3,5-Hexatriene

### CASSCF(10,10) Optimized Geometry

|   |             |             |             |
|---|-------------|-------------|-------------|
| C | -1.55216088 | 0.82191276  | 0.28125357  |
| C | -0.69121403 | -0.26652344 | 0.07570736  |
| C | 0.72500517  | -0.11874634 | 0.04081710  |
| C | 1.60201756  | -1.31378169 | 0.09775090  |
| C | 2.85663339  | -1.33866470 | -0.36890498 |
| C | 1.35355005  | 1.12060260  | 0.24663966  |
| C | 0.87144135  | 2.38380747  | -0.13372828 |
| C | -1.30061223 | -1.61404230 | 0.20905968  |
| C | -2.51877746 | -1.92537974 | -0.24930793 |
| C | -1.33699496 | 2.14027111  | -0.14848444 |
| H | 3.45834753  | -2.22333321 | -0.28150918 |
| H | 3.30001864  | -0.49344955 | -0.85993350 |
| H | 1.22083128  | -2.21287722 | 0.53818357  |
| H | 2.21916930  | 1.09174829  | 0.88473032  |
| H | 0.69013235  | 2.56136046  | -1.16838145 |
| H | 1.28514205  | 3.23952285  | 0.37509597  |
| H | -2.92979195 | -2.90585837 | -0.09991445 |
| H | -3.11860711 | -1.22198084 | -0.79486457 |
| H | -0.75077199 | -2.38059649 | 0.71779765  |
| H | -1.18970925 | 2.30540942  | -1.19081155 |
| H | -1.91343549 | 2.91626826  | 0.32774053  |
| H | -2.37715266 | 0.64001810  | 0.94696825  |

CASSCF Energy = -385.760743574

NEVPT2 Energy = -387.420634500

NIMAG = 1

CASSCF H = -385.557779451

CASSCF G (HO) = -385.604727015

CASSCF G (GR) = -385.603415833

### First-order Saddle Point for CH<sub>2</sub> Internal Rotation of 3,4-Divinyl-1,3,5-Hexatriene

### CASSCF(10,10) Optimized Geometry

|   |             |             |             |
|---|-------------|-------------|-------------|
| C | 0.72843087  | -0.08161557 | 0.13107991  |
| C | -0.72798505 | 0.01041458  | 0.11438077  |
| C | -1.51321709 | -1.22952390 | 0.26552838  |
| C | -2.57430906 | -1.59100322 | -0.46780632 |
| C | -1.35610841 | 1.28332273  | -0.02059355 |
| C | -2.68140696 | 1.58074604  | 0.11640101  |
| C | 1.36391025  | -1.27815672 | -0.00705681 |
| C | 2.81860021  | -1.51374531 | 0.08057676  |
| C | 1.50534398  | 1.17337392  | 0.34207417  |
| C | 2.43663535  | 1.65284979  | -0.48517468 |
| H | -3.07799652 | -2.52043560 | -0.28100224 |
| H | -2.94993422 | -0.98489760 | -1.26949201 |
| H | -1.17082902 | -1.90960857 | 1.02553987  |
| H | -3.01668268 | 2.59182145  | -0.00764536 |
| H | -3.41867299 | 0.84816082  | 0.37179779  |
| H | -0.70427887 | 2.10719351  | -0.24032599 |
| H | 3.40884483  | -1.61198781 | -0.81019571 |
| H | 3.24383417  | -1.89159876 | 0.99129691  |
| H | 0.76144071  | -2.15277361 | -0.17888004 |
| H | 2.96207871  | 2.56181159  | -0.26043706 |
| H | 2.69249640  | 1.15524493  | -1.40158830 |

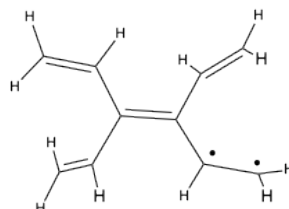

H 1.27096043 1.72774246 1.23448345

CASSCF Energy = -385.743138224

NEVPT2 Energy = -387.373891548

NIMAG = 1

CASSCF H = -385.544565230

CASSCF G (HO) = -385.593234950

CASSCF G (GR) = -385.592216079

## Reaction G

### 7-Vinylbicyclo[4.2.0]octa-1,3,5-triene 4

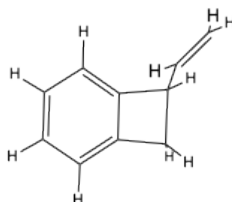

#### CASSCF(10,10) Optimized Geometry

|   |             |             |             |
|---|-------------|-------------|-------------|
| C | -1.34559652 | 0.23513826  | -0.45188309 |
| C | -2.39776002 | -0.21172764 | 0.51286211  |
| C | -3.60782808 | -0.65625200 | 0.16726887  |
| C | 0.06467436  | -0.29987442 | -0.25092125 |
| C | 0.62724041  | 0.94386889  | -0.03332555 |
| C | -0.68397137 | 1.68792514  | -0.17543890 |
| C | 1.97995930  | 1.11273708  | 0.20875647  |
| C | 2.74914655  | -0.05568923 | 0.22579038  |
| C | 2.17817510  | -1.31453704 | 0.01023602  |
| C | 0.80952090  | -1.46688889 | -0.23576434 |
| H | -2.13497411 | -0.16065179 | 1.55672947  |
| H | -3.91054971 | -0.72639869 | -0.86186755 |
| H | -4.32421073 | -0.96230398 | 0.90594623  |
| H | -0.75750565 | 2.37491293  | -1.00845567 |
| H | -1.04897912 | 2.17238336  | 0.72099626  |
| H | 0.38288758  | -2.43815012 | -0.39958362 |
| H | 2.81121829  | -2.18143639 | 0.03506846  |
| H | 3.80497731  | 0.00910429  | 0.41011883  |
| H | 2.43196044  | 2.07165152  | 0.37784456  |
| H | -1.70274682 | 0.14212984  | -1.46985445 |

CASSCF Energy = -384.686073879

NEVPT2 Energy = -386.310486332

NIMAG = 0

CASSCF H = -384.508294141

CASSCF G (HO) = -384.550818740

CASSCF G (GR) = -384.550356214

### First-Order Saddle Point for Outward Conrotatory Ring Opening of 7-Vinylbicyclo[4.2.0]octa-1,3,5-triene

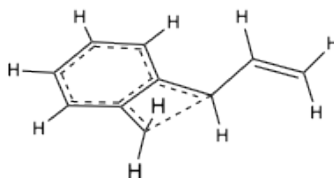

#### CASSCF(10,10) Optimized Geometry

|   |             |             |             |
|---|-------------|-------------|-------------|
| C | -2.12890188 | 0.95495781  | 0.05912088  |
| C | -2.76184549 | -0.27812537 | 0.02294287  |
| C | -2.01701336 | -1.46655075 | -0.03292347 |
| C | -0.63247076 | -1.43293066 | -0.10359821 |
| C | 0.00130102  | -0.18488641 | -0.11488873 |
| C | -0.72944955 | 0.98385218  | 0.04464854  |
| C | 0.18415115  | 2.10951647  | 0.25003893  |

|   |             |             |             |
|---|-------------|-------------|-------------|
| C | 1.41175095  | 0.13606550  | -0.37220716 |
| C | 2.51216922  | -0.50669957 | 0.29506764  |
| C | 3.80650401  | -0.38680244 | -0.07430562 |
| H | 0.73565124  | 2.14055317  | 1.16812918  |
| H | 0.02461791  | 3.05979588  | -0.23044635 |
| H | 4.09435660  | 0.20069699  | -0.92650699 |
| H | 4.59129272  | -0.86556481 | 0.47815143  |
| H | 2.27734678  | -1.09682369 | 1.16450125  |
| H | 1.62052232  | 0.63399668  | -1.29854361 |
| H | -0.06773506 | -2.34173770 | -0.19413288 |
| H | -2.53009901 | -2.40928092 | -0.04794895 |
| H | -3.83342550 | -0.33004239 | 0.05866349  |
| H | -2.69983587 | 1.86097432  | 0.13895322  |

CASSCF Energy = -384.637524626  
 NEVPT2 Energy = -386.258943540  
 NIMAG = 1  
 CASSCF H = -384.462444515  
 CASSCF G (HO) = -384.505095829  
 CASSCF G (GR) = -384.504575463

First-Order Saddle Point for Inward  
 Conrotatory Ring Opening of  
 7-Vinylbicyclo[4.2.0]octa-1,3,5-triene

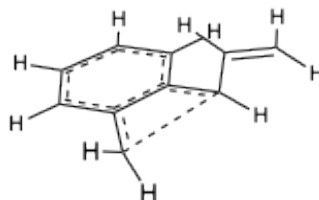

CASSCF(10,10) Optimized Geometry

|   |             |             |             |
|---|-------------|-------------|-------------|
| C | 2.35054839  | -0.28505212 | -0.56112036 |
| C | 1.41069707  | -0.43990787 | 0.50633658  |
| C | -0.05277190 | -0.35275504 | 0.28922700  |
| C | -0.92627173 | -1.42436292 | 0.08858605  |
| C | -2.24886240 | -1.15884626 | -0.24155156 |
| C | -2.69698201 | 0.16075837  | -0.36873857 |
| C | -1.83717951 | 1.22363457  | -0.12818928 |
| C | -0.51553517 | 0.95375359  | 0.24117612  |
| C | 0.50609596  | 1.91573685  | 0.68097181  |
| C | 3.65685965  | -0.63858342 | -0.48528147 |
| H | 0.78818457  | 1.91597550  | 1.71504831  |
| H | 0.69041182  | 2.82513247  | 0.13789347  |
| H | -2.18967319 | 2.23579838  | -0.19645282 |
| H | -3.71847111 | 0.34971802  | -0.63899445 |
| H | -2.92859586 | -1.96971203 | -0.42171818 |
| H | -0.57375924 | -2.43698729 | 0.15037383  |
| H | 1.76376839  | -0.96014675 | 1.38213578  |
| H | 4.07227089  | -1.06720139 | 0.40786615  |
| H | 4.32115349  | -0.49265424 | -1.31424319 |
| H | 1.98260307  | 0.14331742  | -1.47690934 |

CASSCF Energy = -384.632399241  
 NEVPT2 Energy = -386.249992144  
 NIMAG = 1  
 CASSCF H = -384.454244204  
 CASSCF G (HO) = -384.497389900  
 CASSCF G (GR) = -384.497004289

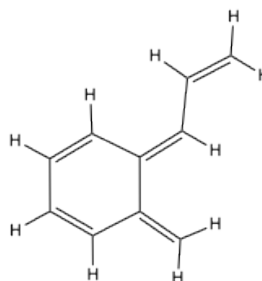

## (E)-5-Allylidene-6-methylenecyclohexa-1,3-diene 5

### CASSCF(10,10) Optimized Geometry

|   |             |             |             |
|---|-------------|-------------|-------------|
| C | 0.26890971  | -1.37656653 | 0.17874086  |
| C | 1.55895258  | -1.75053860 | 0.07544590  |
| C | 2.60524771  | -0.76448940 | -0.14842267 |
| C | 2.30314178  | 0.54543736  | -0.18448718 |
| C | 0.93623072  | 1.03659060  | 0.01065379  |
| C | -0.15036242 | 0.02056258  | 0.05827565  |
| C | -1.46090345 | 0.37532235  | -0.04805964 |
| C | -2.62111368 | -0.50094465 | 0.00671916  |
| C | -3.88066620 | -0.05319420 | -0.12279206 |
| C | 0.74158651  | 2.36432273  | 0.17541601  |
| H | -4.71779537 | -0.72228204 | -0.07641161 |
| H | -4.09660595 | 0.98816899  | -0.27715133 |
| H | -2.47109618 | -1.55213696 | 0.15854861  |
| H | -1.69440159 | 1.41115298  | -0.20301155 |
| H | -0.21529731 | 2.79497709  | 0.38753432  |
| H | 1.56961798  | 3.04369554  | 0.11274732  |
| H | 3.07560714  | 1.27792303  | -0.32230077 |
| H | 3.61894807  | -1.09456240 | -0.26974045 |
| H | 1.82633949  | -2.78721671 | 0.14745822  |
| H | -0.47954873 | -2.12738932 | 0.32458812  |

CASSCF Energy = -384.689989046

NEVPT2 Energy = -386.300080839

NIMAG = 0

CASSCF H = -384.511538147

CASSCF G (HO) = -384.555723416

CASSCF G (GR) = -384.555089256

### First-Order Saddle Point for Interconversion of (E) and (Z)-5-Allylidene-6- methylenecyclohexa-1,3-diene 27

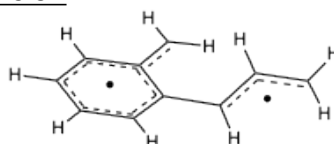

### CASSCF(10,10) Optimized Geometry

|   |             |             |             |
|---|-------------|-------------|-------------|
| C | -0.65407753 | -1.43373072 | -0.19571273 |
| C | -2.02908158 | -1.47730422 | 0.04790131  |
| C | -2.73364186 | -0.28486189 | 0.23691800  |
| C | -2.06986594 | 0.92315453  | 0.18088700  |
| C | -0.66981077 | 0.99669468  | -0.06596559 |
| C | 0.04076589  | -0.23255521 | -0.25214493 |
| C | 1.50150335  | -0.24737057 | -0.52879047 |
| C | 2.47331572  | -0.27316490 | 0.46132773  |
| C | 3.83816695  | -0.29995590 | 0.22251894  |
| C | -0.03782547 | 2.25016332  | -0.12236705 |
| H | 4.54208851  | -0.32282150 | 1.02986884  |
| H | 4.22854662  | -0.30336466 | -0.77728397 |
| H | 2.14216471  | -0.27331871 | 1.48560357  |
| H | 1.81300604  | -0.24027653 | -1.55906725 |
| H | 1.01152384  | 2.34868193  | -0.30290624 |
| H | -0.60612762 | 3.14784908  | 0.01840924  |
| H | -2.61262298 | 1.83816767  | 0.32507539  |

H -3.79008126 -0.30762109 0.42492598  
H -2.53692985 -2.42113566 0.08996850  
H -0.11603190 -2.35146856 -0.34103134

CASSCF Energy = -384.646474194  
NEVPT2 Energy = -386.261156439  
NIMAG = 1  
CASSCF H = -384.469287858  
CASSCF G (HO) = -384.511793252  
CASSCF G (GR) = -384.511543789

### UM06-2X Optimized Geometry

C -0.65406675 -1.43841338 -0.19694106  
C -2.02217264 -1.47486438 0.05339295  
C -2.72093198 -0.28451654 0.23997527  
C -2.05689807 0.91933628 0.17921460  
C -0.66444265 0.98620586 -0.07136744  
C 0.03821286 -0.24007410 -0.26294426  
C 1.49100966 -0.24295527 -0.53759220  
C 2.45292631 -0.26958713 0.45690543  
C 3.80806930 -0.28007996 0.22798338  
C -0.01415064 2.22998416 -0.12329624  
H 4.51655257 -0.30182683 1.04159647  
H 4.19992694 -0.26989169 -0.78021492  
H 2.10232983 -0.28208407 1.48443770  
H 1.81330719 -0.21812437 -1.57446089  
H 1.04703486 2.30583606 -0.30062947  
H -0.57408026 3.14188511 0.02168728  
H -2.59623836 1.84663556 0.32636539  
H -3.78473586 -0.30490249 0.43424188  
H -2.53706933 -2.42420735 0.10310050  
H -0.10959846 -2.36259445 -0.34331943

UM06-2X Energy = -386.929542552  
NIMAG = 1  
<S<sup>2</sup>> = 1.0635  
UM06-2X H = -386.757711405  
UM06-2X G (HO) = -386.800605011  
UM06-2X G (GR) = -386.800295440

### (Z)-5-Allylidene-6-methylenecyclohexa-1,3-diene 6a

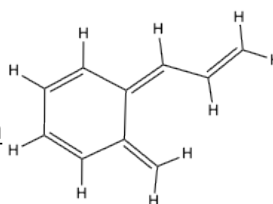

### CASSCF(10,10) Optimized Geometry

C 0.92315330 -1.48749606 0.28508302  
C 2.23166660 -1.28895128 0.03792646  
C 2.71903565 0.03212824 -0.33657965  
C 1.88982240 1.09106152 -0.32101319  
C 0.48869842 0.96709733 0.10082425  
C -0.06262637 -0.41007731 0.16275406  
C -1.37425269 -0.75754431 0.05965865  
C -2.52047985 0.07275031 -0.28354497  
C -3.78784416 -0.36390012 -0.21131255  
C -0.17587288 2.07044250 0.50552179  
H -4.60920635 0.25918501 -0.50774254  
H -4.02741734 -1.34761271 0.14930562  
H -2.33587959 1.06132077 -0.65522181  
H -1.59962595 -1.80196682 0.18862413

|   |             |             |             |
|---|-------------|-------------|-------------|
| H | -1.15385187 | 2.03222670  | 0.93671377  |
| H | 0.29170524  | 3.03507671  | 0.44804736  |
| H | 2.25436615  | 2.07408247  | -0.55162176 |
| H | 3.75120873  | 0.15233855  | -0.60402879 |
| H | 2.92453700  | -2.10646562 | 0.09000274  |
| H | 0.55942666  | -2.47125506 | 0.51404334  |

CASSCF Energy = -384.687532848  
 NEVPT2 Energy = -386.297961622  
 NIMAG = 0  
 CASSCF H = -384.510342476  
 CASSCF G (HO) = -384.553668602  
 CASSCF G (GR) = -384.553309653

First-Order Saddle Point for Disrotatory Ring Closure of (Z)-5-Allylidene-6-methylenecyclohexa-1,3-diene

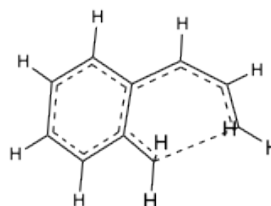

**CASSCF(10,10) Optimized Geometry**

|   |             |             |             |
|---|-------------|-------------|-------------|
| C | -0.13040766 | -0.79525889 | 0.16929035  |
| C | -0.03965338 | 0.62263066  | 0.27574730  |
| C | 1.16788472  | 1.33748358  | 0.06769248  |
| C | 2.38357594  | 0.84047147  | -0.39384731 |
| C | 2.95337139  | -0.42905684 | -0.20839688 |
| C | -1.26288249 | 1.37254054  | 0.25280588  |
| C | -2.45852926 | 0.77930926  | -0.02558482 |
| C | -2.50881172 | -0.61000066 | -0.32972722 |
| C | -1.37328023 | -1.36269079 | -0.25681958 |
| C | 0.95886701  | -1.63193785 | 0.48199768  |
| H | 1.03518708  | 2.39818122  | -0.05235878 |
| H | 2.89142633  | 1.49194802  | -1.08695058 |
| H | 3.12198827  | -0.81620474 | 0.76620493  |
| H | 3.68586795  | -0.74678160 | -0.93186186 |
| H | -1.41291392 | -2.41924165 | -0.44397828 |
| H | -3.44447430 | -1.06564440 | -0.59114650 |
| H | -3.35756727 | 1.36442122  | -0.05627810 |
| H | -1.21365711 | 2.43426182  | 0.40519492  |
| H | 1.47869620  | -1.44113644 | 1.39110508  |
| H | 0.90496448  | -2.67018343 | 0.20526395  |

CASSCF Energy = -384.639599963  
 NEVPT2 Energy = -386.275281590  
 NIMAG = 1  
 CASSCF H = -384.458718826  
 CASSCF G (HO) = -384.499835690  
 CASSCF G (GR) = -384.499668822

**M06-2X Optimized Geometry**

|   |             |             |             |
|---|-------------|-------------|-------------|
| C | 0.10625192  | 0.79470041  | 0.18996039  |
| C | 0.04722313  | -0.63397351 | 0.32214323  |
| C | -1.13675603 | -1.34350672 | 0.10579530  |
| C | -2.32350750 | -0.82710113 | -0.43782976 |
| C | -2.92905816 | 0.39210376  | -0.25765454 |
| C | 1.28846103  | -1.35174565 | 0.31899802  |
| C | 2.44838644  | -0.73823127 | -0.02457905 |
| C | 2.45064112  | 0.63529399  | -0.40765540 |
| C | 1.31164071  | 1.36763244  | -0.32945687 |
| C | -0.96016627 | 1.58456665  | 0.56744164  |
| H | -1.00672124 | -2.41731731 | 0.01532749  |

|   |             |             |             |
|---|-------------|-------------|-------------|
| H | -2.74600951 | -1.45762618 | -1.21837789 |
| H | -3.08348808 | 0.82926588  | 0.70695848  |
| H | -3.63054778 | 0.72654062  | -1.01470877 |
| H | 1.31591770  | 2.42550303  | -0.56104384 |
| H | 3.37355772  | 1.09657549  | -0.73172198 |
| H | 3.37224288  | -1.29981303 | -0.05166765 |
| H | 1.26835940  | -2.41420630 | 0.52768950  |
| H | -1.50469247 | 1.30432218  | 1.44938207  |
| H | -0.96777330 | 2.63868300  | 0.31660126  |

M06-2X Energy = -386.939860704  
 NIMAG = 1  
 M06-2X H = -386.764031440  
 M06-2X G (HO) = -386.805257708  
 M06-2X G (GR) = -386.805116483

First-Order Saddle Point for Conrotatory Ring Closure of  
 (Z)-5-Allylidene-6-methylenecyclohexa-1,3-diene

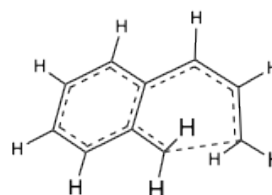

**CASSCF(10,10) Optimized Geometry**

|   |             |             |             |
|---|-------------|-------------|-------------|
| C | 0.91000069  | 1.70655024  | -0.64254059 |
| C | -0.17283928 | 0.81054255  | -0.31126162 |
| C | 0.00877764  | -0.60242123 | -0.26571958 |
| C | 1.34334820  | -1.20451877 | -0.47274241 |
| C | 2.48790517  | -0.72760553 | 0.09955209  |
| C | 2.54288350  | 0.36474647  | 1.01228692  |
| C | -1.08382244 | -1.41837888 | 0.00207846  |
| C | -2.34791779 | -0.88424009 | 0.26508733  |
| C | -2.52106869 | 0.49366225  | 0.26805143  |
| C | -1.44284165 | 1.32705318  | -0.01521565 |
| H | 3.49280979  | 0.77633568  | 1.29232471  |
| H | 1.70461466  | 0.62029971  | 1.62322022  |
| H | 3.42078770  | -1.17271674 | -0.19773615 |
| H | 1.40166402  | -2.06831517 | -1.10858287 |
| H | -1.58763673 | 2.39086202  | -0.03410488 |
| H | -3.48424791 | 0.91847825  | 0.47669615  |
| H | -3.17376378 | -1.53725906 | 0.47152976  |
| H | -0.94615316 | -2.48344066 | 0.02335797  |
| H | 0.75328736  | 2.76308646  | -0.53810424 |
| H | 1.69985820  | 1.39544549  | -1.28914709 |

CASSCF Energy = -384.638276522  
 NEVPT2 Energy = -386.259254090  
 NIMAG = 1  
 CASSCF H = -384.460556717  
 CASSCF G (HO) = -384.501919986  
 CASSCF G (GR) = -384.501819648

**UM06-2X Optimized Geometry**

|   |             |             |             |
|---|-------------|-------------|-------------|
| C | 0.94200188  | 1.67021717  | -0.61394889 |
| C | -0.15228019 | 0.79218088  | -0.28459695 |
| C | 0.00963705  | -0.62024774 | -0.25723095 |
| C | 1.33435773  | -1.22123143 | -0.45688639 |
| C | 2.46871471  | -0.69603654 | 0.08344432  |
| C | 2.48411060  | 0.41328892  | 0.95968655  |
| C | -1.09647748 | -1.42391150 | -0.01605135 |
| C | -2.34825017 | -0.87745093 | 0.24510106  |
| C | -2.50025443 | 0.50038221  | 0.27223083  |
| C | -1.41305488 | 1.32060720  | 0.01017133  |



|   |             |             |             |
|---|-------------|-------------|-------------|
| H | 3.41655024  | 0.89964017  | 1.20541240  |
| H | 1.63217672  | 0.64223242  | 1.57990638  |
| H | 3.42084069  | -1.12703621 | -0.20542184 |
| H | 1.39361677  | -2.12054813 | -1.05725432 |
| H | -1.54092470 | 2.39581154  | 0.00113702  |
| H | -3.46599096 | 0.93860225  | 0.48457590  |
| H | -3.19241967 | -1.52563805 | 0.43550678  |
| H | -0.96670065 | -2.49912629 | -0.01006975 |
| H | 0.83149187  | 2.73022349  | -0.43374758 |
| H | 1.70400623  | 1.35901097  | -1.30849120 |

UM06-2X Energy = -386.925618718  
 NIMAG = 1  
 <S<sup>2</sup>> = 0.9049  
 UM06-2X H = -386.753160888  
 UM06-2X G (HO) = -386.794557096  
 UM06-2X G (GR) = -386.794467684

Second-Order Saddle Point for Internal Rotation of  
 (Z)-5-Allylidene-6-methylenecyclohexa-1,3-diene

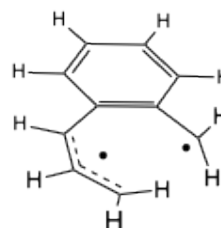

CASSCF(10,10) Optimized Geometry

|   |             |             |             |
|---|-------------|-------------|-------------|
| C | 1.09452387  | 1.43031237  | 0.00000000  |
| C | 0.01163766  | 0.51334313  | 0.00000000  |
| C | 0.34369215  | -0.86711195 | 0.00000000  |
| C | 1.69062384  | -1.24551299 | 0.00000000  |
| C | 2.72724851  | -0.32223653 | 0.00000000  |
| C | 2.41750988  | 1.03491268  | 0.00000000  |
| C | -0.64393578 | -1.96842876 | 0.00000000  |
| C | -1.29361753 | 1.15427992  | 0.00000000  |
| C | -2.66685502 | 0.78658685  | 0.00000000  |
| C | -3.35132400 | -0.39624095 | 0.00000000  |
| H | 3.19618567  | 1.77328870  | 0.00000000  |
| H | 3.74725898  | -0.65454653 | 0.00000000  |
| H | 1.92232903  | -2.29399624 | 0.00000000  |
| H | -0.92669741 | -2.44305625 | -0.91905171 |
| H | -0.92669741 | -2.44305625 | 0.91905171  |
| H | -4.42376248 | -0.36793488 | 0.00000000  |
| H | -2.89561883 | -1.35884598 | 0.00000000  |
| H | -3.29941145 | 1.65813920  | 0.00000000  |
| H | -1.18881110 | 2.22260270  | 0.00000000  |
| H | 0.87188186  | 2.47973237  | 0.00000000  |

CASSCF Energy = -384.619181857  
 NEVPT2 Energy = -386.235480741  
 NIMAG = 2  
 CASSCF H = -384.442725777  
 CASSCF G (HO) = -384.484516864  
 CASSCF G (GR) = -384.484452589

Second-Order Saddle Point for Internal Rotation of  
 (Z)-5-Allylidene-6-methylenecyclohexa-1,3-diene

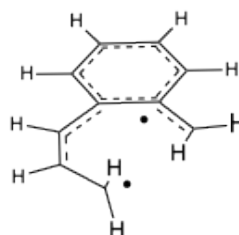

CASSCF(10,10) Optimized Geometry

|   |            |             |            |
|---|------------|-------------|------------|
| C | 1.38225598 | 1.10129057  | 0.00000000 |
| C | 2.67218715 | 0.70614676  | 0.00000000 |
| C | 3.34261662 | -0.60499849 | 0.00000000 |

|   |             |             |             |
|---|-------------|-------------|-------------|
| C | 0.02517146  | 0.50446848  | 0.00000000  |
| C | -0.37677562 | -0.88117720 | 0.00000000  |
| C | 0.47810180  | -1.98457839 | 0.00000000  |
| C | -1.78147453 | -1.16546883 | 0.00000000  |
| C | -2.74314254 | -0.18671979 | 0.00000000  |
| C | -2.34842437 | 1.15723668  | 0.00000000  |
| C | -0.99495285 | 1.46808074  | 0.00000000  |
| H | 3.74599368  | -0.99421235 | -0.91581380 |
| H | 3.74599368  | -0.99421235 | 0.91581380  |
| H | 3.36736185  | 1.53306363  | 0.00000000  |
| H | 0.05793125  | -2.97087254 | 0.00000000  |
| H | 1.53717393  | -1.90694036 | 0.00000000  |
| H | -0.71600693 | 2.50393949  | 0.00000000  |
| H | -3.07810586 | 1.94320105  | 0.00000000  |
| H | -3.78332036 | -0.45029833 | 0.00000000  |
| H | -2.07673543 | -2.19724573 | 0.00000000  |
| H | 1.30086560  | 2.17285882  | 0.00000000  |

CASSCF Energy = -384.611819386  
 NEVPT2 Energy = -386.225228651  
 NIMAG = 2  
 CASSCF H = -384.435625238  
 CASSCF G (HO) = -384.477060969  
 CASSCF G (GR) = -384.476976618

### 1,2-Dihydronaphthalene 7

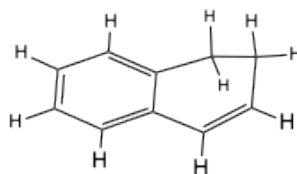

### CASSCF(10,10) Optimized Geometry

|   |             |             |             |
|---|-------------|-------------|-------------|
| C | -1.27472008 | -1.40211610 | -0.29351206 |
| C | -2.45330239 | -0.63240004 | 0.36877172  |
| C | -2.37599717 | 0.83911032  | 0.05926348  |
| C | -1.19974808 | 1.44388268  | -0.14810664 |
| C | 0.07187428  | 0.70561694  | -0.08791404 |
| C | 1.29304810  | 1.37180532  | 0.00625291  |
| C | 2.48631724  | 0.66145828  | 0.09586400  |
| C | 2.46278683  | -0.72755063 | 0.09036191  |
| C | 1.24575336  | -1.39938469 | -0.01156208 |
| C | 0.04839152  | -0.69892570 | -0.10201522 |
| H | 1.23242880  | -2.47377739 | -0.02380609 |
| H | 3.37773301  | -1.28404797 | 0.16237150  |
| H | 3.41932159  | 1.18648516  | 0.17165918  |
| H | 1.30903920  | 2.44597415  | 0.01593269  |
| H | -1.15626587 | 2.50302436  | -0.32412768 |
| H | -3.28413271 | 1.41315432  | 0.06309532  |
| H | -3.39204593 | -1.04717553 | 0.02187721  |
| H | -2.42645318 | -0.77577998 | 1.44680083  |
| H | -1.22810489 | -2.41200560 | 0.09436891  |
| H | -1.47600169 | -1.47876133 | -1.35912499 |

CASSCF Energy = -384.741668453  
 NEVPT2 Energy = -386.368694965  
 NIMAG = 0  
 CASSCF H = -384.561747286  
 CASSCF G (HO) = -384.601958955  
 CASSCF G (GR) = -384.601922402

## Reaction H

### 1,2-Divinylbenzene

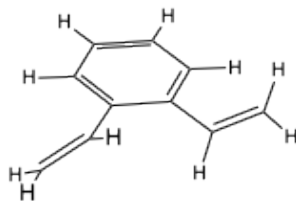

#### CASSCF(10,10) Optimized Geometry

|   |             |             |             |
|---|-------------|-------------|-------------|
| C | -2.67729855 | 0.25639510  | -1.64673105 |
| C | 2.67729855  | -0.25639510 | -1.64673105 |
| C | -1.44871974 | -0.22292414 | -1.42540064 |
| C | 1.44871974  | 0.22292414  | -1.42540064 |
| C | -1.36749184 | -0.19824675 | 1.06969902  |
| C | 1.36749184  | 0.19824675  | 1.06969902  |
| C | -0.69748092 | -0.09594178 | -0.15307717 |
| C | 0.69748092  | 0.09594178  | -0.15307717 |
| C | -0.68776488 | -0.10028079 | 2.27665219  |
| C | 0.68776488  | 0.10028079  | 2.27665219  |
| H | -3.21650743 | 0.81523067  | -0.90502867 |
| H | 3.21650743  | -0.81523067 | -0.90502867 |
| H | -3.16488290 | 0.10682943  | -2.59098473 |
| H | 3.16488290  | -0.10682943 | -2.59098473 |
| H | -2.42438436 | -0.38029805 | 1.07277998  |
| H | 2.42438436  | 0.38029805  | 1.07277998  |
| H | -1.22424781 | -0.18523271 | 3.20220217  |
| H | 1.22424781  | 0.18523271  | 3.20220217  |
| H | -0.95572168 | -0.75012946 | -2.22138992 |
| H | 0.95572168  | 0.75012946  | -2.22138992 |

CASSCF Energy = -384.718183787

NEVPT2 Energy = -386.336237146

NIMAG = 0

CASSCF H = -384.535717925

CASSCF G (HO) = -384.578775810

CASSCF G (GR) = -384.578370026

### First-Order Saddle Point for Disrotatory Ring Closure of Ortho-divinylbenzene

#### CASSCF(10,10) Optimized Geometry

|   |             |             |             |
|---|-------------|-------------|-------------|
| C | 2.44184651  | -1.10175370 | 0.13990814  |
| C | 2.46815641  | 1.04551679  | 0.10646810  |
| C | 1.16125595  | 1.45177003  | -0.23498826 |
| C | 1.12530518  | -1.48636138 | -0.18935246 |
| C | -0.02867919 | -0.71652072 | 0.05090331  |
| C | -0.01112326 | 0.71823641  | 0.02861017  |
| C | -1.27809509 | 1.40555431  | -0.01256341 |
| C | -1.31209668 | -1.37358404 | 0.03063160  |
| C | -2.46361895 | 0.74553174  | 0.03518261  |
| C | -2.48110444 | -0.68357881 | 0.05738783  |
| H | 3.23896323  | -1.60189014 | -0.38695667 |
| H | 3.27688481  | 1.50932861  | -0.43565552 |
| H | 2.68309865  | 0.93925209  | 1.14572694  |
| H | 2.65939120  | -0.96833501 | 1.17552999  |
| H | 1.04784061  | 2.29921859  | -0.88882792 |
| H | 0.99092612  | -2.35076564 | -0.81651971 |
| H | -1.26354989 | 2.47794543  | -0.06212458 |

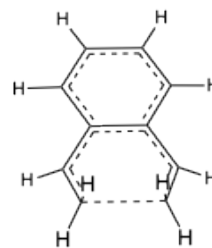

|   |             |             |            |
|---|-------------|-------------|------------|
| H | -1.32380939 | -2.44704729 | 0.01442991 |
| H | -3.38830380 | 1.29008991  | 0.03525534 |
| H | -3.41883167 | -1.20507603 | 0.07402613 |

CASSCF Energy = -384.634618097  
 NEVPT2 Energy = -386.273409333  
 NIMAG = 1  
 CASSCF H = -384.453483926  
 CASSCF G (HO) = -384.494746724  
 CASSCF G (GR) = -384.494347724

### M06-2X Optimized Geometry

|   |             |             |             |
|---|-------------|-------------|-------------|
| C | 2.36929683  | -1.04066543 | 0.25907916  |
| C | 2.48768668  | 1.01667440  | -0.01205954 |
| C | 1.16866673  | 1.41639185  | -0.24234556 |
| C | 1.13091447  | -1.47226149 | -0.20601746 |
| C | -0.03777984 | -0.73764293 | 0.01967446  |
| C | -0.00116292 | 0.70602139  | 0.07570592  |
| C | -1.25541723 | 1.39846874  | 0.09195043  |
| C | -1.31683028 | -1.37153259 | -0.06763144 |
| C | -2.44412490 | 0.74540661  | 0.09403392  |
| C | -2.47713144 | -0.67251174 | 0.00388632  |
| H | 3.26466240  | -1.52691688 | -0.11065555 |
| H | 3.23509373  | 1.42351739  | -0.68922344 |
| H | 2.85136333  | 0.96980043  | 0.99794730  |
| H | 2.40628837  | -0.81095833 | 1.31028424  |
| H | 1.01424930  | 2.25876344  | -0.91118104 |
| H | 1.06820577  | -2.31867644 | -0.88162863 |
| H | -1.23133601 | 2.48031825  | 0.12317954  |
| H | -1.33494194 | -2.45081438 | -0.15203038 |
| H | -3.37053715 | 1.30172782  | 0.14015687  |
| H | -3.42748639 | -1.18803278 | -0.02064726 |

M06-2X Energy = -386.938673614  
 NIMAG = 1  
 M06-2X H = -386.762997191  
 M06-2X G (HO) = -386.804312973  
 M06-2X G (GR) = -386.803936650

### First-Order Saddle Point for Conrotatory Ring Closure of Ortho-divinylbenzene

#### CASSCF(10,10) Optimized Geometry

|   |             |             |             |
|---|-------------|-------------|-------------|
| C | 0.69193023  | 0.05045102  | 2.48646975  |
| C | -0.69193023 | -0.05045092 | 2.48646975  |
| C | 1.38296664  | 0.09229597  | 1.27407777  |
| C | -1.38296664 | -0.09229605 | 1.27407777  |
| C | 0.71258336  | 0.03504508  | 0.05422030  |
| C | -0.71258336 | -0.03504520 | 0.05422028  |
| C | 1.45056689  | 0.06885524  | -1.21586382 |
| C | -1.45056689 | -0.06885528 | -1.21586382 |
| C | 0.86487758  | -0.45128596 | -2.40452218 |
| C | -0.86487758 | 0.45128602  | -2.40452218 |
| H | 1.23318779  | 0.08886535  | 3.41225958  |
| H | -1.23318779 | -0.08886517 | 3.41225958  |
| H | 2.45553994  | 0.14844516  | 1.27765644  |
| H | -2.45553994 | -0.14844528 | 1.27765644  |
| H | 2.23349595  | 0.80055976  | -1.30288303 |

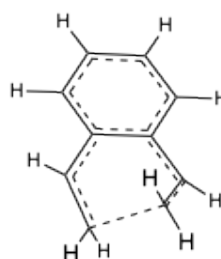

|   |             |             |             |
|---|-------------|-------------|-------------|
| H | -2.23349595 | -0.80055970 | -1.30288303 |
| H | 0.49317604  | -1.45870352 | -2.37243557 |
| H | -0.49317595 | 1.45870352  | -2.37243557 |
| H | 1.37899685  | -0.23140888 | -3.32599473 |
| H | -1.37899697 | 0.23140910  | -3.32599473 |

CASSCF Energy = -384.625158031  
 NEVPT2 Energy = -386.255022272  
 NIMAG = 1  
 CASSCF H = -384.445885383  
 CASSCF G (HO) = -384.486238188  
 CASSCF G (GR) = -384.486144460

### UM06-2X Optimized Geometry

|   |             |             |             |
|---|-------------|-------------|-------------|
| C | 0.01101011  | -0.69185953 | 2.47795455  |
| C | -0.01101011 | 0.69185953  | 2.47795455  |
| C | 0.01350114  | -1.38240774 | 1.26962332  |
| C | -0.01350114 | 1.38240774  | 1.26962332  |
| C | -0.00256283 | -0.71299391 | 0.05270185  |
| C | 0.00256283  | 0.71299391  | 0.05270185  |
| C | 0.01101011  | -1.43335552 | -1.21996807 |
| C | -0.01101011 | 1.43335552  | -1.21996807 |
| C | -0.50421379 | -0.84908625 | -2.38726459 |
| C | 0.50421379  | 0.84908625  | -2.38726459 |
| H | 0.01954958  | -1.23849592 | 3.41094410  |
| H | -0.01954958 | 1.23849592  | 3.41094410  |
| H | 0.00502163  | -2.46525625 | 1.26840181  |
| H | -0.00502163 | 2.46525625  | 1.26840181  |
| H | 0.67940553  | -2.28214193 | -1.30115613 |
| H | -0.67940553 | 2.28214193  | -1.30115613 |
| H | -1.47267733 | -0.36764347 | -2.34948517 |
| H | 1.47267733  | 0.36764347  | -2.34948517 |
| H | -0.30914335 | -1.35350762 | -3.32728295 |
| H | 0.30914335  | 1.35350762  | -3.32728295 |

UM06-2X Energy = -386.920554962  
 NIMAG = 1  
 <S<sup>2</sup>> = 0.8039  
 UM06-2X H = -386.747427893  
 UM06-2X G (HO) = -386.788148210  
 UM06-2X G (GR) = -386.788035895

### Second-Order Saddle Point for Internal Rotation of Ortho-divinylbenzene

#### CASSCF(10,10) Optimized Geometry

|   |             |             |             |
|---|-------------|-------------|-------------|
| C | -2.50322383 | -1.53792662 | 0.00000000  |
| C | -2.47578638 | 1.53911453  | 0.00000000  |
| C | -1.14040165 | 1.65542835  | 0.00000000  |
| C | -1.04245656 | -1.67209548 | 0.00000000  |
| C | -0.00329859 | 0.70812612  | 0.00000000  |
| C | 0.01574527  | -0.74112136 | 0.00000000  |
| C | 1.23666317  | 1.36942952  | 0.00000000  |
| C | 1.31318636  | -1.36427969 | 0.00000000  |
| C | 2.46534927  | 0.72740560  | 0.00000000  |
| C | 2.49587543  | -0.67183936 | 0.00000000  |
| H | -3.06495206 | 2.43690699  | 0.00000000  |
| H | -3.05334561 | -1.64072019 | -0.91659796 |
| H | -3.05334561 | -1.64072019 | 0.91659796  |

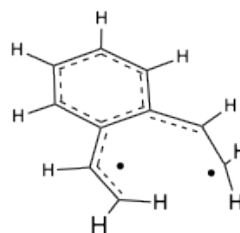

|   |             |             |            |
|---|-------------|-------------|------------|
| H | -3.01110714 | 0.61916494  | 0.00000000 |
| H | -0.78906201 | 2.67136997  | 0.00000000 |
| H | -0.71086382 | -2.69711715 | 0.00000000 |
| H | 1.23172791  | 2.44193905  | 0.00000000 |
| H | 1.34363468  | -2.43630177 | 0.00000000 |
| H | 3.37172181  | 1.30049115  | 0.00000000 |
| H | 3.42945726  | -1.20077152 | 0.00000000 |

CASSCF Energy = -384.608111174  
 NEVPT2 Energy = -386.224772631  
 NIMAG = 2  
 CASSCF H = -384.431816438  
 CASSCF G (HO) = -384.474071814  
 CASSCF G (GR) = -384.473754352

## Reaction I

### (E)-2-Allylidene-3-methylene-2,3-dihydronaphthalene

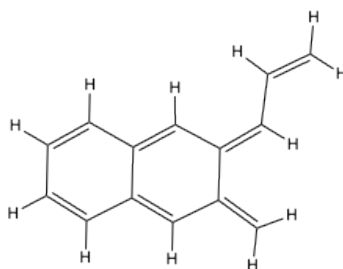

### CASSCF(14,14) Optimized Geometry

|   |             |             |            |
|---|-------------|-------------|------------|
| C | 3.47775165  | -0.99995688 | 0.00000000 |
| C | 3.78283523  | 0.41985663  | 0.00000000 |
| C | 2.79087601  | 1.33658071  | 0.00000000 |
| C | 1.39668856  | 0.93360646  | 0.00000000 |
| C | 1.08975397  | -0.49178187 | 0.00000000 |
| C | 2.19668541  | -1.42936019 | 0.00000000 |
| C | -0.20949664 | -0.90748644 | 0.00000000 |
| C | -1.33725347 | 0.00172933  | 0.00000000 |
| C | -1.02448739 | 1.45409771  | 0.00000000 |
| C | 0.37734709  | 1.83516641  | 0.00000000 |
| C | -1.95664110 | 2.44359203  | 0.00000000 |
| C | -2.62909116 | -0.45635633 | 0.00000000 |
| C | -3.07684221 | -1.83652513 | 0.00000000 |
| C | -4.37603940 | -2.18350009 | 0.00000000 |
| H | 1.97358904  | -2.47965829 | 0.00000000 |
| H | 0.60153041  | 2.88530989  | 0.00000000 |
| H | -3.01118221 | 2.26464124  | 0.00000000 |
| H | -1.64808311 | 3.47072454  | 0.00000000 |
| H | -4.67789735 | -3.21275548 | 0.00000000 |
| H | -5.15752115 | -1.44607745 | 0.00000000 |
| H | -2.34638681 | -2.62176887 | 0.00000000 |
| H | -3.42370452 | 0.26335438  | 0.00000000 |
| H | -0.40070857 | -1.96058224 | 0.00000000 |
| H | 3.01630182  | 2.38630624  | 0.00000000 |
| H | 4.80964647  | 0.73114152  | 0.00000000 |
| H | 4.28615813  | -1.70543496 | 0.00000000 |

CASSCF Energy = -537.422612753  
 NEVPT2 Energy = -539.660951919  
 NIMAG = 0  
 CASSCF H = -537.191474074  
 CASSCF G (HO) = -537.239295415  
 CASSCF G (GR) = -537.239051852

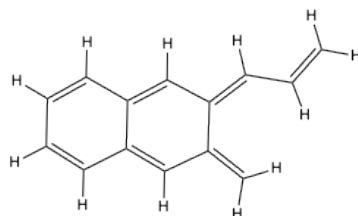

(Z)-2-Allylidene-3-methylene-2,3-dihydronaphthalene

CASSCF(14,14) Optimized Geometry

|   |             |             |            |
|---|-------------|-------------|------------|
| C | 3.56475583  | -1.26592833 | 0.00000000 |
| C | 3.89026847  | 0.14980680  | 0.00000000 |
| C | 2.91252604  | 1.08169264  | 0.00000000 |
| C | 1.51288548  | 0.69764572  | 0.00000000 |
| C | 1.18666068  | -0.72133684 | 0.00000000 |
| C | 2.27772727  | -1.67695850 | 0.00000000 |
| C | -0.11971729 | -1.10613424 | 0.00000000 |
| C | -1.24611125 | -0.18734132 | 0.00000000 |
| C | -0.91047517 | 1.25981849  | 0.00000000 |
| C | 0.50399884  | 1.60899597  | 0.00000000 |
| C | -1.78941366 | 2.29782873  | 0.00000000 |
| C | -2.48339090 | -0.78749985 | 0.00000000 |
| C | -3.83691296 | -0.26750860 | 0.00000000 |
| C | -4.91043815 | -1.07945758 | 0.00000000 |
| H | 2.03837672  | -2.72365087 | 0.00000000 |
| H | 0.74329856  | 2.65564424  | 0.00000000 |
| H | -2.84834966 | 2.19675976  | 0.00000000 |
| H | -1.41408977 | 3.30274016  | 0.00000000 |
| H | -5.90716991 | -0.68324864 | 0.00000000 |
| H | -4.81043968 | -2.14921588 | 0.00000000 |
| H | -4.01582107 | 0.78457344  | 0.00000000 |
| H | -2.45445523 | -1.86252695 | 0.00000000 |
| H | -0.34694347 | -2.15519542 | 0.00000000 |
| H | 3.15375891  | 2.12791973  | 0.00000000 |
| H | 4.92167035  | 0.44567105  | 0.00000000 |
| H | 4.36326924  | -1.98260981 | 0.00000000 |

CASSCF Energy = -537.416703810

NEVPT2 Energy = -539.656072570

NIMAG = 0

CASSCF H = -537.185303498

CASSCF G (HO) = -537.233410212

CASSCF G (GR) = -537.232830226

First-Order Saddle Point for Disrotatory Ring Closure of (Z)-2-Allylidene-3-methylene-2,3-dihydronaphthalene

CASSCF(14,14) Optimized Geometry

|   |             |             |             |
|---|-------------|-------------|-------------|
| C | 0.05075638  | -1.32025654 | -0.29319591 |
| C | 1.27286928  | -0.68045770 | -0.14557207 |
| C | 1.29688951  | 0.73377430  | 0.06695072  |
| C | 0.10344568  | 1.44070158  | 0.02672503  |
| C | -1.12838348 | 0.81567127  | -0.26035660 |
| C | -1.17731627 | -0.62056818 | -0.27415774 |
| C | -2.34881409 | -1.36583024 | 0.04651219  |
| C | -3.56426502 | -0.90801347 | 0.54736163  |
| C | -4.22897566 | 0.30911287  | 0.34165434  |
| C | -2.26522054 | 1.59912079  | -0.55891507 |
| C | 2.56544222  | 1.37976599  | 0.27342770  |
| C | 3.72073221  | 0.66609063  | 0.26890151  |
| C | 3.69699776  | -0.75395417 | 0.05567751  |
| C | 2.51896892  | -1.39963703 | -0.14249572 |

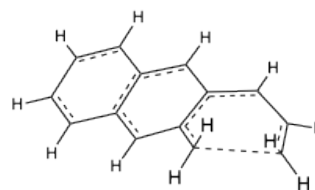

|   |             |             |             |
|---|-------------|-------------|-------------|
| H | -4.95762926 | 0.60278424  | 1.07787663  |
| H | -4.41987384 | 0.68559985  | -0.63214442 |
| H | -4.00684899 | -1.56253969 | 1.28134292  |
| H | -2.16240569 | -2.41191508 | 0.21231312  |
| H | -2.85018539 | 1.32041986  | -1.40385214 |
| H | -2.23172261 | 2.65449122  | -0.35624720 |
| H | 0.12467142  | 2.51014366  | 0.12476619  |
| H | 2.49981626  | -2.46181669 | -0.29886365 |
| H | 4.62056745  | -1.30032168 | 0.05573939  |
| H | 4.66161530  | 1.15786363  | 0.42506915  |
| H | 2.58196986  | 2.44189537  | 0.43035320  |
| H | 0.03031151  | -2.39258049 | -0.35098744 |

CASSCF Energy = -537.378602450

NEVPT2 Energy = -539.641701980

NIMAG = 1

CASSCF H = -537.147225624

CASSCF G (HO) = -537.194605093

CASSCF G (GR) = -537.194093768

### M06-2X Optimized Geometry

|   |             |             |             |
|---|-------------|-------------|-------------|
| C | 0.06181352  | -1.33851821 | -0.37184973 |
| C | 1.25781560  | -0.68957141 | -0.18128141 |
| C | 1.26132676  | 0.73050786  | 0.09760804  |
| C | 0.08018445  | 1.42919028  | 0.05181295  |
| C | -1.13598616 | 0.79933494  | -0.31775970 |
| C | -1.17609060 | -0.64804903 | -0.32083874 |
| C | -2.32869127 | -1.35279540 | 0.03733127  |
| C | -3.49239398 | -0.83015768 | 0.63215682  |
| C | -4.17437886 | 0.33684283  | 0.42183554  |
| C | -2.23553426 | 1.53219963  | -0.70645227 |
| C | 2.51983411  | 1.37227852  | 0.36052746  |
| C | 3.67456616  | 0.67177766  | 0.34818708  |
| C | 3.67159138  | -0.73638078 | 0.06922720  |
| C | 2.51435362  | -1.38599537 | -0.18374769 |
| H | -4.85140840 | 0.67842979  | 1.19693719  |
| H | -4.35510727 | 0.75593795  | -0.54587956 |
| H | -3.83605209 | -1.42622606 | 1.47640696  |
| H | -2.17105816 | -2.41608577 | 0.18742474  |
| H | -2.86102646 | 1.13593711  | -1.48438166 |
| H | -2.25437132 | 2.60590790  | -0.56659992 |
| H | 0.08908545  | 2.50560566  | 0.17899409  |
| H | 2.50915893  | -2.44864295 | -0.39178449 |
| H | 4.60986446  | -1.27419104 | 0.06416049  |
| H | 4.61502929  | 1.16721233  | 0.54740525  |
| H | 2.51809973  | 2.43549288  | 0.56569529  |
| H | 0.05329776  | -2.41753078 | -0.47535281 |

M06-2X Energy = -540.561164578

NIMAG = 1

M06-2X H = -540.336158287

M06-2X G (HO) = -540.383708502

M06-2X G (GR) = -540.383234823

### First-Order Saddle Point for Conrotatory Ring Closure of (Z)-2-Allylidene-3-methylene-2,3-dihydronaphthalene

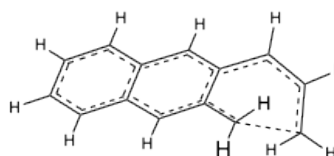



### CASSCF(14,14) Optimized Geometry

|   |             |             |             |
|---|-------------|-------------|-------------|
| C | 0.05812966  | -1.30231708 | -0.20663276 |
| C | -1.22651890 | -0.68906885 | -0.05845683 |
| C | -1.30307732 | 0.71852706  | -0.04504655 |
| C | -0.10681726 | 1.47184179  | -0.21360014 |
| C | 1.12837779  | 0.87505494  | -0.39082826 |
| C | 1.20562338  | -0.57575735 | -0.34608558 |
| C | 2.51322029  | -1.26028770 | -0.42498093 |
| C | 3.62047609  | -0.86797128 | 0.27382650  |
| C | 3.64984930  | 0.19735134  | 1.21208093  |
| C | 2.29624099  | 1.67878282  | -0.61183736 |
| C | -2.56683675 | 1.33764718  | 0.11646918  |
| C | -3.70498057 | 0.58164319  | 0.25996829  |
| C | -3.62634977 | -0.82724162 | 0.24673699  |
| C | -2.40912324 | -1.44785556 | 0.08996841  |
| H | 4.58820509  | 0.53400285  | 1.60739202  |
| H | 2.76703629  | 0.51611967  | 1.72201918  |
| H | 4.54825136  | -1.37037359 | 0.06468778  |
| H | 2.58060869  | -2.12127447 | -1.06326718 |
| H | 3.13978458  | 1.29456119  | -1.13892874 |
| H | 2.20642187  | 2.74605232  | -0.54455008 |
| H | -0.17771505 | 2.54334045  | -0.24018713 |
| H | -2.34711918 | -2.52000786 | 0.08136147  |
| H | -4.51890375 | -1.41204110 | 0.35987629  |
| H | -4.65759316 | 1.06054308  | 0.38175591  |
| H | -2.62604678 | 2.40991872  | 0.12365954  |
| H | 0.11454869  | -2.37524408 | -0.18197151 |

CASSCF Energy = -537.387350020

NEVPT2 Energy = -539.639535886

NIMAG = 1

CASSCF H = -537.157984155

CASSCF G (HO) = -537.205177305

CASSCF G (GR) = -537.204753106

### UM06-2X Optimized Geometry

|   |             |             |             |
|---|-------------|-------------|-------------|
| C | 0.05001606  | -1.31484572 | -0.22341128 |
| C | -1.22288408 | -0.69850692 | -0.07306653 |
| C | -1.28877989 | 0.71525933  | -0.02959003 |
| C | -0.09185665 | 1.45808513  | -0.17739725 |
| C | 1.13483790  | 0.85546157  | -0.35781846 |
| C | 1.20263435  | -0.59382714 | -0.33729486 |
| C | 2.50270948  | -1.27008669 | -0.41158834 |
| C | 3.60392841  | -0.82618818 | 0.25900225  |
| C | 3.59170327  | 0.25285537  | 1.16402011  |
| C | 2.30946242  | 1.64678749  | -0.57533275 |
| C | -2.54502308 | 1.33597605  | 0.13849186  |
| C | -3.68541268 | 0.58556697  | 0.25932930  |
| C | -3.61817721 | -0.81909189 | 0.21559710  |
| C | -2.40941981 | -1.44618285 | 0.05201171  |
| H | 4.51929161  | 0.66363663  | 1.53476592  |
| H | 2.68864639  | 0.53795260  | 1.67915460  |
| H | 4.55396388  | -1.30891584 | 0.05834833  |
| H | 2.56953969  | -2.16293056 | -1.02035252 |
| H | 3.13558238  | 1.26554674  | -1.14986801 |
| H | 2.25075317  | 2.71606822  | -0.42857357 |
| H | -0.15524130 | 2.54009549  | -0.18968585 |
| H | -2.35137217 | -2.52709425 | 0.01960505  |
| H | -4.52409512 | -1.40184538 | 0.31130995  |
| H | -4.64298750 | 1.07173595  | 0.38796616  |

H -2.59285665 2.41743254 0.16836475  
 H 0.10047143 -2.39789512 -0.21551080

UM06-2X Energy = -540.561379117  
 NIMAG = 1  
 <S<sup>2</sup>> = 0.8620  
 UM06-2X H = -540.338919141  
 UM06-2X G (HO) = -540.386358779  
 UM06-2X G (GR) = -540.385915062

Second-Order Saddle Point for Internal Rotation of  
 (Z)-2-Allylidene-3-methylene-2,3-dihydronaphthalene

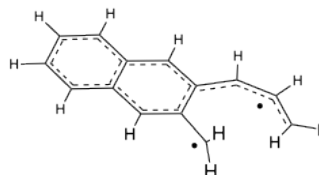

**CASSCF(14,14) Optimized Geometry**

|   |             |             |             |
|---|-------------|-------------|-------------|
| C | 2.11615109  | 1.98386288  | 0.00000000  |
| C | 0.99593520  | 1.01860690  | 0.00000000  |
| C | 1.16531527  | -0.42071962 | 0.00000000  |
| C | 2.38659525  | -1.19994378 | 0.00000000  |
| C | 3.79582691  | -0.99458808 | 0.00000000  |
| C | 4.61815262  | 0.09527795  | 0.00000000  |
| C | -0.00092867 | -1.19041610 | 0.00000000  |
| C | -1.30339718 | -0.64700377 | 0.00000000  |
| C | -2.46839929 | -1.46473753 | 0.00000000  |
| C | -3.71496010 | -0.89916146 | 0.00000000  |
| C | -3.85939384 | 0.51119691  | 0.00000000  |
| C | -2.75060630 | 1.31737864  | 0.00000000  |
| C | -1.44994855 | 0.75252742  | 0.00000000  |
| C | -0.27070487 | 1.54585314  | 0.00000000  |
| H | 2.51841807  | 2.35663509  | -0.92062557 |
| H | 2.51841807  | 2.35663509  | 0.92062557  |
| H | 5.67905092  | -0.06422526 | 0.00000000  |
| H | 4.28537893  | 1.10670185  | 0.00000000  |
| H | 4.31942081  | -1.93561924 | 0.00000000  |
| H | 2.16139483  | -2.24956536 | 0.00000000  |
| H | -0.38040307 | 2.61446476  | 0.00000000  |
| H | -2.85707045 | 2.38595343  | 0.00000000  |
| H | -4.84135246 | 0.94384873  | 0.00000000  |
| H | -4.58940172 | -1.52122891 | 0.00000000  |
| H | -2.35705400 | -2.53276944 | 0.00000000  |
| H | 0.09071220  | -2.25967717 | 0.00000000  |

CASSCF Energy = -537.365745891  
 NEVPT2 Energy = -539.612021341  
 NIMAG = 2  
 CASSCF H = -537.137809488  
 CASSCF G (HO) = -537.185607776  
 CASSCF G (GR) = -537.185245534

Second-Order Saddle Point for Internal Rotation of  
 (Z)-2-Allylidene-3-methylene-2,3-dihydronaphthalene

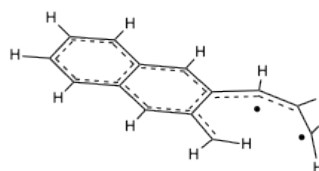

**CASSCF(14,14) Optimized Geometry**

|   |             |             |            |
|---|-------------|-------------|------------|
| C | -4.65063261 | 0.13107446  | 0.00000000 |
| C | -3.77438934 | -1.05263548 | 0.00000000 |
| C | -2.43930938 | -1.23595285 | 0.00000000 |
| C | -2.05228259 | 1.95871990  | 0.00000000 |
| C | -1.18969301 | -0.43092081 | 0.00000000 |
| C | -1.02011585 | 1.02448292  | 0.00000000 |
| C | -0.05053863 | -1.19953177 | 0.00000000 |

|   |             |             |             |
|---|-------------|-------------|-------------|
| C | 0.30098495  | 1.53108881  | 0.00000000  |
| C | 1.27788104  | -0.67926872 | 0.00000000  |
| C | 1.44920098  | 0.72174312  | 0.00000000  |
| C | 2.41443226  | -1.51794095 | 0.00000000  |
| C | 2.76762797  | 1.25612880  | 0.00000000  |
| C | 3.68077351  | -0.98119366 | 0.00000000  |
| C | 3.85648239  | 0.42322344  | 0.00000000  |
| H | -5.11447640 | 0.44614240  | -0.91569203 |
| H | -5.11447640 | 0.44614240  | 0.91569203  |
| H | -4.32672161 | -1.98119753 | 0.00000000  |
| H | -3.08111488 | 1.69671951  | 0.00000000  |
| H | -2.18643843 | -2.28033588 | 0.00000000  |
| H | -1.81126484 | 3.00345546  | 0.00000000  |
| H | -0.14984501 | -2.26818306 | 0.00000000  |
| H | 0.42566252  | 2.59727406  | 0.00000000  |
| H | 2.27997508  | -2.58344052 | 0.00000000  |
| H | 2.89929885  | 2.32176305  | 0.00000000  |
| H | 4.53930839  | -1.62465063 | 0.00000000  |
| H | 4.84817944  | 0.83335418  | 0.00000000  |

CASSCF Energy = -537.358896121  
 NEVPT2 Energy = -539.601906162  
 NIMAG = 2  
 CASSCF H = -537.131298116  
 CASSCF G (HO) = -537.178633084  
 CASSCF G (GR) = -537.178243754

## Reaction J

### 2,3-Divinyl naphthalene

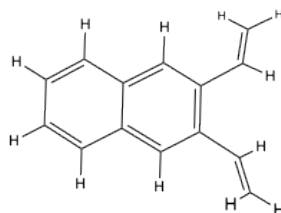

### CASSCF(14,14) Optimized Geometry

|   |             |             |             |
|---|-------------|-------------|-------------|
| C | -2.64414239 | -0.35017309 | 2.84389294  |
| C | 2.64414239  | 0.35017309  | 2.84389294  |
| C | -1.45122242 | 0.19779898  | 2.59076656  |
| C | 1.45122242  | -0.19779898 | 2.59076656  |
| C | -0.71319604 | 0.08407348  | 1.31002343  |
| C | 0.71319604  | -0.08407348 | 1.31002343  |
| C | -1.37611806 | 0.17187931  | 0.11127780  |
| C | 1.37611806  | -0.17187931 | 0.11127780  |
| C | -0.69867796 | 0.08649664  | -1.13366484 |
| C | 0.69867796  | -0.08649664 | -1.13366484 |
| C | -1.38576114 | 0.17508884  | -2.37537729 |
| C | 1.38576114  | -0.17508884 | -2.37537729 |
| C | -0.70323825 | 0.08912260  | -3.55855810 |
| C | 0.70323825  | -0.08912260 | -3.55855810 |
| H | -3.13001013 | -0.20125787 | 3.78921307  |
| H | 3.13001013  | 0.20125787  | 3.78921307  |
| H | -0.97836375 | 0.77674866  | 3.36334313  |
| H | 0.97836375  | -0.77674866 | 3.36334313  |
| H | -3.15392137 | -0.96447706 | 2.12561072  |
| H | 3.15392137  | 0.96447706  | 2.12561072  |
| H | -2.43679261 | 0.33548084  | 0.10591352  |
| H | 2.43679261  | -0.33548084 | 0.10591352  |
| H | -2.45123363 | 0.30932468  | -2.37270700 |
| H | 2.45123363  | -0.30932468 | -2.37270700 |
| H | -1.22945869 | 0.15608288  | -4.49141800 |

H 1.22945869 -0.15608288 -4.49141800

CASSCF Energy = -537.464714930

NEVPT2 Energy = -539.712042933

NIMAG = 0

CASSCF H = -537.230985072

CASSCF G (HO) = -537.279968437

CASSCF G (GR) = -537.279287780

### First-Order Saddle Point for Disrotatory Ring Closure of 2,3-Divinyl naphthalene

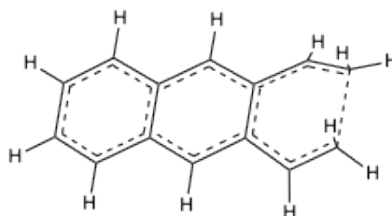

#### CASSCF(14,14) Optimized Geometry

|   |             |             |             |
|---|-------------|-------------|-------------|
| C | -3.66989654 | 1.05209180  | 0.19260331  |
| C | -2.37842761 | 1.47565343  | -0.19589085 |
| C | -1.19520925 | 0.72508019  | 0.01950514  |
| C | -1.19957725 | -0.71803388 | -0.00736421 |
| C | -2.38700681 | -1.45306577 | -0.25154786 |
| C | -3.67688691 | -1.03728145 | 0.15098533  |
| C | 0.05136785  | -1.38683283 | -0.05477576 |
| C | 1.25982751  | -0.72066928 | -0.00637804 |
| C | 1.26412376  | 0.71305902  | 0.01997384  |
| C | 0.05965216  | 1.38773899  | -0.00357143 |
| C | 2.53189346  | 1.39930886  | 0.05085622  |
| C | 3.69843778  | 0.70814748  | 0.05663354  |
| C | 3.69412680  | -0.73161340 | 0.03024305  |
| C | 2.52347224  | -1.41514501 | -0.00078191 |
| H | -4.50961021 | -1.48379757 | -0.36943183 |
| H | -3.84625812 | -0.97790778 | 1.20400324  |
| H | -2.30361112 | -2.26989444 | -0.94653548 |
| H | 0.06403927  | 2.46176859  | -0.02057778 |
| H | 2.51897833  | -2.48874367 | -0.02117748 |
| H | 4.62912344  | -1.25818865 | 0.03435699  |
| H | 4.63656995  | 1.22863621  | 0.07991448  |
| H | 2.53382082  | 2.47291365  | 0.06982706  |
| H | 0.04937362  | -2.45949866 | -0.11142316 |
| H | -2.29112288 | 2.31748731  | -0.85981615 |
| H | -4.50109961 | 1.52355005  | -0.30785580 |
| H | -3.83731275 | 0.95227171  | 1.24287716  |

CASSCF Energy = -537.372075351

NEVPT2 Energy = -539.640649975

NIMAG = 1

CASSCF H = -537.140262992

CASSCF G (HO) = -537.187565236

CASSCF G (GR) = -537.186913499

### First-Order Saddle Point for Conrotatory Ring Closure of 2,3-Divinyl naphthalene

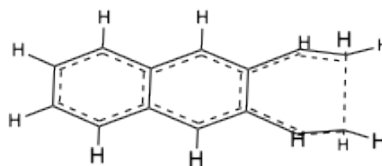

#### CASSCF(14,14) Optimized Geometry

|   |             |             |             |
|---|-------------|-------------|-------------|
| C | -0.84590352 | 0.47145104  | -3.62955487 |
| C | 0.84590352  | -0.47145104 | -3.62955487 |
| C | -1.45119226 | -0.02946394 | -2.44357575 |
| C | 1.45119226  | 0.02946394  | -2.44357575 |

|   |             |             |             |
|---|-------------|-------------|-------------|
| C | -0.72852886 | -0.01902720 | -1.16964460 |
| C | 0.72852886  | 0.01902720  | -1.16964460 |
| C | -1.39002132 | -0.06185153 | 0.02867245  |
| C | 1.39002132  | 0.06185153  | 0.02867245  |
| C | -0.70345539 | -0.03778789 | 1.28330516  |
| C | 0.70345539  | 0.03778789  | 1.28330516  |
| C | -1.39224911 | -0.07329118 | 2.51698720  |
| C | 1.39224911  | 0.07329118  | 2.51698720  |
| C | -0.70383698 | -0.03687087 | 3.70728838  |
| C | 0.70383698  | 0.03687087  | 3.70728838  |
| H | -1.36904359 | 0.26740700  | -4.54995740 |
| H | 1.36904359  | -0.26740700 | -4.54995740 |
| H | -0.44666409 | 1.46799755  | -3.60187090 |
| H | 0.44666409  | -1.46799755 | -3.60187090 |
| H | -2.27146220 | -0.71799910 | -2.53271926 |
| H | 2.27146220  | 0.71799910  | -2.53271926 |
| H | -2.46435952 | -0.08355321 | 0.03607169  |
| H | 2.46435952  | 0.08355321  | 0.03607169  |
| H | -2.46486664 | -0.12753490 | 2.51552069  |
| H | 2.46486664  | 0.12753490  | 2.51552069  |
| H | -1.23640645 | -0.06402647 | 4.63856303  |
| H | 1.23640645  | 0.06402647  | 4.63856303  |

CASSCF Energy = -537.374766011

NEVPT2 Energy = -539.637317388

NIMAG = 1

CASSCF H = -537.143752169

CASSCF G (HO) = -537.189821590

CASSCF G (GR) = -537.189449703

## Reaction K

### Ortho,ortho'-bibenzyl (singlet state)

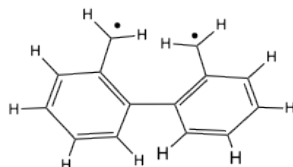

### CASSCF(14,14) Optimized Geometry

|   |             |             |             |
|---|-------------|-------------|-------------|
| C | -3.55806351 | -0.18341400 | 0.35902628  |
| C | 3.55806351  | 0.18341400  | 0.35902628  |
| C | -2.94822001 | 0.57835567  | -0.61670193 |
| C | 2.94822001  | -0.57835567 | -0.61670193 |
| C | -2.77923989 | -0.87287772 | 1.29219320  |
| C | 2.77923989  | 0.87287772  | 1.29219320  |
| C | -1.53246999 | 0.68708980  | -0.70610818 |
| C | 1.53246999  | -0.68708980 | -0.70610818 |
| C | -1.38659728 | -0.78723872 | 1.22402766  |
| C | 1.38659728  | 0.78723872  | 1.22402766  |
| C | -0.95973939 | 1.49096310  | -1.70701894 |
| C | 0.95973939  | -1.49096310 | -1.70701894 |
| C | -0.74659836 | -0.03246148 | 0.24980737  |
| C | 0.74659836  | 0.03246148  | 0.24980737  |
| H | -4.62882996 | -0.24291527 | 0.40141818  |
| H | 4.62882996  | 0.24291527  | 0.40141818  |
| H | -3.54774117 | 1.11390972  | -1.32827148 |
| H | 3.54774117  | -1.11390972 | -1.32827148 |
| H | -3.24339509 | -1.46658981 | 2.05539730  |
| H | 3.24339509  | 1.46658981  | 2.05539730  |
| H | -1.58662665 | 2.01514244  | -2.40046308 |
| H | 1.58662665  | -2.01514244 | -2.40046308 |
| H | -0.79107511 | -1.32266855 | 1.93892982  |

|   |             |             |             |
|---|-------------|-------------|-------------|
| H | 0.79107511  | 1.32266855  | 1.93892982  |
| H | -0.09787586 | -1.61438048 | -1.80084416 |
| H | 0.09787586  | 1.61438048  | -1.80084416 |

CASSCF Energy = -537.399814775  
 NEVPT2 Energy = -539.650908812  
 NIMAG = 0  
 CASSCF H = -537.169827401  
 CASSCF G (HO) = -537.219303390  
 CASSCF G (GR) = -537.218275862

(Z)-6,6'-dimethylene-[1,1'-bi(cyclohexylidene)]-2,2',4,4'-tetraene

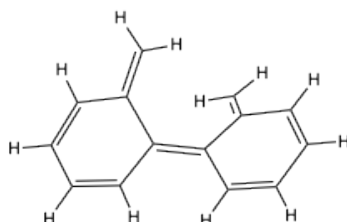

**CASSCF(14,14) Optimized Geometry**

|   |             |             |             |
|---|-------------|-------------|-------------|
| C | -0.68354177 | 0.08999307  | 0.32790710  |
| C | 0.68354177  | -0.08999307 | 0.32790710  |
| C | -1.08568788 | 1.23186874  | -1.85833250 |
| C | 1.08568788  | -1.23186874 | -1.85833250 |
| C | -1.46899211 | -0.02008505 | 1.56177725  |
| C | 1.46899211  | 0.02008505  | 1.56177725  |
| C | -1.50311720 | 0.40861347  | -0.87720905 |
| C | 1.50311720  | -0.40861347 | -0.87720905 |
| C | -2.79716349 | -0.25743476 | 1.53618957  |
| C | 2.79716349  | 0.25743476  | 1.53618957  |
| C | -2.89773536 | -0.05585722 | -0.87434058 |
| C | 2.89773536  | 0.05585722  | -0.87434058 |
| C | -3.52013397 | -0.36177447 | 0.27684666  |
| C | 3.52013397  | 0.36177447  | 0.27684666  |
| H | -0.10747307 | 1.66712260  | -1.86481844 |
| H | 0.10747307  | -1.66712260 | -1.86481844 |
| H | -0.97594398 | -0.00136665 | 2.50948538  |
| H | 0.97594398  | 0.00136665  | 2.50948538  |
| H | -1.73124826 | 1.46779382  | -2.68330251 |
| H | 1.73124826  | -1.46779382 | -2.68330251 |
| H | -3.33128595 | -0.39912909 | 2.45613612  |
| H | 3.33128595  | 0.39912909  | 2.45613612  |
| H | -3.42711186 | -0.06452410 | -1.80839752 |
| H | 3.42711186  | 0.06452410  | -1.80839752 |
| H | -4.55256796 | -0.65366375 | 0.28548567  |
| H | 4.55256796  | 0.65366375  | 0.28548567  |

CASSCF Energy = -537.393123992  
 NEVPT2 Energy = -539.630681040  
 NIMAG = 0  
 CASSCF H = -537.160946857  
 CASSCF G (HO) = -537.210859599  
 CASSCF G (GR) = -537.209696102

First-Order Saddle Point for Disrotatory Ring Opening of 9,10-Dihydrophenanthrene

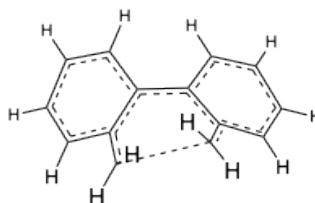

**CASSCF(14,14) Optimized Geometry**

|   |            |             |            |
|---|------------|-------------|------------|
| C | 3.35597777 | -0.61175817 | 0.65642017 |
| C | 2.86181545 | 0.63756049  | 0.45700106 |

|   |             |             |             |
|---|-------------|-------------|-------------|
| C | 1.59353602  | 0.84763741  | -0.18961209 |
| C | 1.28897429  | 2.11897802  | -0.65934688 |
| C | 0.71838576  | -0.26944590 | -0.38728315 |
| C | 1.31912196  | -1.56902087 | -0.23807491 |
| C | 2.58098674  | -1.73619342 | 0.25233084  |
| C | -0.71938390 | -0.17177029 | -0.44315577 |
| C | -1.47970986 | 0.93210799  | 0.09924215  |
| C | -2.71671224 | 0.60006791  | 0.76611698  |
| C | -3.33958364 | -0.59523386 | 0.59499824  |
| C | -2.73320937 | -1.57613146 | -0.24093768 |
| C | -1.47519433 | -1.37236571 | -0.71571767 |
| C | -1.18200493 | 2.30531025  | 0.04266771  |
| H | 1.93117452  | 2.94501996  | -0.41575840 |
| H | 0.71412253  | 2.22282100  | -1.54920328 |
| H | 2.97184825  | -2.72705030 | 0.38242635  |
| H | 0.74215138  | -2.44615436 | -0.43495715 |
| H | -1.02094471 | -2.13934755 | -1.30786180 |
| H | -3.25477147 | -2.48525405 | -0.47082970 |
| H | -4.29591751 | -0.78130984 | 1.04392445  |
| H | -3.19501138 | 1.37574852  | 1.33306837  |
| H | -1.68418729 | 2.94592643  | 0.74616706  |
| H | -0.89627033 | 2.78404331  | -0.85781342 |
| H | 3.44691968  | 1.50196505  | 0.70802635  |
| H | 4.32635117  | -0.75477880 | 1.09133410  |

CASSCF Energy = -537.3691333456

NEVPT2 Energy = -539.6351116598

NIMAG = 1

CASSCF H = -537.137428429

CASSCF G (HO) = -537.189412004

CASSCF G (GR) = -537.186909777

### M06-2X Optimized Geometry

|   |             |             |             |
|---|-------------|-------------|-------------|
| C | 3.25445634  | -0.59532535 | 0.75667457  |
| C | 2.77282399  | 0.65279357  | 0.58529331  |
| C | 1.56885033  | 0.87753705  | -0.17958306 |
| C | 1.34238780  | 2.10144412  | -0.72879854 |
| C | 0.69577223  | -0.24962500 | -0.43455674 |
| C | 1.31881410  | -1.54535135 | -0.35021089 |
| C | 2.53796908  | -1.70965602 | 0.21633800  |
| C | -0.70649263 | -0.14828097 | -0.49151260 |
| C | -1.46520058 | 0.97308066  | 0.06644822  |
| C | -2.63036598 | 0.59974241  | 0.85382870  |
| C | -3.23696738 | -0.59476413 | 0.71217825  |
| C | -2.69458873 | -1.55151440 | -0.20448336 |
| C | -1.48311311 | -1.33837970 | -0.76100967 |
| C | -1.25913792 | 2.31540997  | -0.06888289 |
| H | 1.96930043  | 2.94630292  | -0.47226433 |
| H | 0.73996401  | 2.18759688  | -1.61479673 |
| H | 2.95251438  | -2.70377877 | 0.31414085  |
| H | 0.76593978  | -2.42349974 | -0.64621355 |
| H | -1.06163715 | -2.09067360 | -1.41196940 |
| H | -3.24167708 | -2.45832557 | -0.42312618 |
| H | -4.15131150 | -0.81343620 | 1.24596231  |
| H | -3.07088672 | 1.37045847  | 1.47347535  |
| H | -1.79712334 | 2.98228162  | 0.59528828  |
| H | -0.80428637 | 2.77721825  | -0.91788259 |
| H | 3.32686684  | 1.51972046  | 0.92282547  |
| H | 4.19126337  | -0.75903013 | 1.27124646  |

M06-2X Energy = -540.553843141  
 NIMAG = 1  
 M06-2X H = -540.328613749  
 M06-2X G (HO) = -540.376507202  
 M06-2X G (GR) = -540.375728967

First-Order Saddle Point for Conrotatory  
Ring Opening of 9,10-Dihydrophenanthrene

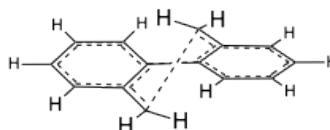

**CASSCF(14,14) Optimized Geometry**

|   |             |             |             |
|---|-------------|-------------|-------------|
| C | -1.43754244 | -0.58917093 | 1.38758469  |
| C | 1.43754244  | 0.58917093  | 1.38758469  |
| C | -2.83429074 | -0.63934189 | 1.40500700  |
| C | 2.83429074  | 0.63934189  | 1.40500700  |
| C | -3.55300403 | -0.11144480 | 0.33860576  |
| C | 3.55300403  | 0.11144480  | 0.33860576  |
| C | -0.74583894 | -0.00696159 | 0.33412993  |
| C | 0.74583894  | 0.00696159  | 0.33412993  |
| C | -2.87959695 | 0.46924475  | -0.72765738 |
| C | 2.87959695  | -0.46924475 | -0.72765738 |
| C | -1.47486389 | 0.55257213  | -0.75333416 |
| C | 1.47486389  | -0.55257213 | -0.75333416 |
| C | -0.81289333 | 1.14748096  | -1.87469304 |
| C | 0.81289333  | -1.14748096 | -1.87469304 |
| H | -0.88474780 | -1.02335596 | 2.19874120  |
| H | 0.88474780  | 1.02335596  | 2.19874120  |
| H | -3.34341621 | -1.09311318 | 2.23315263  |
| H | 3.34341621  | 1.09311318  | 2.23315263  |
| H | -4.62553024 | -0.14994635 | 0.33676341  |
| H | 4.62553024  | 0.14994635  | 0.33676341  |
| H | -3.43749261 | 0.88074595  | -1.54759872 |
| H | 3.43749261  | -0.88074595 | -1.54759872 |
| H | 0.18950772  | 1.50684536  | -1.80904043 |
| H | -0.18950772 | -1.50684536 | -1.80904043 |
| H | -1.39566624 | 1.46918249  | -2.71578264 |
| H | 1.39566624  | -1.46918249 | -2.71578264 |

CASSCF Energy = -537.395733197  
 NEVPT2 Energy = -539.652216138  
 NIMAG = 1  
 CASSCF H = -537.165965479  
 CASSCF G (HO) = -537.212126272  
 CASSCF G (GR) = -537.211809607

**UM06-2X Optimized Geometry**

|   |             |             |             |
|---|-------------|-------------|-------------|
| C | -1.44130932 | -1.41661305 | -0.53485825 |
| C | 1.44130966  | -1.41661292 | 0.53485857  |
| C | -2.83211707 | -1.42271735 | -0.57810074 |
| C | 2.83211745  | -1.42271705 | 0.57810054  |
| C | -3.53695906 | -0.32855192 | -0.09687247 |
| C | 3.53695919  | -0.32855152 | 0.09687211  |
| C | -0.74150411 | -0.34591618 | -0.00255843 |
| C | 0.74150420  | -0.34591608 | 0.00255905  |
| C | -2.85603140 | 0.75133589  | 0.43644890  |
| C | 2.85603130  | 0.75133622  | -0.43644909 |
| C | -1.45478024 | 0.76586192  | 0.51725243  |
| C | 1.45478008  | 0.76586208  | -0.51725216 |
| C | -0.77554927 | 1.88515807  | 1.08804308  |



|   |             |             |             |
|---|-------------|-------------|-------------|
| C | 0.77554872  | 1.88515750  | -1.08804335 |
| H | -0.88524079 | -2.25195097 | -0.94175226 |
| H | 0.88524130  | -2.25195107 | 0.94175229  |
| H | -3.35580364 | -2.27005990 | -0.99838261 |
| H | 3.35580433  | -2.27005973 | 0.99838173  |
| H | -4.61772662 | -0.31745259 | -0.13621740 |
| H | 4.61772675  | -0.31745216 | 0.13621665  |
| H | -3.40596873 | 1.59981104  | 0.82399396  |
| H | 3.40596849  | 1.59981152  | -0.82399400 |
| H | 0.22065482  | 1.79427313  | 1.48633527  |
| H | -0.22065636 | 1.79427246  | -1.48633291 |
| H | -1.33866442 | 2.77230284  | 1.33984502  |
| H | 1.33866349  | 2.77230174  | -1.33984808 |

|                   |   |                |
|-------------------|---|----------------|
| UM06-2X Energy    | = | -540.574545675 |
| NIMAG             | = | 1              |
| <S <sup>2</sup> > | = | 0.8674         |
| UM06-2X H         | = | -540.351549816 |
| UM06-2X G (HO)    | = | -540.398078400 |
| UM06-2X G (GR)    | = | -540.397717985 |

### Data for main text Scheme 7.

#### First-Order Saddle Point for Disrotatory Ring Closure of (Z)-Stilbene

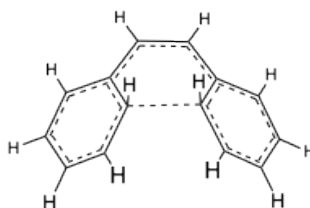

#### CASSCF(14,14) Optimized Geometry

|   |             |             |             |
|---|-------------|-------------|-------------|
| C | -0.82334685 | 2.02198566  | 0.27166065  |
| C | 0.57627853  | 2.11101949  | 0.19115725  |
| C | -1.52466590 | 0.81872571  | 0.31030803  |
| C | -0.95537824 | -0.38057723 | 0.91542478  |
| C | -1.52111858 | -1.66192759 | 0.47997717  |
| C | -2.58986159 | -1.72420339 | -0.34374584 |
| C | -3.24479035 | -0.51780474 | -0.78819327 |
| C | -2.73850139 | 0.69623993  | -0.45324637 |
| C | 1.42135627  | 1.00500818  | 0.18056241  |
| C | 1.05659574  | -0.21726563 | 0.88239727  |
| C | 1.77975070  | -1.43394682 | 0.50214971  |
| C | 2.78111546  | -1.41040028 | -0.40417221 |
| C | 3.21123276  | -0.16422775 | -0.99080872 |
| C | 2.56743913  | 0.99202090  | -0.68800909 |
| H | -1.36832307 | 2.89917494  | -0.02825984 |
| H | 0.96942236  | 3.04240660  | -0.17523869 |
| H | -0.89057619 | -0.31194001 | 1.98142995  |
| H | -1.08961645 | -2.56516844 | 0.86769797  |
| H | -2.99230352 | -2.67546390 | -0.63657435 |
| H | -4.11941713 | -0.58949314 | -1.40526363 |
| H | -3.19756561 | 1.59406926  | -0.82309960 |
| H | 1.01880554  | -0.07901975 | 1.94270150  |
| H | 1.51837086  | -2.35397542 | 0.98985930  |
| H | 3.29988388  | -2.31462135 | -0.66064431 |
| H | 4.03279823  | -0.16330896 | -1.68063282 |
| H | 2.86488994  | 1.91412813  | -1.15141765 |

CASSCF Energy = -537.368779111  
 NEVPT2 Energy = -539.633519533  
 NIMAG = 1  
 CASSCF H = -537.135371831  
 CASSCF G (HO) = -537.182532585  
 CASSCF G (GR) = -537.181441545

### M06-2X Optimized Geometry

|   |             |             |             |
|---|-------------|-------------|-------------|
| C | -0.82736274 | 2.02656523  | 0.36495402  |
| C | 0.54395287  | 2.12412504  | 0.11124403  |
| C | -1.49927484 | 0.80512763  | 0.40507696  |
| C | -0.86223766 | -0.44135736 | 0.83208511  |
| C | -1.33442600 | -1.65198245 | 0.16688327  |
| C | -2.43767108 | -1.64878160 | -0.60899375 |
| C | -3.20469717 | -0.45286438 | -0.78313022 |
| C | -2.75060209 | 0.72194487  | -0.27983517 |
| C | 1.36571384  | 1.00815154  | 0.10212151  |
| C | 0.99461411  | -0.11869473 | 0.94103507  |
| C | 1.75349234  | -1.34889123 | 0.76471439  |
| C | 2.71933410  | -1.44678881 | -0.17087206 |
| C | 3.09116646  | -0.31210401 | -0.96550987 |
| C | 2.45333715  | 0.87512759  | -0.80830485 |
| H | -1.42725764 | 2.90672760  | 0.16235202  |
| H | 0.90235457  | 3.04604336  | -0.33186568 |
| H | -0.85819292 | -0.57637996 | 1.90649460  |
| H | -0.80664213 | -2.57760216 | 0.35824721  |
| H | -2.77766530 | -2.56672612 | -1.07007804 |
| H | -4.11753167 | -0.48166072 | -1.36143996 |
| H | -3.27501708 | 1.64678837  | -0.48812202 |
| H | 0.90571635  | 0.19137166  | 1.97369089  |
| H | 1.52358397  | -2.19220828 | 1.40463991  |
| H | 3.25558563  | -2.37750877 | -0.30075279 |
| H | 3.88561620  | -0.41278471 | -1.69188205 |
| H | 2.72587602  | 1.73201669  | -1.41224669 |

M06-2X Energy = -540.561877693  
 NIMAG = 1  
 M06-2X H = -540.335723467  
 M06-2X G (HO) = -540.382387833  
 M06-2X G (GR) = -540.381661580

### First-Order Saddle Point for Conrotatory Ring Closure of (Z)-Stilbene

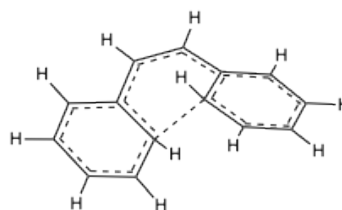

### CASSCF(14,14) Optimized Geometry

|   |             |             |             |
|---|-------------|-------------|-------------|
| C | -0.67545241 | 0.06471224  | 2.14045499  |
| C | 0.67545241  | -0.06471224 | 2.14045499  |
| C | -1.44619370 | 0.17315678  | 0.90885059  |
| C | 1.44619370  | -0.17315678 | 0.90885059  |
| C | -0.71890283 | 0.57687342  | -0.31537666 |
| C | 0.71890283  | -0.57687342 | -0.31537666 |
| C | -1.50566530 | 0.54373109  | -1.54713084 |
| C | 1.50566530  | -0.54373109 | -1.54713084 |
| C | -2.79414916 | 0.08242533  | -1.57524087 |
| C | 2.79414916  | -0.08242533 | -1.57524087 |

|   |             |             |             |
|---|-------------|-------------|-------------|
| C | -3.44714332 | -0.31341347 | -0.38414805 |
| C | 3.44714332  | 0.31341347  | -0.38414805 |
| C | -2.75726247 | -0.25580484 | 0.83652649  |
| C | 2.75726247  | 0.25580484  | 0.83652649  |
| H | -1.20832682 | 0.06974687  | 3.07343028  |
| H | 1.20832682  | -0.06974687 | 3.07343028  |
| H | -0.16533928 | 1.49461627  | -0.19942827 |
| H | 0.16533928  | -1.49461627 | -0.19942827 |
| H | -1.04252815 | 0.88687789  | -2.45273521 |
| H | 1.04252815  | -0.88687789 | -2.45273521 |
| H | -3.33138418 | 0.05566803  | -2.50457217 |
| H | 3.33138418  | -0.05566803 | -2.50457217 |
| H | -4.46274185 | -0.65521204 | -0.41339522 |
| H | 4.46274185  | 0.65521204  | -0.41339522 |
| H | -3.25191092 | -0.57555312 | 1.73542998  |
| H | 3.25191092  | 0.57555312  | 1.73542998  |

CASSCF Energy = -537.363308874  
 NEVPT2 Energy = -539.622002113  
 NIMAG = 1  
 CASSCF H = -537.133293576  
 CASSCF G (HO) = -537.179102874  
 CASSCF G (GR) = -537.178713023

#### UM06-2X Optimized Geometry

|   |             |             |             |
|---|-------------|-------------|-------------|
| C | 0.67231226  | 0.06589010  | -2.14206958 |
| C | -0.67231226 | -0.06589010 | -2.14206958 |
| C | 1.43049002  | 0.18069144  | -0.91055143 |
| C | -1.43049002 | -0.18069144 | -0.91055143 |
| C | 0.69386905  | 0.57374293  | 0.30386984  |
| C | -0.69386905 | -0.57374293 | 0.30386984  |
| C | 1.45629251  | 0.53841954  | 1.53970742  |
| C | -1.45629251 | -0.53841954 | 1.53970742  |
| C | 2.74892759  | 0.10071111  | 1.57639205  |
| C | -2.74892759 | -0.10071111 | 1.57639205  |
| C | 3.42044830  | -0.26878256 | 0.39508134  |
| C | -3.42044830 | 0.26878256  | 0.39508134  |
| C | 2.74732542  | -0.21435039 | -0.82751840 |
| C | -2.74732542 | 0.21435039  | -0.82751840 |
| H | 1.21735394  | 0.07408555  | -3.07835293 |
| H | -1.21735394 | -0.07408555 | -3.07835293 |
| H | 0.10042831  | 1.48085678  | 0.18469726  |
| H | -0.10042831 | -1.48085678 | 0.18469726  |
| H | 0.96883821  | 0.86938065  | 2.44784641  |
| H | -0.96883821 | -0.86938065 | 2.44784641  |
| H | 3.27802110  | 0.07100245  | 2.51986361  |
| H | -3.27802110 | -0.07100245 | 2.51986361  |
| H | 4.45037651  | -0.59234232 | 0.43392485  |
| H | -4.45037651 | 0.59234232  | 0.43392485  |
| H | 3.25650668  | -0.51990104 | -1.73400712 |
| H | -3.25650668 | 0.51990104  | -1.73400712 |

UM06-2X Energy = -540.549415988  
 NIMAG = 1  
 <S<sup>2</sup>> = 0.9932  
 UM06-2X H = -540.326555463  
 UM06-2X G (HO) = -540.372718622  
 UM06-2X G (GR) = -540.372260763

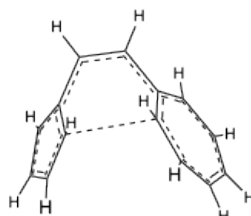

**First-Order Saddle Point for Disrotatory  
Ring Closure of Compound 25**

**CASSCF(14,14) Optimized Geometry**

|   |             |             |             |
|---|-------------|-------------|-------------|
| C | 1.58568290  | 1.87047659  | -0.39771564 |
| C | 2.02638653  | 0.50871341  | -0.02373605 |
| C | 1.86502853  | -0.67305787 | -0.87111975 |
| C | 2.20866921  | -1.82271757 | -0.08609469 |
| C | 2.55898121  | -1.38799705 | 1.15959726  |
| C | 2.43507483  | 0.07794469  | 1.19648515  |
| C | 0.28715002  | 2.16240786  | -0.54965837 |
| C | -0.77223161 | 1.12943624  | -0.34587703 |
| C | -0.69814643 | -0.00997026 | -1.22546531 |
| C | -1.50444386 | -1.19116749 | -1.19118155 |
| C | -2.49644849 | -1.54793157 | -0.33232586 |
| C | -3.05363843 | -0.77729096 | 0.76667361  |
| C | -2.69687578 | 0.45421196  | 1.18628894  |
| C | -1.64164838 | 1.32242451  | 0.68587826  |
| H | 1.83665147  | -0.65311386 | -1.93893625 |
| H | 2.58810356  | 0.68521486  | 2.06535994  |
| H | 2.87612632  | -1.99696161 | 1.98142277  |
| H | 2.22428325  | -2.83285024 | -0.43834974 |
| H | 2.32185939  | 2.64756463  | -0.49779914 |
| H | -1.52595779 | 2.23964499  | 1.23408567  |
| H | -3.24667499 | 0.85607247  | 2.01764022  |
| H | -3.86056611 | -1.25224604 | 1.29397784  |
| H | -2.95358750 | -2.50548412 | -0.49860774 |
| H | -1.27852461 | -1.90183260 | -1.96621312 |
| H | -0.19489929 | 0.16893105  | -2.15114774 |
| H | -0.01964957 | 3.17002962  | -0.76505221 |

CASSCF Energy = -537.321258124

NEVPT2 Energy = -539.563060476

NIMAG = 1

CASSCF H = -537.091435874

CASSCF G (HO) = -537.140236176

CASSCF G (GR) = -537.139151123

**M06-2X Optimized Geometry**

|   |             |             |             |
|---|-------------|-------------|-------------|
| C | 1.37750008  | 1.88801888  | -0.23987571 |
| C | 2.01046152  | 0.62524447  | -0.10867615 |
| C | 1.69925412  | -0.63607269 | -0.79073517 |
| C | 2.34244459  | -1.65862455 | -0.07084341 |
| C | 3.01684333  | -1.08179829 | 1.00254386  |
| C | 2.85193793  | 0.31535337  | 0.96077120  |
| C | 0.04240224  | 2.12809138  | -0.41538920 |
| C | -0.92841470 | 1.07903698  | -0.37769138 |
| C | -0.59540623 | -0.17931092 | -1.02845103 |
| C | -1.18693412 | -1.43070104 | -0.79464425 |
| C | -2.22724424 | -1.77939310 | 0.03075454  |
| C | -3.10459100 | -0.92810107 | 0.72155635  |
| C | -3.09059031 | 0.44373028  | 0.76932200  |
| C | -2.11783464 | 1.32844457  | 0.27651055  |
| H | 1.58187113  | -0.70698463 | -1.85892698 |
| H | 3.18472121  | 1.01742563  | 1.71055581  |
| H | 3.58530214  | -1.61708820 | 1.74911726  |
| H | 2.39660079  | -2.69411613 | -0.36935813 |
| H | 1.97512484  | 2.74821712  | 0.04815732  |

|   |             |             |             |
|---|-------------|-------------|-------------|
| H | -2.28726153 | 2.37381835  | 0.51596765  |
| H | -3.90508779 | 0.91111709  | 1.30863093  |
| H | -3.91976884 | -1.41550263 | 1.24268767  |
| H | -2.46218407 | -2.83540596 | 0.07643778  |
| H | -0.74292707 | -2.24373671 | -1.35856330 |
| H | -0.16100781 | -0.03674526 | -2.00227462 |
| H | -0.31495657 | 3.14259608  | -0.29029968 |

M06-2X Energy = -540.500152082  
 NIMAG = 1  
 M06-2X H = -540.275327815  
 M06-2X G (HO) = -540.324135772  
 M06-2X G (GR) = -540.322904889

### First-Order Saddle Point for Conrotatory Ring Closure of Compound 25

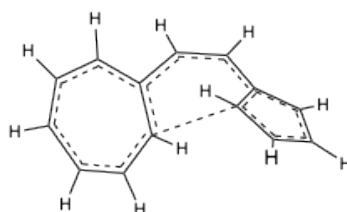

#### CASSCF(14,14) Optimized Geometry

|   |             |             |             |
|---|-------------|-------------|-------------|
| C | -2.66276644 | -1.63946638 | -0.47811676 |
| C | -3.51124976 | -0.71510706 | 0.25761175  |
| C | -3.25096653 | 0.56711897  | 0.58968412  |
| C | -1.41770993 | -1.41525111 | -0.98108150 |
| C | -2.06196783 | 1.36103394  | 0.33041112  |
| C | -0.59178052 | -0.25329411 | -0.90554483 |
| C | -0.89917831 | 1.01122847  | -0.30652769 |
| C | 0.16564684  | 2.04559877  | -0.38279371 |
| C | 1.48132922  | 1.83335128  | -0.20819062 |
| C | 2.10815789  | 0.56032791  | 0.14952190  |
| C | 3.34133698  | 0.12466974  | -0.22294716 |
| C | 1.48092927  | -0.52364233 | 0.91927759  |
| C | 3.52330973  | -1.24269495 | 0.27453880  |
| C | 2.38768770  | -1.61286566 | 0.95738606  |
| H | -3.08592413 | -2.61034510 | -0.65612067 |
| H | -4.46480177 | -1.10873053 | 0.55815743  |
| H | -4.02083538 | 1.08595207  | 1.13135444  |
| H | -0.97462235 | -2.23561237 | -1.51668765 |
| H | -2.10543321 | 2.36317256  | 0.71538369  |
| H | 0.28002747  | -0.27567241 | -1.52375902 |
| H | -0.16291895 | 3.04896858  | -0.58321591 |
| H | 4.40345098  | -1.83584330 | 0.13332285  |
| H | 2.22501709  | -2.54025957 | 1.46525215  |
| H | 2.14651873  | 2.66670611  | -0.34587626 |
| H | 4.05392029  | 0.66514656  | -0.81242259 |
| H | 0.60090508  | -0.42616171 | 1.51523255  |

CASSCF Energy = -537.331422177  
 NEVPT2 Energy = -539.575831840  
 NIMAG = 1  
 CASSCF H = -537.102203067  
 CASSCF G (HO) = -537.150660852  
 CASSCF G (GR) = -537.149887798

#### UM06-2X Optimized Geometry

|   |             |             |             |
|---|-------------|-------------|-------------|
| C | -2.33161817 | -1.70062082 | -0.35822974 |
| C | -3.28087178 | -0.85823661 | 0.22598384  |
| C | -3.15975581 | 0.50227065  | 0.42649313  |
| C | -1.06395655 | -1.40314488 | -0.80562386 |

|   |             |             |             |
|---|-------------|-------------|-------------|
| C | -2.07437407 | 1.34938335  | 0.21022915  |
| C | -0.31746375 | -0.21561188 | -0.68202275 |
| C | -0.77603458 | 1.07063850  | -0.21663348 |
| C | 0.18874527  | 2.13991617  | -0.24928842 |
| C | 1.52806346  | 1.91285760  | -0.12265480 |
| C | 2.04153731  | 0.64662772  | 0.26235391  |
| C | 3.13102978  | -0.00891390 | -0.33946211 |
| C | 1.27165140  | -0.35153723 | 0.96170099  |
| C | 3.03681595  | -1.37633330 | -0.04901149 |
| C | 1.92164391  | -1.58027618 | 0.77719955  |
| H | -2.65467805 | -2.72213158 | -0.52614938 |
| H | -4.22733037 | -1.30771696 | 0.49542608  |
| H | -4.03850318 | 0.99208716  | 0.83110936  |
| H | -0.53913371 | -2.20395264 | -1.31111847 |
| H | -2.24500684 | 2.38674080  | 0.47453939  |
| H | 0.56864221  | -0.18107747 | -1.30174022 |
| H | -0.18713989 | 3.14855844  | -0.36601364 |
| H | 3.71945654  | -2.13963425 | -0.38914107 |
| H | 1.64029174  | -2.51622057 | 1.23553413  |
| H | 2.22063919  | 2.72048875  | -0.33839914 |
| H | 3.84975247  | 0.45555785  | -0.99838568 |
| H | 0.51881454  | -0.14509524 | 1.70575476  |

|                   |   |                |
|-------------------|---|----------------|
| UM06-2X Energy    | = | -540.519381764 |
| NIMAG             | = | 1              |
| <S <sup>2</sup> > | = | 0.0000         |
| UM06-2X H         | = | -540.295007903 |
| UM06-2X G (HO)    | = | -540.342744448 |
| UM06-2X G (GR)    | = | -540.342157169 |

First-Order Saddle Point for Disrotatory  
Ring Closure of Compound **26**

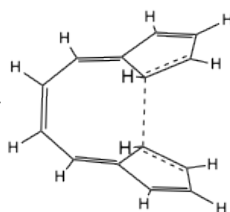

CASSCF(14,14) Optimized Geometry

|   |             |             |             |
|---|-------------|-------------|-------------|
| C | 2.60736199  | 0.40735534  | -0.67028236 |
| C | 2.60736199  | 0.40735534  | 0.67028236  |
| C | 1.67823763  | -0.39365682 | -1.49569213 |
| C | 1.67823763  | -0.39365682 | 1.49569213  |
| C | 0.34855409  | -0.21120898 | -1.58141375 |
| C | 0.34855409  | -0.21120898 | 1.58141375  |
| C | -0.45647217 | 0.92594484  | -1.01457787 |
| C | -0.45647217 | 0.92594484  | 1.01457787  |
| C | -0.58367406 | -1.05576768 | -2.32146859 |
| C | -0.58367406 | -1.05576768 | 2.32146859  |
| C | -1.75961940 | 0.76624343  | -1.60774767 |
| C | -1.75961940 | 0.76624343  | 1.60774767  |
| C | -1.82409446 | -0.45884731 | -2.31055498 |
| C | -1.82409446 | -0.45884731 | 2.31055498  |
| H | 3.37933727  | 0.95201281  | -1.18684661 |
| H | 3.37933727  | 0.95201281  | 1.18684661  |
| H | 2.11691638  | -1.21047189 | -2.04412985 |
| H | 2.11691638  | -1.21047189 | 2.04412985  |
| H | -0.00499402 | 1.89793823  | -1.05942273 |
| H | -0.00499402 | 1.89793823  | 1.05942273  |
| H | -0.33002917 | -1.99561885 | -2.76645756 |
| H | -0.33002917 | -1.99561885 | 2.76645756  |
| H | -2.57897095 | 1.44219587  | -1.47460735 |

|   |             |             |             |
|---|-------------|-------------|-------------|
| H | -2.57897095 | 1.44219587  | 1.47460735  |
| H | -2.70482378 | -0.84866741 | -2.78067112 |
| H | -2.70482378 | -0.84866741 | 2.78067112  |

|               |   |                |
|---------------|---|----------------|
| CASSCF Energy | = | -537.294613652 |
| NEVPT2 Energy | = | -539.544518710 |
| NIMAG         | = | 1              |
| CASSCF H      | = | -537.066299276 |
| CASSCF G (HO) | = | -537.114846093 |
| CASSCF G (GR) | = | -537.113859589 |

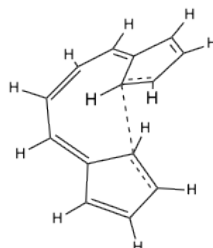

### First-Order Saddle Point for Conrotatory Ring Closure of Compound 26

#### CASSCF(14,14) Optimized Geometry

|   |             |             |             |
|---|-------------|-------------|-------------|
| C | -2.67189789 | 0.83524096  | -1.76668062 |
| C | 2.67189789  | -0.83524096 | -1.76668062 |
| C | -1.43289530 | 1.43309951  | -1.70315292 |
| C | 1.43289530  | -1.43309951 | -1.70315292 |
| C | -2.90770960 | 0.12743510  | -0.50812300 |
| C | 2.90770960  | -0.12743510 | -0.50812300 |
| C | -0.86727172 | 1.13387096  | -0.44166555 |
| C | 0.86727172  | -1.13387096 | -0.44166555 |
| C | -1.82629299 | 0.29895100  | 0.30340863  |
| C | 1.82629299  | -0.29895100 | 0.30340863  |
| C | -1.69100440 | -0.30296740 | 1.62082467  |
| C | 1.69100440  | 0.30296740  | 1.62082467  |
| C | -0.66630614 | -0.31936646 | 2.49593291  |
| C | 0.66630614  | 0.31936646  | 2.49593291  |
| H | -3.35753870 | 0.87516922  | -2.58794417 |
| H | 3.35753870  | -0.87516922 | -2.58794417 |
| H | -0.97676986 | 2.03597116  | -2.45968285 |
| H | 0.97676986  | -2.03597116 | -2.45968285 |
| H | -3.78409219 | -0.44341981 | -0.27743205 |
| H | 3.78409219  | 0.44341981  | -0.27743205 |
| H | -0.01269188 | -1.57745612 | -0.03771006 |
| H | 0.01269188  | 1.57745612  | -0.03771006 |
| H | -2.57021141 | -0.83880436 | 1.93332884  |
| H | 2.57021141  | 0.83880436  | 1.93332884  |
| H | -0.87171328 | -0.82788116 | 3.42296157  |
| H | 0.87171328  | 0.82788116  | 3.42296157  |

|               |   |                |
|---------------|---|----------------|
| CASSCF Energy | = | -537.313997063 |
| NEVPT2 Energy | = | -539.559202400 |
| NIMAG         | = | 1              |
| CASSCF H      | = | -537.086080511 |
| CASSCF G (HO) | = | -537.135088749 |
| CASSCF G (GR) | = | -537.134457028 |

#### Data for main text Figure 7

All data for Figure 7 are listed under Reaction G above.

#### Data for main text Figure 8

7-Methoxy-7-vinylbicyclo[4.2.0]octa-1,3,5-triene

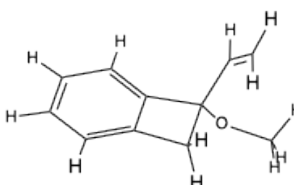

### M06-2X Optimized Geometry

|   |             |             |             |
|---|-------------|-------------|-------------|
| C | -0.96312589 | -0.09265179 | 0.01340439  |
| C | 0.52021958  | -0.29800201 | 0.27040121  |
| C | 0.89812327  | 0.55032041  | -0.75228202 |
| C | 2.22458691  | 0.82641696  | -1.01899960 |
| C | 3.15562304  | 0.18553433  | -0.20150808 |
| C | 2.76828914  | -0.67979542 | 0.82155278  |
| C | 1.42507455  | -0.94428610 | 1.08685803  |
| C | -0.52517561 | 0.83001456  | -1.19282531 |
| C | -2.90285925 | -1.13990916 | -0.83923610 |
| C | -1.69325434 | 0.54344676  | 1.16224127  |
| C | -2.23769816 | 1.74841295  | 1.19592373  |
| O | -1.58287722 | -1.30063520 | -0.36903695 |
| H | 1.13180072  | -1.61670091 | 1.88155263  |
| H | 3.53369174  | -1.15406080 | 1.42125718  |
| H | 4.21127452  | 0.35848661  | -0.36460574 |
| H | 2.54453632  | 1.48900670  | -1.81198922 |
| H | -0.78925167 | 0.38794294  | -2.15300374 |
| H | -0.84531771 | 1.86925266  | -1.16707254 |
| H | -3.22300581 | -2.10679490 | -1.21945772 |
| H | -3.58093104 | -0.81985054 | -0.04433871 |
| H | -2.94904379 | -0.40468312 | -1.64978501 |
| H | -2.20665898 | 2.41952438  | 0.34799536  |
| H | -2.73565511 | 2.10933628  | 2.08565760  |
| H | -1.75891896 | -0.10094707 | 2.03513839  |

M06-2X Energy = -501.501434184

NIMAG = 0

M06-2X H = -501.288634902

M06-2X G (HO) = -501.337605230

M06-2X G (GR) = -501.336510252

### First-Order Saddle Point for Outward Conrotatory Ring Opening of 7-Methoxy-7-vinylbicyclo[4.2.0]octa-1,3,5-triene

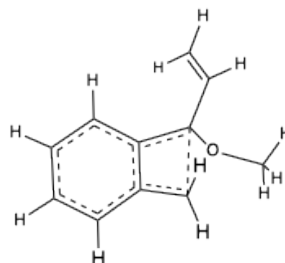

### M06-2X Optimized Geometry

|   |             |             |             |
|---|-------------|-------------|-------------|
| C | -2.63776708 | -1.54494031 | -0.67235093 |
| C | -1.09497125 | 0.17898380  | -0.20085293 |
| C | -2.00603155 | 1.25518398  | 0.14131069  |
| C | -1.67233002 | 2.22156052  | 1.00069776  |
| C | 0.33993429  | 0.31324752  | -0.09689665 |
| C | 1.20945454  | 1.27411719  | -0.62228553 |
| C | 2.55079816  | 0.96000191  | -0.64959549 |
| C | 3.01380166  | -0.28118566 | -0.15909292 |
| C | 2.17328384  | -1.18251653 | 0.44904714  |
| C | 0.82022773  | -0.81302795 | 0.59465469  |
| C | -0.21945106 | -1.32102612 | 1.40981198  |
| O | -1.53812638 | -0.76191971 | -1.07794703 |
| H | -2.98626029 | 1.25092914  | -0.32275920 |
| H | -0.70857080 | 2.21520638  | 1.49526083  |
| H | -2.34811559 | 3.03424194  | 1.22598237  |
| H | -0.77260868 | -0.62192311 | 2.01695936  |
| H | -0.24008096 | -2.35456856 | 1.74209580  |
| H | 2.54964451  | -2.10928807 | 0.86254732  |
| H | 4.06789491  | -0.51109170 | -0.24562097 |
| H | 3.25640220  | 1.64339791  | -1.10148975 |
| H | 0.83422968  | 2.18394641  | -1.07295872 |



|   |             |             |             |
|---|-------------|-------------|-------------|
| H | -2.94680744 | -2.13109870 | -1.53370007 |
| H | -2.31309362 | -2.19965981 | 0.14438437  |
| H | -3.47406268 | -0.93385454 | -0.32498523 |

|               |   |                |
|---------------|---|----------------|
| M06-2X Energy | = | -501.436271872 |
| NIMAG         | = | 1              |
| M06-2X H      | = | -501.226589931 |
| M06-2X G (HO) | = | -501.274368389 |
| M06-2X G (GR) | = | -501.274004674 |

First-Order Saddle Point for Inward  
Conrotatory Ring Opening of  
7-Methoxy-7-vinylbicyclo[4.2.0]octa-1,3,5-triene

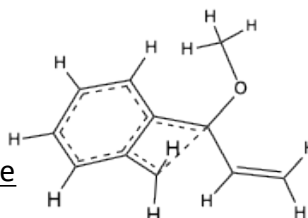

M06-2X Optimized Geometry

|   |             |             |             |
|---|-------------|-------------|-------------|
| C | 1.58301069  | 2.10063877  | 0.90869698  |
| C | 1.08745380  | -0.01400471 | -0.04454371 |
| C | -0.33062682 | 0.25117710  | -0.05339771 |
| C | -0.93772845 | -0.81719756 | 0.62717269  |
| C | -2.29798861 | -1.09972687 | 0.38249099  |
| C | -3.02681187 | -0.16931691 | -0.31663303 |
| C | -2.44102562 | 1.01922772  | -0.80958574 |
| C | -1.09021390 | 1.24649921  | -0.68610284 |
| C | 0.03536276  | -1.40661893 | 1.46641529  |
| C | 1.64068932  | -1.16209130 | -0.75953705 |
| C | 2.92306167  | -1.28217000 | -1.09779764 |
| O | 1.99254648  | 0.94228882  | 0.19567856  |
| H | -0.63078344 | 2.11344795  | -1.14300327 |
| H | -3.06029086 | 1.73172871  | -1.33663795 |
| H | -4.08464332 | -0.33122683 | -0.47710953 |
| H | -2.76761412 | -1.98259111 | 0.79635607  |
| H | 0.02123843  | -2.45774146 | 1.73468586  |
| H | 0.58621088  | -0.76404985 | 2.13590684  |
| H | 0.90999328  | -1.90205515 | -1.05434529 |
| H | 3.65586596  | -0.54422164 | -0.80572770 |
| H | 3.25904757  | -2.13266437 | -1.67244295 |
| H | 2.47545443  | 2.50259984  | 1.37991587  |
| H | 0.83899905  | 1.84623641  | 1.66398185  |
| H | 1.16518101  | 2.84448006  | 0.23105250  |

|               |   |                |
|---------------|---|----------------|
| M06-2X Energy | = | -501.452880175 |
| NIMAG         | = | 1              |
| M06-2X H      | = | -501.242588917 |
| M06-2X G (HO) | = | -501.290211608 |
| M06-2X G (GR) | = | -501.289850516 |

(E)-5-(2-methoxyallylidene)-6-methylenecyclohexa-1,3-diene

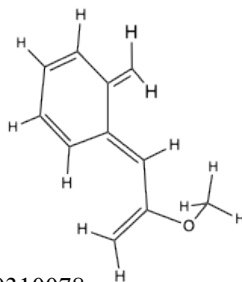

M06-2X Optimized Geometry

|   |            |             |             |
|---|------------|-------------|-------------|
| C | 1.92888805 | -1.78489158 | 0.30310078  |
| C | 3.02484948 | -0.87213305 | 0.56952433  |
| C | 2.87527021 | 0.44438265  | 0.37576339  |
| C | 1.63253270 | 0.99573815  | -0.15457134 |
| C | 0.45513001 | 0.09082210  | -0.21033996 |

|   |             |             |             |
|---|-------------|-------------|-------------|
| C | 0.72260998  | -1.33649302 | -0.07711866 |
| C | -0.79480324 | 0.59530289  | -0.28792858 |
| C | 1.61366141  | 2.24131588  | -0.65130130 |
| C | -2.04409724 | -0.14024183 | -0.50839250 |
| C | -2.22404145 | -1.08317345 | -1.43021845 |
| C | -2.91522589 | 0.40855423  | 1.61060938  |
| O | -3.12626161 | 0.29338779  | 0.21391463  |
| H | 2.08583265  | -2.84421908 | 0.45604313  |
| H | 3.96648653  | -1.27130229 | 0.92133942  |
| H | 3.69368466  | 1.13183299  | 0.54740025  |
| H | -0.09997514 | -2.02346396 | -0.20541879 |
| H | -0.92616996 | 1.66571130  | -0.16360355 |
| H | 2.48701375  | 2.87516444  | -0.57425024 |
| H | 0.75363452  | 2.64228933  | -1.16844210 |
| H | -3.19248831 | -1.54678709 | -1.54905181 |
| H | -1.41953261 | -1.35599349 | -2.09559893 |
| H | -2.13442644 | 1.13496355  | 1.84443383  |
| H | -2.64055499 | -0.55796985 | 2.04078291  |
| H | -3.85646617 | 0.74222998  | 2.03892050  |

|               |   |                |
|---------------|---|----------------|
| M06-2X Energy | = | -501.484336602 |
| NIMAG         | = | 0              |
| M06-2X H      | = | -501.272074636 |
| M06-2X G (HO) | = | -501.322927879 |
| M06-2X G (GR) | = | -501.321349808 |

(Z)-5-(2-methoxyallylidene)-6-methylenecyclohexa-1,3-diene  
Conformation A

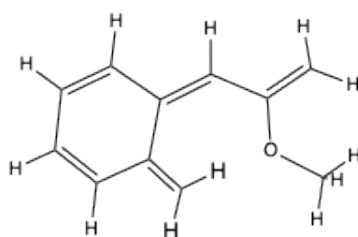

M06-2X Optimized Geometry

|   |             |             |             |
|---|-------------|-------------|-------------|
| C | 3.02925428  | 0.90645891  | -0.30343498 |
| C | 3.18590811  | -0.53404851 | -0.38833348 |
| C | 2.16810453  | -1.34422556 | -0.07018986 |
| C | 0.88792394  | -0.80969010 | 0.38858818  |
| C | 0.64179191  | 0.63244836  | 0.15195525  |
| C | 1.83472612  | 1.45263214  | -0.03197164 |
| C | -0.56080432 | 1.24482259  | 0.09263061  |
| C | 0.06419956  | -1.57654254 | 1.11330300  |
| C | -1.90864632 | 0.67637557  | 0.00366171  |
| C | -2.97407621 | 1.34568267  | 0.46292219  |
| C | -3.21219042 | -1.16751639 | -0.67140859 |
| O | -1.96103252 | -0.52395696 | -0.61710741 |
| H | 3.88572253  | 1.53935896  | -0.49261059 |
| H | 4.14237963  | -0.94231124 | -0.68499539 |
| H | 2.28613633  | -2.42035260 | -0.08068226 |
| H | 1.70889292  | 2.52808291  | -0.02064821 |
| H | -0.55010122 | 2.32841876  | 0.06668129  |
| H | 0.29765267  | -2.61884201 | 1.28900509  |
| H | -0.83485083 | -1.18185714 | 1.56444632  |
| H | -3.98150666 | 0.96693395  | 0.40541012  |
| H | -2.82434260 | 2.31150760  | 0.91944746  |
| H | -3.92899066 | -0.58463310 | -1.25525119 |
| H | -3.61467287 | -1.32427682 | 0.33323346  |
| H | -3.04353783 | -2.12622115 | -1.15309595 |

|               |   |                |
|---------------|---|----------------|
| M06-2X Energy | = | -501.486819918 |
|---------------|---|----------------|

NIMAG = 0  
M06-2X H = -501.274309179  
M06-2X G (HO) = -501.323744268  
M06-2X G (GR) = -501.322410257

(Z)-5-(2-methoxyallylidene)-6-methylenecyclohexa-1,3-diene  
Conformation B

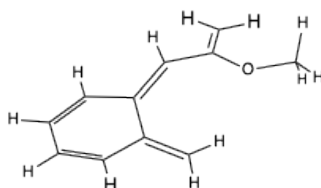

**M06-2X Optimized Geometry**

|   |             |             |             |
|---|-------------|-------------|-------------|
| C | 3.09495001  | -0.93412091 | -0.15094532 |
| C | 3.31532303  | 0.45432930  | 0.21893280  |
| C | 2.29257042  | 1.31724347  | 0.25932252  |
| C | 0.93372747  | 0.90612539  | -0.08843267 |
| C | 0.67976663  | -0.55469166 | -0.16327461 |
| C | 1.85632735  | -1.40401630 | -0.34639038 |
| C | -0.52130632 | -1.13813649 | -0.01467388 |
| C | 0.01852738  | 1.82842019  | -0.41326658 |
| C | -1.79248693 | -0.48041757 | 0.36444808  |
| C | -2.10784736 | -0.18807759 | 1.62348702  |
| C | -3.84129881 | 0.32456301  | -0.48072990 |
| O | -2.58172591 | -0.26440640 | -0.72228496 |
| H | 3.94777880  | -1.59310118 | -0.24225638 |
| H | 4.32176930  | 0.78580657  | 0.43511169  |
| H | 2.45451475  | 2.36342189  | 0.48629780  |
| H | 1.68744062  | -2.44814840 | -0.57778886 |
| H | -0.58012935 | -2.21370947 | -0.15019494 |
| H | 0.25792709  | 2.88123254  | -0.33469116 |
| H | -0.95682694 | 1.56333790  | -0.79378560 |
| H | -3.03828046 | 0.27776741  | 1.90756269  |
| H | -1.39456387 | -0.41127298 | 2.40092250  |
| H | -3.72630573 | 1.31135858  | -0.02427337 |
| H | -4.44557967 | -0.30451154 | 0.17706865  |
| H | -4.32691463 | 0.42171585  | -1.44718443 |

M06-2X Energy = -501.484560456  
NIMAG = 0  
M06-2X H = -501.272258115  
M06-2X G (HO) = -501.321677474  
M06-2X G (GR) = -501.320479862

First-Order Saddle Point for (E)-(Z)  
Interconversion of 5-(2-methoxyallylidene)-6-methylenecyclohexa-1,3-diene

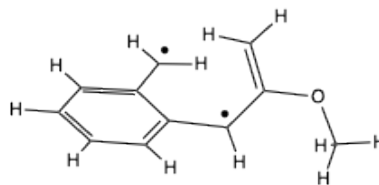

**UM06-2X Optimized Geometry**

|   |             |             |             |
|---|-------------|-------------|-------------|
| C | 3.65737469  | -0.26949553 | -0.99716163 |
| C | 1.82040909  | -0.08355784 | 0.50138407  |
| C | 0.92011180  | -0.20970546 | -0.53122633 |
| C | -0.54325258 | -0.23791493 | -0.30765127 |
| C | -1.29563575 | 0.97095224  | -0.23547509 |
| C | -2.69846671 | 0.87084930  | -0.07211054 |
| C | -3.32586327 | -0.35001112 | 0.03201269  |
| C | -2.57732312 | -1.52349270 | -0.02042779 |
| C | -1.19821195 | -1.45299679 | -0.18956600 |

|   |             |             |             |
|---|-------------|-------------|-------------|
| C | -0.67776484 | 2.23144379  | -0.29688480 |
| C | 1.43536631  | 0.07955491  | 1.83002461  |
| O | 3.17351595  | -0.08569871 | 0.31164571  |
| H | -0.61357648 | -2.36307965 | -0.23293380 |
| H | -3.06248734 | -2.48572965 | 0.06698396  |
| H | -4.39915492 | -0.39642360 | 0.15807698  |
| H | -3.27653608 | 1.78527235  | -0.02588081 |
| H | -1.27373765 | 3.13067726  | -0.24721120 |
| H | 0.39225549  | 2.32943704  | -0.38617717 |
| H | 1.26453818  | -0.28311691 | -1.55339689 |
| H | 2.18831163  | 0.18527443  | 2.59485652  |
| H | 0.39152520  | 0.10323421  | 2.09472661  |
| H | 3.34723136  | 0.54567083  | -1.65647216 |
| H | 3.31591725  | -1.21909327 | -1.41748832 |
| H | 4.74107725  | -0.27714523 | -0.92289030 |

UM06-2X Energy = -501.453649287  
 NIMAG = 1  
 $\langle S^2 \rangle$  = 1.0503  
 UM06-2X H = -501.245970945  
 UM06-2X G (HO) = -501.293798195  
 UM06-2X G (GR) = -501.293161057

**First-Order Saddle Point for (A)-(B) Conformational Interconversion of (Z)-5-(2-methoxyallylidene)-6-methylenecyclohexa-1,3-diene**

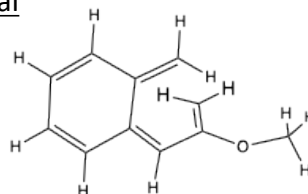

**M06-2X Optimized Geometry**

|   |             |             |             |
|---|-------------|-------------|-------------|
| C | 3.93895211  | 0.19593048  | -0.51745341 |
| C | 1.79385743  | -0.39612920 | 0.41450095  |
| C | 0.54270815  | -1.09204057 | 0.03333893  |
| C | -0.67207013 | -0.54776515 | -0.14563648 |
| C | -0.96589234 | 0.90733829  | -0.13006757 |
| C | -2.33469568 | 1.29493584  | 0.20535466  |
| C | -3.33359510 | 0.40340435  | 0.19119058  |
| C | -3.07565165 | -0.98922386 | -0.13752860 |
| C | -1.82423814 | -1.43293162 | -0.31278262 |
| C | -0.07623739 | 1.83501922  | -0.50409708 |
| C | 2.02653310  | 0.00624141  | 1.66024996  |
| O | 2.61876730  | -0.29668374 | -0.66408607 |
| H | -1.62758102 | -2.47883402 | -0.51217185 |
| H | -3.91098124 | -1.67203942 | -0.21408163 |
| H | -4.34906141 | 0.71356470  | 0.39685023  |
| H | -2.52447029 | 2.34304337  | 0.39954510  |
| H | -0.33842981 | 2.88493538  | -0.47387523 |
| H | 0.90487098  | 1.57307117  | -0.87273605 |
| H | 0.63679220  | -2.16782632 | -0.08165874 |
| H | 2.92651620  | 0.50384254  | 1.98240385  |
| H | 1.25518478  | -0.15477702 | 2.39652284  |
| H | 4.15909769  | 0.51782078  | 0.49531535  |
| H | 4.06482996  | 1.04017999  | -1.19384017 |
| H | 4.63459771  | -0.59452904 | -0.79704069 |

M06-2X Energy = -501.477987916  
 NIMAG = 1  
 M06-2X H = -501.266955756  
 M06-2X G (HO) = -501.316837470  
 M06-2X G (GR) = -501.315157986

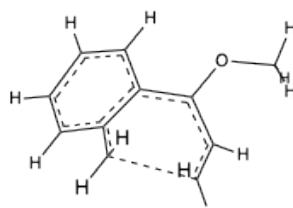

First-Order Saddle Point for Disrotatory Ring  
Closure of (Z)-5-(2-methoxyallylidene)-6-  
methylenecyclohexa-1,3-diene

**M06-2X Optimized Geometry**

|   |             |             |             |
|---|-------------|-------------|-------------|
| C | 1.56371543  | 2.31453887  | 0.24357610  |
| C | 1.76936989  | 0.98245849  | 0.47033093  |
| C | 1.13430740  | -0.13563460 | -0.11985337 |
| C | -0.25152208 | -0.23554946 | -0.32838636 |
| C | -1.11966258 | 0.90103537  | -0.18728148 |
| C | -2.42429921 | 0.66876251  | 0.35752077  |
| C | -2.93196392 | -0.58575654 | 0.44369663  |
| C | -2.14871301 | -1.70261693 | 0.03275275  |
| C | -0.85223450 | -1.53823710 | -0.33357076 |
| C | -0.73733848 | 2.16425557  | -0.58555277 |
| C | 3.18358878  | -1.34387685 | 0.09397682  |
| O | 1.79063873  | -1.32874569 | -0.13478331 |
| H | 1.88817026  | 3.01471359  | 1.00527558  |
| H | -0.14282272 | 2.26183367  | -1.47440746 |
| H | -0.23674512 | -2.39212622 | -0.57131906 |
| H | -2.58295282 | -2.69298435 | 0.04967038  |
| H | -3.94545355 | -0.74051075 | 0.78823439  |
| H | -3.03293762 | 1.53130527  | 0.59922139  |
| H | -1.35083090 | 3.01838709  | -0.32561009 |
| H | 3.54450341  | -2.29725724 | -0.28286166 |
| H | 3.41486355  | -1.27481959 | 1.15884725  |
| H | 3.67705231  | -0.52481600 | -0.43257711 |
| H | 2.38888294  | 0.71862759  | 1.32369912  |
| H | 1.47430750  | 2.73202056  | -0.73744956 |

M06-2X Energy = -501.463291879  
NIMAG = 1  
M06-2X H = -501.251944252  
M06-2X G (HO) = -501.299051054  
M06-2X G (GR) = -501.298445442

First-Order Saddle Point for Conrotatory Ring  
Closure of (Z)-5-(2-methoxyallylidene)-6-  
methylenecyclohexa-1,3-diene

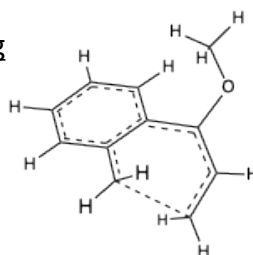

**UM06-2X Optimized Geometry**

|   |             |             |             |
|---|-------------|-------------|-------------|
| C | -1.26528295 | 2.24594619  | -0.90762428 |
| C | -1.96426302 | 1.06288740  | -0.59407371 |
| C | -1.34221825 | -0.10575856 | -0.26620003 |
| C | 0.12431537  | -0.20677287 | -0.13537763 |
| C | 0.85396724  | 0.82618229  | 0.50893970  |
| C | 0.19297848  | 1.95033440  | 1.12433522  |
| C | 2.24993173  | 0.73653505  | 0.51387526  |
| C | 2.90940706  | -0.34580186 | -0.04945794 |
| C | 2.18510145  | -1.36886122 | -0.64263887 |
| C | 0.79783322  | -1.28633230 | -0.68811110 |
| C | -1.87892644 | -1.97916702 | 1.06229147  |
| O | -2.09036486 | -1.23742011 | -0.13049391 |
| H | -1.79906535 | 3.18209345  | -0.97686634 |
| H | -0.77861171 | 1.83825822  | 1.57476245  |

|   |             |             |             |
|---|-------------|-------------|-------------|
| H | 0.79029365  | 2.79890922  | 1.42679944  |
| H | 0.22072881  | -2.06171414 | -1.17686577 |
| H | 2.69186416  | -2.21810643 | -1.07939254 |
| H | 3.98960571  | -0.39109058 | -0.01897590 |
| H | 2.81841991  | 1.52327589  | 0.99363995  |
| H | -2.55970938 | -2.82499343 | 1.02382537  |
| H | -2.10810500 | -1.36369207 | 1.93571959  |
| H | -0.85213375 | -2.33864689 | 1.13736578  |
| H | -3.04676826 | 1.07283390  | -0.54691120 |
| H | -0.27830319 | 2.21380654  | -1.34046343 |

UM06-2X Energy = -501.449234058  
 NIMAG = 1  
 $\langle S^2 \rangle$  = 0.8807  
 UM06-2X H = -501.240842998  
 UM06-2X G (HO) = -501.288171849  
 UM06-2X G (GR) = -501.287777099

#### 4-Methoxy-1,2-dihydronaphthalene

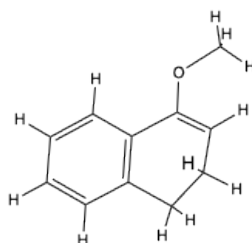

#### M06-2X Optimized Geometry

|   |             |             |             |
|---|-------------|-------------|-------------|
| C | -2.17410690 | -1.74007919 | -0.16120087 |
| C | -2.99740274 | -0.63157776 | -0.03474828 |
| C | -2.43871697 | 0.63075432  | 0.11813497  |
| C | -1.06291929 | 0.80135232  | 0.14111763  |
| C | -0.23523112 | -0.31964492 | 0.00406621  |
| C | -0.79620188 | -1.58456866 | -0.14107303 |
| C | -0.42591688 | 2.14610145  | 0.36768995  |
| C | 0.87430561  | 2.28542502  | -0.41539076 |
| C | 1.76233919  | 1.08859467  | -0.20084449 |
| C | 1.22596306  | -0.12013088 | -0.00229915 |
| C | 3.32002581  | -1.19207296 | 0.12904088  |
| O | 1.91525800  | -1.27746272 | 0.16486288  |
| H | -2.60370571 | -2.72572623 | -0.27832553 |
| H | -4.07264581 | -0.74782670 | -0.05344903 |
| H | -3.08027713 | 1.49720745  | 0.22329646  |
| H | -0.14408609 | -2.44031804 | -0.23958808 |
| H | -0.20155396 | 2.24295185  | 1.43556740  |
| H | -1.12515121 | 2.94192130  | 0.11105649  |
| H | 1.39316194  | 3.19388139  | -0.11017684 |
| H | 0.65274280  | 2.39632950  | -1.48309943 |
| H | 2.83190210  | 1.22327458  | -0.26181803 |
| H | 3.69610245  | -2.19817401 | 0.28967989  |
| H | 3.69049783  | -0.53136053 | 0.91711138  |
| H | 3.66616751  | -0.82064115 | -0.83888056 |

M06-2X Energy = -501.568600147  
 NIMAG = 1  
 M06-2X H = -501.353195021  
 M06-2X G (HO) = -501.398964753  
 M06-2X G (GR) = -501.398684126

## Data for main text Figure 9

### First-Order Saddle Point for Disrotatory Ring Closure of (5Z,6E)-5-Ethylidene-6-((Z)-1-methoxybut-2-en-1-ylidene)cyclohexa-1,3-diene

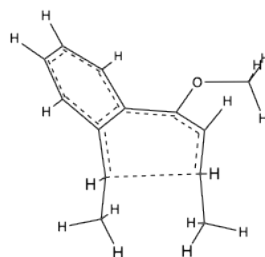

#### M06-2X Optimized Geometry

|   |             |             |             |
|---|-------------|-------------|-------------|
| C | -0.93841583 | -0.93607939 | -0.18403032 |
| C | -0.55907495 | 0.35480901  | 0.33497710  |
| C | 0.70857704  | 0.89566480  | 0.06047489  |
| C | 1.59392883  | 0.31079546  | -0.88062550 |
| C | 2.05739469  | -0.97525423 | -0.93196511 |
| C | -1.61180158 | 1.26179653  | 0.69414335  |
| C | -2.88285875 | 1.03951371  | 0.26970822  |
| C | -3.18087285 | -0.08297516 | -0.55206871 |
| C | -2.22859390 | -1.02399017 | -0.79105528 |
| C | -0.14244635 | -2.06518032 | -0.07108845 |
| C | 2.85097264  | -1.62808409 | 0.16151775  |
| C | 0.35667894  | -2.50129290 | 1.27843986  |
| C | 2.05248978  | 2.86273999  | 0.04651818  |
| O | 0.83132824  | 2.21882497  | 0.34799714  |
| H | 1.74619801  | 0.94202412  | -1.75532898 |
| H | 2.35513363  | -1.31599945 | -1.92108294 |
| H | -2.47235418 | -1.92797242 | -1.33616511 |
| H | -4.18130829 | -0.21217333 | -0.94214947 |
| H | -3.66624869 | 1.74265609  | 0.51804072  |
| H | -1.36137815 | 2.16292106  | 1.23314520  |
| H | -0.41341520 | -2.89100534 | -0.72518903 |
| H | 2.57077588  | -1.27737878 | 1.15047586  |
| H | 3.89597524  | -1.34668851 | -0.00107908 |
| H | 2.81127981  | -2.71427745 | 0.12911705  |
| H | 0.59185445  | -1.65558387 | 1.92038135  |
| H | 1.20777157  | -3.17502506 | 1.24430680  |
| H | -0.45759512 | -3.05612688 | 1.75616149  |
| H | 2.07244383  | 3.77288162  | 0.64047199  |
| H | 2.11353333  | 3.12787051  | -1.01026092 |
| H | 2.90255527  | 2.22818923  | 0.30418927  |

|               |   |                |
|---------------|---|----------------|
| M06-2X Energy | = | -580.057862831 |
| NIMAG         | = | 1              |
| M06-2X H      | = | -579.787468710 |
| M06-2X G (HO) | = | -579.840174331 |
| M06-2X G (GR) | = | -579.839277193 |

### First-Order Saddle Point for Conrotatory Ring Closure of (5Z,6E)-5-Ethylidene-6-((Z)-1-methoxybut-2-en-1-ylidene)cyclohexa-1,3-diene

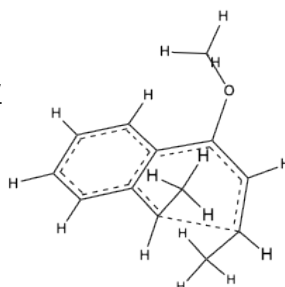

#### UM06-2X Optimized Geometry

|   |             |             |             |
|---|-------------|-------------|-------------|
| C | 0.25805809  | -1.61768237 | 1.19876271  |
| C | -0.72018171 | -0.73430248 | 0.56570946  |
| C | -0.35914029 | 0.43363086  | -0.15110523 |
| C | 1.04977696  | 0.75699641  | -0.42401194 |
| C | 2.00804566  | -0.17836828 | -0.69884419 |
| C | 1.77833982  | -1.54134069 | -0.96660419 |

|   |             |             |             |
|---|-------------|-------------|-------------|
| C | -1.35605518 | 1.25485399  | -0.67199417 |
| C | -2.69897200 | 0.93303343  | -0.54127787 |
| C | -3.05800525 | -0.23896812 | 0.10714916  |
| C | -2.07621947 | -1.05633123 | 0.64921877  |
| C | 0.65355530  | -2.09776713 | -1.78459488 |
| C | 1.22050493  | -1.13163634 | 2.22733995  |
| C | 1.12818801  | 2.80370241  | 0.75682949  |
| O | 1.41636047  | 2.07638871  | -0.42716506 |
| H | 2.62817121  | -2.20211657 | -0.83996596 |
| H | 3.03439556  | 0.16927690  | -0.63272162 |
| H | -2.36181532 | -1.95819205 | 1.17635906  |
| H | -4.09967440 | -0.51512652 | 0.19925316  |
| H | -3.45516405 | 1.58219581  | -0.96080201 |
| H | -1.05741808 | 2.14021580  | -1.21951526 |
| H | -0.01255834 | -2.66639704 | 1.23768015  |
| H | 2.03210206  | -1.84291080 | 2.37854337  |
| H | 0.71641473  | -0.99547439 | 3.19151461  |
| H | 1.64910016  | -0.16953634 | 1.95037742  |
| H | -0.11351282 | -1.35642226 | -1.99307703 |
| H | 0.17758356  | -2.95778859 | -1.30944422 |
| H | 1.04932651  | -2.44472291 | -2.74374247 |
| H | 1.45979269  | 3.82385252  | 0.58207981  |
| H | 1.67624502  | 2.38391538  | 1.60443566  |
| H | 0.06122670  | 2.80065771  | 0.98435702  |

UM06-2X Energy = -580.063705103  
 NIMAG = 1  
 $\langle S^2 \rangle$  = 0.9437  
 UM06-2X H = -579.795966913  
 UM06-2X G (HO) = -579.851561888  
 UM06-2X G (GR) = -579.850401817

First-Order Saddle Point for Disrotatory  
 Ring Closure of (5Z,6E)-5-Ethylidene-6-  
 ((E)-1-methoxybut-2-en-1-ylidene)  
 cyclohexa-1,3-diene

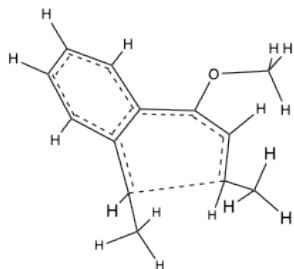

**M06-2X Optimized Geometry**

|   |             |             |             |
|---|-------------|-------------|-------------|
| C | 2.93908679  | -1.73851440 | -1.31153439 |
| C | 2.08448417  | -1.07433570 | -0.27144790 |
| C | 1.73290840  | 0.24547084  | -0.39114109 |
| C | 0.64540186  | 0.94283090  | 0.17774125  |
| C | -0.65698507 | 0.42240249  | 0.27444214  |
| C | -0.91747500 | -0.97177230 | 0.04673991  |
| C | -2.11850608 | -1.29980207 | -0.65816429 |
| C | -3.11435841 | -0.38824732 | -0.80665160 |
| C | -2.95631001 | 0.93096172  | -0.29662893 |
| C | -1.76510718 | 1.32943093  | 0.22040260  |
| C | -0.08652883 | -1.97688335 | 0.51702083  |
| C | 0.42148405  | -1.98565543 | 1.93476860  |
| C | 1.97068701  | 2.93145608  | 0.16661280  |
| O | 0.71518493  | 2.29928935  | 0.28706104  |
| H | -1.61335956 | 2.35321206  | 0.52667332  |
| H | -3.77802432 | 1.63108098  | -0.36205167 |
| H | -4.04721490 | -0.67432454 | -1.27346541 |
| H | -2.25986568 | -2.32727035 | -0.97101143 |
| H | 0.67030759  | -0.98580861 | 2.28573602  |



|   |             |             |             |
|---|-------------|-------------|-------------|
| H | 1.29415018  | -2.62795217 | 2.06380263  |
| H | -0.36049428 | -2.38569228 | 2.58675150  |
| H | -0.26937944 | -2.96623003 | 0.10389830  |
| H | 1.85472385  | 3.92262228  | 0.59742365  |
| H | 2.27000060  | 3.03392899  | -0.87863695 |
| H | 2.74268269  | 2.37944528  | 0.70615969  |
| H | 2.25583820  | 0.81655914  | -1.15609832 |
| H | 2.09779237  | -1.54521834 | 0.68851935  |
| H | 3.95167098  | -1.91050950 | -0.93874726 |
| H | 2.99681594  | -1.14453556 | -2.22238358 |
| H | 2.52878608  | -2.71409475 | -1.57542315 |

|               |   |                |
|---------------|---|----------------|
| M06-2X Energy | = | -580.079193097 |
| NIMAG         | = | 1              |
| M06-2X H      | = | -579.808949832 |
| M06-2X G (HO) | = | -579.862909611 |
| M06-2X G (GR) | = | -579.861936790 |

First-Order Saddle Point for Conrotatory  
Ring Closure of (5Z,6E)-5-Ethylidene-6-  
((E)-1-methoxybut-2-en-1-ylidene)  
cyclohexa-1,3-diene

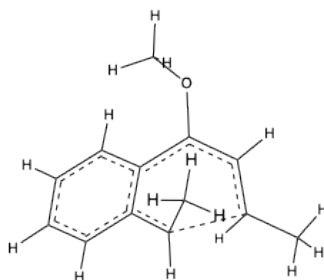

UM06-2X Optimized Geometry

|   |             |             |             |
|---|-------------|-------------|-------------|
| C | 3.53152471  | -0.99646622 | -1.05709294 |
| C | 2.11101174  | -0.54644713 | -0.97704683 |
| C | 1.75581825  | 0.74933135  | -0.60065850 |
| C | 0.47597617  | 1.14802892  | -0.30701100 |
| C | -0.66210143 | 0.22134795  | -0.22103078 |
| C | -0.52586428 | -1.07862232 | 0.32818711  |
| C | 0.71610618  | -1.55845910 | 0.94186220  |
| C | 1.33867968  | -0.87088298 | 2.10787433  |
| C | -1.62844302 | -1.93230367 | 0.27342821  |
| C | -2.84541303 | -1.52530403 | -0.25581732 |
| C | -2.98440326 | -0.23789580 | -0.75029755 |
| C | -1.89456414 | 0.61950595  | -0.73562446 |
| C | -0.39194465 | 2.87869025  | 1.04628970  |
| O | 0.23207675  | 2.48678955  | -0.16668792 |
| H | 2.37267490  | -1.18674949 | 2.24964882  |
| H | 0.79314041  | -1.10245574 | 3.03026448  |
| H | 1.31959852  | 0.21196305  | 1.98695977  |
| H | 0.91815215  | -2.61703275 | 0.82810996  |
| H | -1.97809427 | 1.61433639  | -1.15494657 |
| H | -3.92858437 | 0.09387477  | -1.15998177 |
| H | -3.68123047 | -2.21144340 | -0.27435029 |
| H | -1.52861788 | -2.93125501 | 0.67957787  |
| H | -0.52721602 | 3.95569818  | 0.99159049  |
| H | 0.24720836  | 2.63475052  | 1.89871964  |
| H | -1.36156048 | 2.39554599  | 1.17664001  |
| H | 2.53454773  | 1.49545229  | -0.47624463 |
| H | 1.36403449  | -1.18764235 | -1.42240110 |
| H | 4.20522738  | -0.26558068 | -0.61115549 |
| H | 3.84177377  | -1.15684214 | -2.09381846 |

H 3.67561621 -1.94762997 -0.53918139

UM06-2X Energy = -580.068902034

NIMAG = 1

<S<sup>2</sup>> = 0.9188

UM06-2X H = -579.801105516

UM06-2X G (HO) = -579.856727533

UM06-2X G (GR) = -579.855677686

### Data for main text Figure 10

First-Order Saddle Point for Disrotatory  
Ring Closure of (2Z,3E)-2-Ethylidene-3-((E)-  
1-methoxybut-2-en-1-ylidene)-  
2,3-dihydronaphthalene

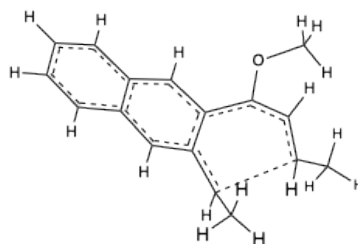

### M06-2X Optimized Geometry

|   |             |             |             |
|---|-------------|-------------|-------------|
| C | 3.94392455  | -1.42017725 | -1.62314418 |
| C | 3.15095022  | -0.84125796 | -0.49022749 |
| C | 2.60482800  | 0.40827809  | -0.57717249 |
| C | 1.53194703  | 0.99835460  | 0.13171379  |
| C | 0.31935901  | 0.34849578  | 0.43038353  |
| C | 0.18972335  | -1.08846285 | 0.30295021  |
| C | -1.03778784 | -1.57929928 | -0.20660277 |
| C | -2.16642445 | -0.79384000 | -0.25049380 |
| C | -2.08994420 | 0.57738741  | 0.19509165  |
| C | -0.86540764 | 1.11922855  | 0.51627331  |
| C | -3.29546861 | 1.35526649  | 0.21946563  |
| C | -4.47687839 | 0.82479815  | -0.16931512 |
| C | -4.55172650 | -0.53589943 | -0.61610076 |
| C | -3.44418496 | -1.31012459 | -0.65374458 |
| C | 1.17516689  | -1.96799474 | 0.72158590  |
| C | 1.90663003  | -1.80133594 | 2.02431150  |
| C | 2.61994589  | 3.11664267  | -0.08686183 |
| O | 1.46657422  | 2.35640871  | 0.20291943  |
| H | -0.79418005 | 2.17389689  | 0.73920385  |
| H | -3.49913364 | -2.33980103 | -0.98460881 |
| H | -5.50763074 | -0.93822389 | -0.92302659 |
| H | -5.37699456 | 1.42387239  | -0.14853786 |
| H | -3.23224076 | 2.38370962  | 0.55254969  |
| H | -1.11558398 | -2.63614424 | -0.43619122 |
| H | 2.06948908  | -0.75452101 | 2.27288287  |
| H | 2.86995180  | -2.31406154 | 2.03700970  |
| H | 1.30839668  | -2.24944046 | 2.82355691  |
| H | 1.04855741  | -2.99979082 | 0.40423044  |
| H | 2.44916911  | 4.10157701  | 0.33952384  |
| H | 2.77228197  | 3.22002161  | -1.16295318 |
| H | 3.50917680  | 2.66748472  | 0.35884470  |
| H | 2.94386939  | 1.01859578  | -1.41234965 |
| H | 3.29224740  | -1.31632895 | 0.45635379  |
| H | 4.98885271  | -1.56687194 | -1.34170366 |
| H | 3.90296322  | -0.78592815 | -2.50742103 |
| H | 3.55030006  | -2.39967383 | -1.89939412 |

M06-2X Energy = -733.701607665

NIMAG = 1

M06-2X H = -733.381388877

M06-2X G (HO) = -733.441745535  
M06-2X G (GR) = -733.440218778

First-Order Saddle Point for Conrotatory  
Ring Closure of (2Z,3E)-2-Ethylidene-3-((E)-  
1-methoxybut-2-en-1-ylidene)-  
2,3-dihydronaphthalene

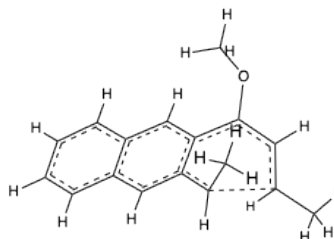

UM06-2X Optimized Geometry

|   |             |             |             |
|---|-------------|-------------|-------------|
| C | 4.03529042  | -1.60178741 | -1.52681440 |
| C | 2.77381389  | -0.86225998 | -1.23050987 |
| C | 2.76406025  | 0.45236796  | -0.77901415 |
| C | 1.65133860  | 1.10081039  | -0.29402940 |
| C | 0.36591683  | 0.43373647  | -0.05934373 |
| C | 0.29975519  | -0.91790669 | 0.45387956  |
| C | 1.48256755  | -1.64646127 | 0.90072796  |
| C | 2.41101516  | -1.11917796 | 1.93970795  |
| C | -0.92955500 | -1.52752281 | 0.51454274  |
| C | -2.13215130 | -0.86882537 | 0.15442143  |
| C | -2.06557022 | 0.47528936  | -0.28392572 |
| C | -0.79280966 | 1.08773617  | -0.38892450 |
| C | -3.25800372 | 1.14715148  | -0.62947642 |
| C | -4.46775360 | 0.51186465  | -0.54033833 |
| C | -4.53489406 | -0.82538082 | -0.10147854 |
| C | -3.39216390 | -1.50002445 | 0.23701404  |
| C | 1.37848843  | 2.93319384  | 1.17305342  |
| O | 1.72232066  | 2.45490999  | -0.11867738 |
| H | 2.58024715  | -0.04956376 | 1.82485026  |
| H | 3.37420354  | -1.62962871 | 1.90735683  |
| H | 1.99116772  | -1.27319412 | 2.94065489  |
| H | 1.43517649  | -2.72360647 | 0.79211667  |
| H | -0.72866726 | 2.09560460  | -0.78286411 |
| H | -3.44014945 | -2.52758547 | 0.57523025  |
| H | -5.49521159 | -1.31806041 | -0.03326624 |
| H | -5.37626319 | 1.03358090  | -0.80826883 |
| H | -3.19824075 | 2.17330973  | -0.97004133 |
| H | -0.99494758 | -2.54320715 | 0.88771822  |
| H | 1.44441912  | 4.01697006  | 1.13044747  |
| H | 2.08404424  | 2.55485837  | 1.91689041  |
| H | 0.36701336  | 2.63920709  | 1.45600419  |
| H | 3.69561271  | 1.00928974  | -0.75561885 |
| H | 1.84776493  | -1.31776082 | -1.54958440 |
| H | 4.12069254  | -1.83485123 | -2.59153574 |
| H | 4.06732270  | -2.55637452 | -0.99566439 |
| H | 4.91118089  | -1.02508907 | -1.23195853 |

UM06-2X Energy = -733.703877435  
NIMAG = 1  
<S<sup>2</sup>> = 0.9001  
UM06-2X H = -733.386096482  
UM06-2X G (HO) = -733.448066790  
UM06-2X G (GR) = -733.446395560

**Data for main text Scheme 10**

Results in this section used the aug-cc-pVTZ basis set.

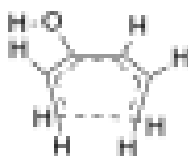

First-Order Saddle Point for Disrotatory  
Ring Closure of (E)-1,3,5-Hexatrien-3-ol

M06-2X Optimized Geometry

|   |             |             |             |
|---|-------------|-------------|-------------|
| C | 0.85937039  | 1.65351848  | 0.03837554  |
| C | -0.42187787 | 1.20515317  | -0.24583519 |
| C | -0.92623685 | -0.04927106 | 0.10661462  |
| C | -0.15437521 | -1.21212658 | 0.07332114  |
| C | 1.20340821  | -1.22129715 | -0.21352006 |
| C | 2.08454881  | -0.21344796 | 0.15092060  |
| O | -2.27821907 | -0.26448745 | 0.09573762  |
| H | 3.05060750  | -0.16516673 | -0.33797683 |
| H | 2.09999395  | 0.08589839  | 1.18123071  |
| H | 1.55087907  | -2.01006108 | -0.87381333 |
| H | -0.73123515 | -2.12002626 | -0.05754298 |
| H | -2.73225612 | 0.58022983  | 0.13610751  |
| H | -1.02424347 | 1.74658465  | -0.97125415 |
| H | 1.26082361  | 2.44902846  | -0.58018851 |
| H | 1.19079383  | 1.69591665  | 1.05709529  |

M06-2X Energy = -308.550557391  
NIMAG = 1  
M06-2X H = -308.418650610  
M06-2X G (HO) = -308.456498474  
M06-2X G (GR) = -308.456207922

First-Order Saddle Point for Disrotatory  
Ring Closure of (E)-1,3,5-Hexatrien-3-oxide

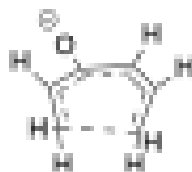

M06-2X Optimized Geometry

|   |             |             |             |
|---|-------------|-------------|-------------|
| C | -0.83791267 | 1.62048087  | 0.01171006  |
| C | 0.46253423  | 1.18435202  | 0.26062999  |
| C | 1.04640285  | -0.06771340 | -0.15436497 |
| C | 0.15576098  | -1.21144749 | 0.04007238  |
| C | -1.19538173 | -1.19374044 | 0.28521135  |
| C | -2.05322318 | -0.15478822 | -0.13242820 |
| O | 2.27966312  | -0.24234969 | -0.30324297 |
| H | -3.04091535 | -0.10154422 | 0.31972012  |
| H | -2.06757928 | 0.06670422  | -1.18610573 |
| H | -1.58762803 | -1.96100419 | 0.95318593  |
| H | 0.71619579  | -2.10177807 | 0.31201566  |
| H | 1.04430338  | 1.67767569  | 1.03310960  |
| H | -1.23144267 | 2.38711102  | 0.68020761  |
| H | -1.17665169 | 1.76988570  | -1.00045402 |

M06-2X Energy = -307.983838897  
NIMAG = 1  
M06-2X H = -307.866493470  
M06-2X G (HO) = -307.903824400  
M06-2X G (GR) = -307.903532089

First-Order Saddle Point for Conrotatory  
Ring Closure of (E)-1,3,5-Hexatrien-3-ol

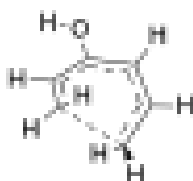

UM06-2X Optimized Geometry

|   |             |             |             |
|---|-------------|-------------|-------------|
| C | 1.94018823  | 0.15900874  | -0.61532382 |
| C | 1.27852993  | 1.15040090  | 0.16950709  |
| C | -0.06333663 | 1.15933773  | 0.41170606  |
| C | -0.91615539 | 0.05917493  | 0.01553027  |
| C | -0.47917346 | -1.23882621 | -0.03752070 |
| C | 0.79593693  | -1.64846211 | 0.44135044  |
| O | -2.19260201 | 0.42225128  | -0.29249118 |
| H | 1.16784966  | -2.62795633 | 0.17836361  |
| H | 1.21426516  | -1.19507753 | 1.32683900  |
| H | -1.11968993 | -1.97330311 | -0.51792485 |
| H | -2.72835609 | -0.36514014 | -0.42502428 |
| H | -0.52780727 | 1.99295639  | 0.92148400  |
| H | 1.88558572  | 1.92153933  | 0.62972578  |
| H | 3.01619351  | 0.07364573  | -0.56958636 |
| H | 1.45641382  | -0.24918882 | -1.48892740 |

UM06-2X Energy = -308.514354370  
 NIMAG = 1  
 $\langle S^2 \rangle$  = 0.9849  
 UM06-2X H = -308.386643075  
 UM06-2X G (HO) = -308.424576533  
 UM06-2X G (GR) = -308.424565705

First-Order Saddle Point for Conrotatory  
 Ring Closure of (*E*)-1,3,5-Hexatrien-3-oxide

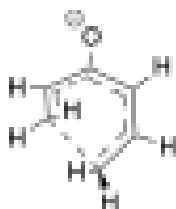

UM06-2X Optimized Geometry

|   |             |             |             |
|---|-------------|-------------|-------------|
| C | -0.81090366 | 1.47716825  | 0.42543492  |
| C | 0.45933147  | 1.26887895  | -0.08522599 |
| C | 1.05078333  | -0.05197498 | 0.03099379  |
| C | 0.11591892  | -1.13581414 | 0.46471544  |
| C | -1.19846649 | -1.13534063 | 0.11323855  |
| C | -1.95304294 | -0.12439553 | -0.59032578 |
| O | 2.21642934  | -0.31064963 | -0.27400274 |
| H | -1.32420876 | 2.40841375  | 0.20811612  |
| H | -1.53853548 | 0.31842369  | -1.48420351 |
| H | -3.01913680 | -0.33479367 | -0.67329306 |
| H | -1.77935953 | -1.97495085 | 0.49744544  |
| H | 0.53856952  | -1.95605656 | 1.03081771  |
| H | 0.86431461  | 1.91784438  | -0.85231017 |
| H | -1.09911681 | 0.99690488  | 1.34951145  |

UM06-2X Energy = -307.975037287  
 NIMAG = 1  
 $\langle S^2 \rangle$  = 0.0000  
 UM06-2X H = -307.858688782  
 UM06-2X G (HO) = -307.895487371  
 UM06-2X G (GR) = -307.895470537

**Data for main text Scheme 11**

Results in this section used the SMD solvation model for DMSO.

7-Alkoxy-7-vinylbicyclo[4.2.0]octa-1,3,5-triene anion with a  
 Tetramethylammonium Counterion

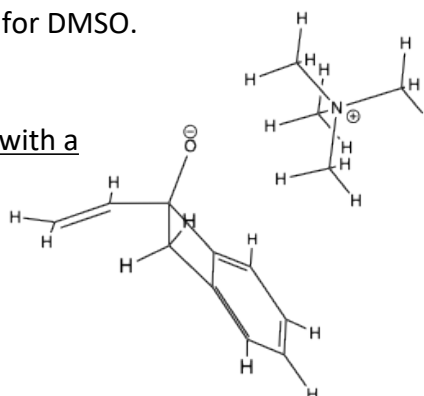

### M06-2X Optimized Geometry

|   |             |             |             |
|---|-------------|-------------|-------------|
| C | -1.18102616 | 1.16540355  | -0.00257691 |
| C | -1.23824916 | -0.34559846 | -0.40500191 |
| C | -1.63488416 | -0.75572046 | 0.86027009  |
| C | -1.81719416 | -2.09018747 | 1.17690709  |
| C | -1.56929116 | -3.01279147 | 0.15519209  |
| C | -1.15680816 | -2.60336447 | -1.11246092 |
| C | -0.97863716 | -1.25013947 | -1.42006992 |
| C | -1.64841516 | 0.63784954  | 1.44681810  |
| C | -2.23734417 | 1.95438755  | -0.75156092 |
| C | -3.34948317 | 2.51236655  | -0.28759591 |
| O | 0.01407885  | 1.76539755  | -0.07597991 |
| H | -0.65063116 | -0.95027046 | -2.40878492 |
| H | -0.97352016 | -3.35448848 | -1.87114992 |
| H | -1.69373616 | -4.07065048 | 0.35011409  |
| H | -2.12446717 | -2.42773347 | 2.15938510  |
| H | -0.86388016 | 0.82372254  | 2.18147510  |
| H | -2.60408117 | 0.97983954  | 1.84636110  |
| H | -3.66241217 | 2.41206455  | 0.74505909  |
| H | -3.98948417 | 3.10543556  | -0.93093192 |
| H | -1.97244516 | 2.10760655  | -1.79689792 |
| N | 2.98160286  | 0.24521354  | 0.06682809  |
| C | 4.32689187  | -0.38221246 | 0.06804109  |
| C | 2.05590086  | -0.52519546 | 0.94511109  |
| C | 2.42835286  | 0.27137854  | -1.31802592 |
| C | 3.06588486  | 1.64462055  | 0.57602909  |
| H | 4.70286187  | -0.39328946 | 1.08782109  |
| H | 4.23646987  | -1.39622547 | -0.31333391 |
| H | 4.98136987  | 0.20551354  | -0.57032891 |
| H | 1.10987985  | 0.01330054  | 0.94625009  |
| H | 1.94216485  | -1.52646747 | 0.53471209  |
| H | 2.48906786  | -0.57153546 | 1.94134810  |
| H | 3.11816386  | 0.83084054  | -1.94591592 |
| H | 2.34685786  | -0.75425746 | -1.67059492 |
| H | 1.45497285  | 0.76255254  | -1.25559892 |
| H | 3.73648186  | 2.20297655  | -0.07268991 |
| H | 2.05560486  | 2.05301755  | 0.55332909  |
| H | 3.46177686  | 1.61432455  | 1.58835910  |

M06-2X Energy = -675.944655066

NIMAG = 0

M06-2X H = -675.601273759

M06-2X G (HO) = -675.665007083

M06-2X G (GR) = -675.661955268

### First Order Saddle Point for Conrotatory Inward Ring Opening of 7-Alkoxy-7-vinylbicyclo[4.2.0]octa- 1,3,5-triene anion with a Tetramethyl- ammonium Counterion

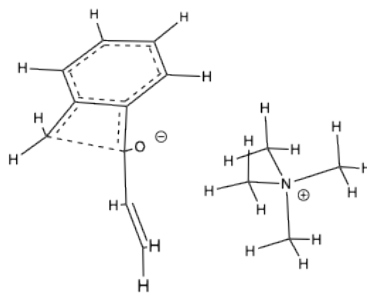

### M06-2X Optimized Geometry

|   |            |             |             |
|---|------------|-------------|-------------|
| C | 0.72591598 | 0.97320360  | 0.37182596  |
| C | 1.67501698 | -0.18790440 | 0.18129996  |
| C | 2.92496599 | 0.41874760  | 0.26095996  |
| C | 4.06893299 | -0.28951940 | -0.10780004 |

|   |             |             |             |
|---|-------------|-------------|-------------|
| C | 3.92319399  | -1.63677141 | -0.42742504 |
| C | 2.67509399  | -2.26433141 | -0.38487204 |
| C | 1.52299198  | -1.54258541 | -0.07638504 |
| C | 2.59841099  | 1.76900861  | 0.73392596  |
| C | 0.49847198  | 1.74286861  | -0.89285504 |
| C | -0.59722203 | 2.47073561  | -1.10819305 |
| O | -0.15705803 | 0.97577260  | 1.27317597  |
| H | 0.55314198  | -2.02643141 | -0.09011004 |
| H | 2.60379599  | -3.31782242 | -0.62433804 |
| H | 4.79518800  | -2.21974341 | -0.69759204 |
| H | 5.04898500  | 0.17368660  | -0.11449104 |
| H | 3.16112099  | 2.62236361  | 0.35220196  |
| H | 2.40887799  | 1.83792661  | 1.80123297  |
| H | 1.27125998  | 1.66843761  | -1.65137605 |
| H | -1.36033703 | 2.54505361  | -0.34214704 |
| H | -0.74159503 | 3.02490261  | -2.02710805 |
| N | -3.45158804 | -0.50524440 | 0.00627896  |
| C | -2.14997304 | -1.18668341 | -0.23988904 |
| C | -3.80480104 | 0.32439160  | -1.17775505 |
| C | -3.32504704 | 0.36704460  | 1.20852797  |
| C | -4.51463405 | -1.52108241 | 0.23183096  |
| H | -2.25690404 | -1.82797541 | -1.11091305 |
| H | -1.39349203 | -0.42211540 | -0.39885704 |
| H | -1.90318103 | -1.77527041 | 0.64021296  |
| H | -4.76011005 | 0.80642060  | -0.98708205 |
| H | -3.02412004 | 1.06721261  | -1.32355105 |
| H | -3.87435604 | -0.32631840 | -2.04550905 |
| H | -3.13399104 | -0.27149640 | 2.06740497  |
| H | -2.48161404 | 1.03789660  | 1.05846396  |
| H | -4.25926505 | 0.90754660  | 1.33665097  |
| H | -4.23862505 | -2.12186841 | 1.09471296  |
| H | -5.45258905 | -1.00305841 | 0.41348096  |
| H | -4.58815605 | -2.14343641 | -0.65605004 |

M06-2X Energy = -675.931419480  
NIMAG = 1  
M06-2X H = -675.590141078  
M06-2X G (HO) = -675.654249795  
M06-2X G (GR) = -675.651093499

First Order Saddle Point for  
Internal Rotation of (*E*)-1-(6-methylene-  
cyclohexa-2,4-dien-1-ylidene)prop-  
2-en-1-ol anion with a Tetramethyl-  
ammonium Counterion

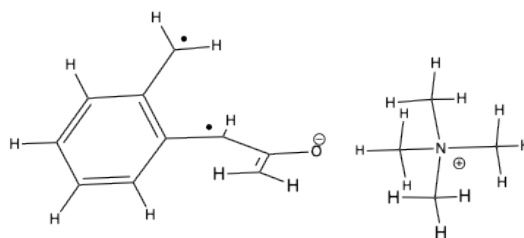

UM06-2X Optimized Geometry

|   |             |             |             |
|---|-------------|-------------|-------------|
| C | -0.02964015 | 0.00621886  | 0.62997832  |
| C | -0.96944337 | -0.22603036 | -0.44759588 |
| C | -2.43796549 | -0.27316090 | -0.30495508 |
| C | -3.22453834 | 0.91978588  | -0.35108577 |
| C | -4.63255565 | 0.80107798  | -0.23813882 |
| C | -5.24115988 | -0.42467147 | -0.07698537 |
| C | -4.46635099 | -1.58277870 | -0.01960211 |
| C | -3.08175399 | -1.49215953 | -0.13322897 |
| C | -2.63518842 | 2.18927724  | -0.48385925 |
| C | -0.56187820 | 0.24279098  | 1.89281143  |

|   |             |             |             |
|---|-------------|-------------|-------------|
| O | 1.23180781  | -0.00585398 | 0.36068861  |
| H | -2.48219573 | -2.39382206 | -0.09273656 |
| H | -4.93578607 | -2.54893193 | 0.10951567  |
| H | -6.31825106 | -0.48717710 | 0.00760866  |
| H | -5.23008107 | 1.70409385  | -0.27717721 |
| H | -3.25518592 | 3.07457466  | -0.51289311 |
| H | -1.56575654 | 2.31114865  | -0.56372222 |
| H | -0.55074755 | -0.35898779 | -1.44015789 |
| H | 0.09862645  | 0.43701217  | 2.72936897  |
| H | -1.62819437 | 0.24334468  | 2.07146680  |
| N | 4.51262455  | -0.05059266 | -0.18268901 |
| C | 3.80096366  | -0.81332580 | -1.24779440 |
| C | 4.01167065  | 1.35306030  | -0.17333953 |
| C | 5.97541556  | -0.06796605 | -0.43913261 |
| C | 4.21960402  | -0.67895567 | 1.13713354  |
| H | 2.73746819  | -0.77468072 | -1.01550280 |
| H | 4.01474200  | -0.34310067 | -2.20465225 |
| H | 4.17259507  | -1.83502943 | -1.23932904 |
| H | 4.53337242  | 1.89574058  | 0.61114061  |
| H | 4.22240638  | 1.79651742  | -1.14350718 |
| H | 2.94064336  | 1.31075938  | 0.01852131  |
| H | 6.31203708  | -1.10131893 | -0.43935086 |
| H | 6.16079506  | 0.39084160  | -1.40706745 |
| H | 6.47230544  | 0.49202821  | 0.34889024  |
| H | 4.57632399  | -1.70556365 | 1.11099880  |
| H | 4.74403611  | -0.11769637 | 1.90667222  |
| H | 3.14106294  | -0.63621049 | 1.28156988  |

UM06-2X Energy = -675.909523981  
 NIMAG = 1  
 <S<sup>2</sup>> = 1.0447  
 UM06-2X H = -675.571168083  
 UM06-2X G (HO) = -675.636802969  
 UM06-2X G (GR) = -675.633080848

First Order Saddle Point for  
Conrotatory Ring Closure of  
(E)-1-(6-Methylenecyclohexa-2,4-  
dien-1-ylidene)prop-2-en-1-ol Anion with a  
Tetramethylammonium Counterion

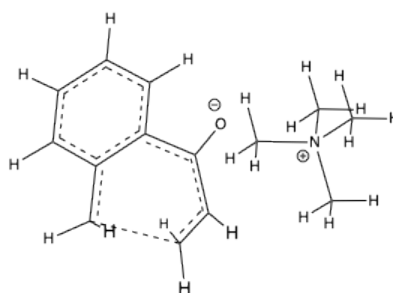

**M06-2X Optimized Geometry**

|   |             |             |             |
|---|-------------|-------------|-------------|
| C | -0.63499633 | -1.79637093 | -1.48931908 |
| C | -0.29207820 | -2.11366934 | -0.19877474 |
| C | -0.62179522 | -1.20393458 | 0.86972871  |
| C | -1.47477556 | -0.01577405 | 0.49297040  |
| C | -2.58368636 | -0.15983258 | -0.40189254 |
| C | -2.93983348 | -1.38404059 | -1.05949935 |
| C | -3.27162261 | 1.04353328  | -0.69593452 |
| C | -2.90262562 | 2.26973225  | -0.16732670 |
| C | -1.82684953 | 2.37938481  | 0.70925529  |
| C | -1.12641169 | 1.21620889  | 1.02140385  |
| O | -0.28447824 | -1.37275008 | 2.04194592  |
| H | -3.83127251 | -1.31973519 | -1.68135001 |
| H | -2.82248968 | -2.32849622 | -0.55176846 |
| H | -0.28068251 | 1.25515888  | 1.69998604  |
| H | -1.54681175 | 3.33140636  | 1.13886590  |
| H | -3.47367280 | 3.15115029  | -0.43521877 |



|   |             |             |             |
|---|-------------|-------------|-------------|
| H | -4.12729274 | 0.99394671  | -1.36020210 |
| H | -0.03825551 | -3.13001418 | 0.07810332  |
| H | -0.66331830 | -0.77026387 | -1.82437367 |
| H | -0.53287914 | -2.53919044 | -2.27325121 |
| N | 3.16039229  | 0.27636704  | -0.22176061 |
| C | 2.02364676  | 1.01454802  | -0.83908267 |
| C | 4.38212539  | 1.12618669  | -0.25820942 |
| C | 2.82560612  | -0.05224308 | 1.19213922  |
| C | 3.40501074  | -0.98199755 | -0.97889924 |
| H | 2.28026170  | 1.23921683  | -1.87126116 |
| H | 1.13974943  | 0.38194193  | -0.79435023 |
| H | 1.86683558  | 1.93185216  | -0.27765392 |
| H | 4.17995912  | 2.03842616  | 0.29649617  |
| H | 5.19787707  | 0.57490690  | 0.20173247  |
| H | 4.61253907  | 1.35355019  | -1.29565517 |
| H | 1.93229853  | -0.67319136 | 1.20368288  |
| H | 3.66698287  | -0.58532444 | 1.62725719  |
| H | 2.65069643  | 0.87867917  | 1.72569474  |
| H | 3.65771340  | -0.72185359 | -2.00343655 |
| H | 4.22787379  | -1.51113607 | -0.50613485 |
| H | 2.49717004  | -1.58019478 | -0.94984610 |

M06-2X Energy = -675.937240751  
 NIMAG = 1  
 M06-2X H = -675.595974350  
 M06-2X G (HO) = -675.659362448  
 M06-2X G (GR) = -675.656106887

First Order Saddle Point for  
Disrotatory Ring Closure of  
(1E,2E)-1-((Z)-6-Ethylidene-  
cyclohexa-2,4-dien-1-ylidene)  
but-2-en-1-ol Anion with a  
Tetramethylammonium Counterion

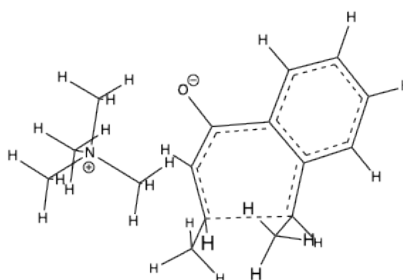

M06-2X Optimized Geometry

|   |             |             |             |
|---|-------------|-------------|-------------|
| C | 0.71885993  | 3.10347251  | -1.87723933 |
| C | 0.47793804  | 2.01141577  | -0.86749360 |
| C | 0.10616695  | 0.75164040  | -1.28509524 |
| C | 0.18829900  | -0.51196779 | -0.58873710 |
| C | 1.49115952  | -0.81196753 | 0.01585318  |
| C | 2.46845192  | 0.18198192  | 0.34546781  |
| C | 3.83866813  | -0.19590808 | 0.22565339  |
| C | 4.21446496  | -1.50263969 | 0.06851841  |
| C | 3.23194118  | -2.51688810 | -0.02016338 |
| C | 1.90771699  | -2.16599411 | -0.06134363 |
| C | 2.11352450  | 1.47528231  | 0.76266455  |
| C | 1.12491486  | 1.67079634  | 1.88647608  |
| O | -0.65913096 | -1.42346182 | -0.78598443 |
| H | 1.14498639  | -2.91510906 | -0.22852155 |
| H | 3.52863775  | -3.55479951 | -0.10054644 |
| H | 5.26514778  | -1.76461980 | 0.04406195  |
| H | 4.59297338  | 0.57395135  | 0.35098066  |
| H | 0.29012396  | 0.97175718  | 1.82054714  |
| H | 0.70825859  | 2.68082744  | 1.90606827  |
| H | 1.61162498  | 1.51869152  | 2.85670794  |
| H | 2.94037357  | 2.18350981  | 0.79216336  |

|   |             |             |             |
|---|-------------|-------------|-------------|
| H | -0.15377692 | 0.62041363  | -2.33531141 |
| H | 0.15083600  | 2.38170522  | 0.08758955  |
| H | -0.19352327 | 3.68028597  | -2.05551843 |
| H | 1.06040130  | 2.70228922  | -2.83164042 |
| H | 1.46927755  | 3.80936399  | -1.51804437 |
| N | -3.71176405 | -0.10655494 | 0.41413876  |
| C | -2.63271885 | 0.44695296  | 1.27953824  |
| C | -3.42880088 | 0.24024224  | -1.00828632 |
| C | -3.73588214 | -1.58958490 | 0.55484812  |
| C | -5.02340111 | 0.46350202  | 0.82054766  |
| H | -2.47527457 | -0.21394171 | -1.27430014 |
| H | -4.23565552 | -0.15624461 | -1.61991838 |
| H | -3.38741127 | 1.32343185  | -1.09282086 |
| H | -3.92566376 | -1.83272197 | 1.59727142  |
| H | -4.53153065 | -1.97869449 | -0.07543631 |
| H | -2.76779516 | -1.96793287 | 0.23403733  |
| H | -4.97415426 | 1.54425066  | 0.71609716  |
| H | -5.79109111 | 0.05332559  | 0.16980189  |
| H | -5.21376520 | 0.19003914  | 1.85508945  |
| H | -2.58954020 | 1.52336039  | 1.13223589  |
| H | -2.86971579 | 0.21297360  | 2.31441570  |
| H | -1.69803216 | -0.02040296 | 0.98384415  |

M06-2X Energy = -754.552066457  
NIMAG = 1  
M06-2X H = -754.150879050  
M06-2X G (HO) = -754.220028992  
M06-2X G (GR) = -754.216789291

First Order Saddle Point for  
Conrotatory Ring Closure of  
(1E,2E)-1-((Z)-6-Ethylidene-  
cyclohexa-2,4-dien-1-ylidene)  
but-2-en-1-ol Anion with a  
Tetramethylammonium Counterion

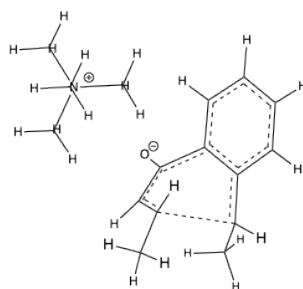

**M06-2X Optimized Geometry**

|   |             |             |             |
|---|-------------|-------------|-------------|
| C | 0.50350205  | 3.11353274  | -1.43011002 |
| C | 0.55897937  | 1.80747376  | -0.70143087 |
| C | 0.21803266  | 1.71958310  | 0.62825357  |
| C | 0.50374803  | 0.52260459  | 1.38225828  |
| C | 1.24198349  | -0.56624505 | 0.64039014  |
| C | 2.29799756  | -0.27322553 | -0.28209703 |
| C | 2.86222141  | 1.03338714  | -0.44623415 |
| C | 3.23699459  | 1.86948888  | 0.74456665  |
| C | 2.69585912  | -1.35738251 | -1.10323296 |
| C | 2.15911790  | -2.62734908 | -0.98050766 |
| C | 1.18806206  | -2.90614534 | -0.02028700 |
| C | 0.73520810  | -1.85258785 | 0.76757754  |
| O | 0.18849064  | 0.36776511  | 2.56207830  |
| H | 3.68664805  | 1.29017669  | 1.56391938  |
| H | 2.37961458  | 2.39034768  | 1.19617985  |
| H | 3.96557309  | 2.63287746  | 0.46404498  |
| H | 3.57434482  | 1.08676955  | -1.26748088 |
| H | -0.05977451 | -2.01386839 | 1.48841841  |
| H | 0.78656694  | -3.90337864 | 0.09805631  |

|   |             |             |             |
|---|-------------|-------------|-------------|
| H | 2.51714287  | -3.41677339 | -1.63124073 |
| H | 3.47284944  | -1.18222570 | -1.83962307 |
| H | 0.01247686  | 2.61676399  | 1.20230538  |
| H | 0.52169596  | 0.92098686  | -1.31865750 |
| H | 0.85960028  | 3.93000718  | -0.79959708 |
| H | -0.52929521 | 3.34592927  | -1.71257718 |
| H | 1.09345984  | 3.09136968  | -2.34516203 |
| N | -3.29329384 | -0.30439057 | -0.35649654 |
| C | -2.17267609 | -1.01318171 | -1.03532698 |
| C | -4.57765724 | -0.98642535 | -0.67392430 |
| C | -3.06639108 | -0.32300433 | 1.11588968  |
| C | -3.34787378 | 1.10525113  | -0.83373316 |
| H | -2.34888482 | -0.98375735 | -2.10755376 |
| H | -1.24600098 | -0.50187237 | -0.78379739 |
| H | -2.15141824 | -2.04024132 | -0.68022389 |
| H | -4.51891302 | -2.01115422 | -0.31711861 |
| H | -5.38253506 | -0.45483080 | -0.17344155 |
| H | -4.71879151 | -0.96558850 | -1.75126185 |
| H | -2.12513336 | 0.18084391  | 1.32583155  |
| H | -3.89151087 | 0.19539217  | 1.59712289  |
| H | -3.02754610 | -1.35915032 | 1.44178209  |
| H | -3.51788645 | 1.09611952  | -1.90711454 |
| H | -4.16404264 | 1.60972347  | -0.32364946 |
| H | -2.39752891 | 1.58043952  | -0.60011721 |

|               |                  |
|---------------|------------------|
| M06-2X Energy | = -754.554574277 |
| NIMAG         | = 1              |
| M06-2X H      | = -754.154411244 |
| M06-2X G (HO) | = -754.225817786 |
| M06-2X G (GR) | = -754.221700969 |

## References

- 1 Gaussian 09, Revision D.01, M. J. Frisch, G. W. Trucks, H. B. Schlegel, G. E. Scuseria, M. A. Robb, J. R. Cheeseman, G. Scalmani, V. Barone, B. Mennucci, G. A. Petersson, H. Nakatsuji, M. Caricato, X. Li, H. P. Hratchian, A. F. Izmaylov, J. Bloino, G. Zheng, J. L. Sonnenberg, M. Hada, M. Ehara, K. Toyota, R. Fukuda, J. Hasegawa, M. Ishida, T. Nakajima, Y. Honda, O. Kitao, H. Nakai, T. Vreven, J. A. Montgomery, Jr., J. E. Peralta, F. Ogliaro, M. Bearpark, J. J. Heyd, E. Brothers, K. N. Kudin, V. N. Staroverov, T. Keith, R. Kobayashi, J. Normand, K. Raghavachari, A. Rendell, J. C. Burant, S. S. Iyengar, J. Tomasi, M. Cossi, N. Rega, J. M. Millam, M. Klene, J. E. Knox, J. B. Cross, V. Bakken, C. Adamo, J. Jaramillo, R. Gomperts, R. E. Stratmann, O. Yazyev, A. J. Austin, R. Cammi, C. Pomelli, J. W. Ochterski, R. L. Martin, K. Morokuma, V. G. Zakrzewski, G. A. Voth, P. Salvador, J. J. Dannenberg, S. Dapprich, A. D. Daniels, O. Farkas, J. B. Foresman, J. V. Ortiz, J. Cioslowski, and D. J. Fox, Gaussian, Inc., Wallingford CT, 2013.
- 2 G. M. J. Barca, C. Bertoni, L. Carrington, D. Datta, N. De Silva, J. E. Deustua, D. G. Fedorov, J. R. Gour, A. O. Gunina, E. Guidez, T. Harville, S. Irle, J. Ivanic, K. Kowalski, S. S. Leang, H. Li, W. L., J. J. Lutz, I. Magoulas, J. Mato, V. Mironov, H. Nakata, B. Q. Pham, P. Piecuch, D. Poole, S. R. Pruitt, A. P. Rendell, L. B. Roskop, K. Ruedenberg, T. Sattasathuchana, M. W. Schmidt, J. Shen, L. Slipchenko, M. Sosonkina, V. Sundriyal, A. Tiwari, J. L. Galvez Vallejo, B. Westheimer, M. Wloch, P. Xu, F. Zahariev and M. S. Gordon. *J. Chem. Phys.* 2020, **152**, 154102.
- 3 F. Neese, *WIREs Comput. Molec. Sci.*, 2022, **12**, e1606.
- 4 I. Schapiro, K. Sivalingam and F. Neese, *J. Theo. Comp. Chem.*, 2013, **9**, 3567-3580.
- 5 C. Kollmar, K. Sivalingam and F. Neese, *J. Chem. Phys.*, 2021, **155**, 234104.
